# Supplementary material for: Effects of 5′,8′-Cyclo-2′-Deoxypurines on the Base Excision Repair of Clustered DNA Lesions in Nuclear Extracts of the XPC Cell Line
Source: MDPI journal article supplement (doi:10.3390/cells10113254), 2021-11-20
Supplement: s1 [file s1]

# Effects of 5',8'-cyclo-2'-deoxypurines on the Base Excision Repair of Clustered DNA Lesions in Nuclear Extracts of XPC Cell Line

## Supplementary Materials

| Page  | Item              | Title                                                                                                                                        |
|-------|-------------------|----------------------------------------------------------------------------------------------------------------------------------------------|
| 2     | <b>Figure S1</b>  | Verification of the ss-oligos labeling, hybridization, AP sites' formation (after UDG treatment) and SSBs' formation (after hAPE1 treatment) |
| 2     | <b>Table S1</b>   | The calculated vs. found masses of chosen substrate oligonucleotides                                                                         |
| 3-6   | <b>Figure S2</b>  | Results of mass spectrometry analysis of chosen substrate oligonucleotides containing cdA                                                    |
| 7-8   | <b>Figure S3</b>  | The autoradiograms presenting repair of ss-CDL and ds-CDL containing <b>ScdA</b> – XPC Nuclear Extract                                       |
| 9-10  | <b>Figure S4</b>  | The autoradiograms presenting repair of ss-CDL and ds-CDL containing <b>RcdA</b> – XPC Nuclear Extract                                       |
| 11-13 | <b>Figure S5</b>  | Graphical representation of repair assays' results for ScdA – XPC Nuclear Extract                                                            |
| 14    | <b>Table S2</b>   | Numerical data – Control 1 – XPC Nuclear Extract                                                                                             |
| 15-17 | <b>Table S3</b>   | Numerical data – ScdA – XPC Nuclear Extract                                                                                                  |
| 18-20 | <b>Figure S6</b>  | Graphical representation of repair assays' results for RcdA – XPC Nuclear Extract                                                            |
| 21-23 | <b>Table S4</b>   | Numerical data – RcdA – XPC Nuclear Extract                                                                                                  |
| 24-27 | <b>Figure S7</b>  | AP site rejoining [%] of ScdA vs. RcdA – comparison of individual strands – XPC Nuclear Extract                                              |
| 28-29 | <b>Figure S8</b>  | The autoradiograms presenting repair of ss-CDL and ds-CDL containing <b>ScdA</b> – BJ Nuclear Extract                                        |
| 30-31 | <b>Figure S9</b>  | The autoradiograms presenting repair of ss-CDL and ds-CDL containing <b>RcdA</b> – BJ Nuclear Extract                                        |
| 32-34 | <b>Figure S10</b> | Graphical representation of repair assays' results for ScdA – BJ Nuclear Extract                                                             |
| 35    | <b>Table S5</b>   | Numerical data – Control 1 – BJ Nuclear Extract                                                                                              |
| 36-38 | <b>Table S6</b>   | Numerical data – ScdA – BJ Nuclear Extract                                                                                                   |
| 39-41 | <b>Figure S11</b> | Graphical representation of repair assays' results for RcdA – BJ Nuclear Extract                                                             |
| 42-44 | <b>Table S7</b>   | Numerical data – RcdA – BJ Nuclear Extract                                                                                                   |
| 45-48 | <b>Figure S12</b> | AP site rejoining [%] of ScdA vs. RcdA – comparison of individual strands – BJ Nuclear Extract                                               |
| 49-52 | <b>Figure S13</b> | AP site rejoining [%] of BJ vs. XPC – comparison of individual strands – ScdA Nuclear Extract                                                |
| 53-56 | <b>Figure S14</b> | AP site rejoining [%] of BJ vs. XPC – comparison of individual strands – RcdA Nuclear Extract                                                |

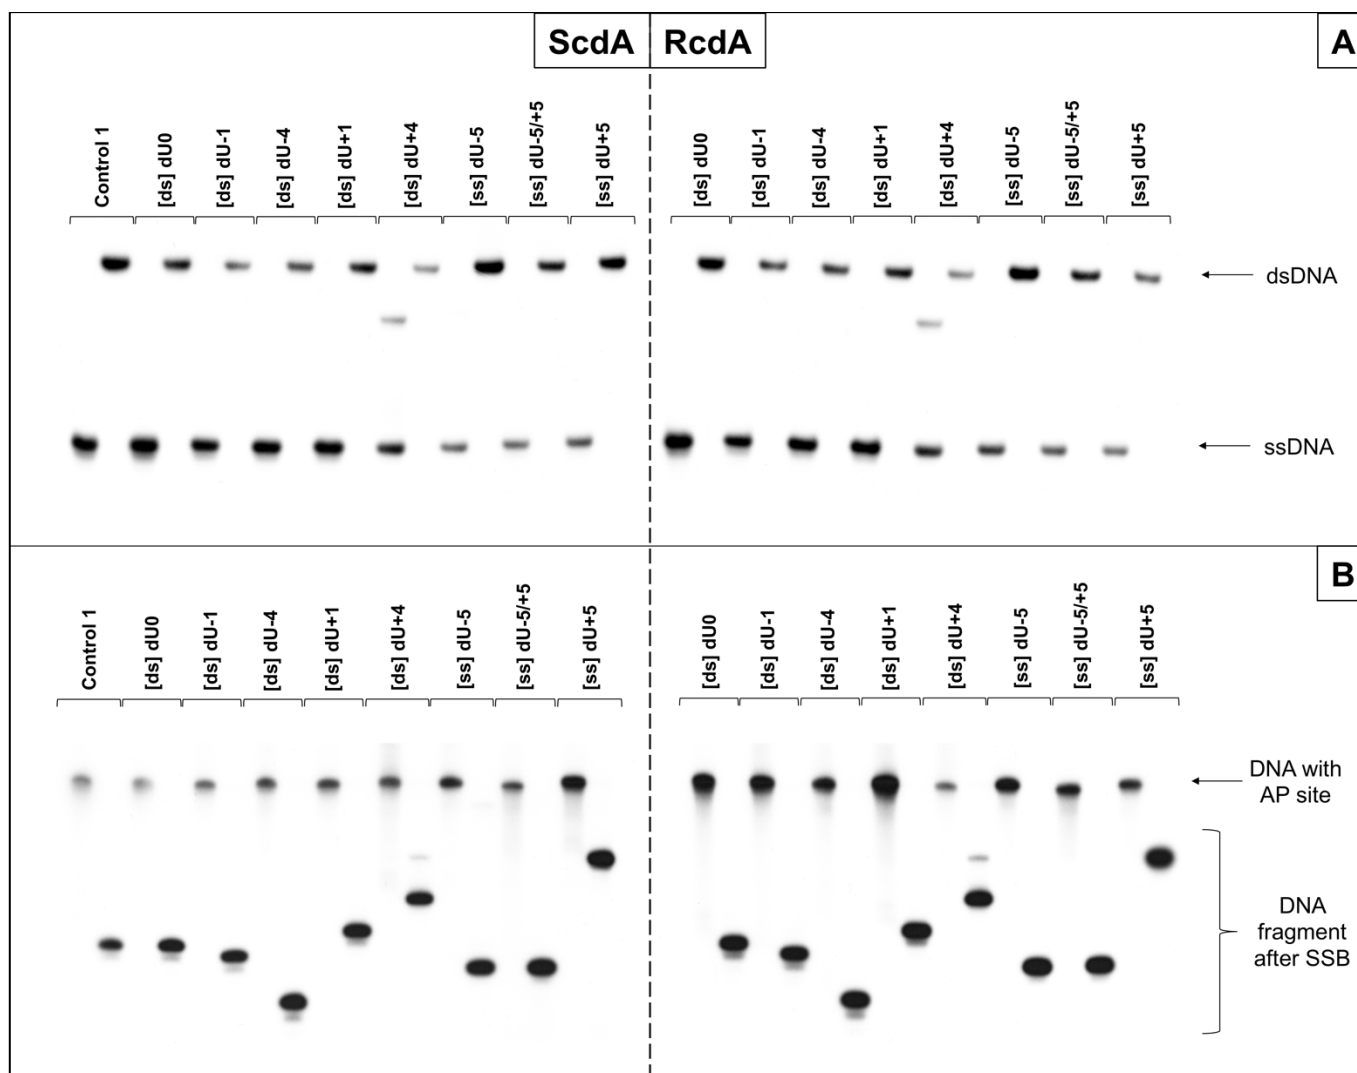

**Figure S1. (A)** Verification of efficient annealing of single-stranded (ssDNA) and double-stranded (dsDNA) oligonucleotides on the 15% native polyacrylamide gel. **(B)** Verification of AP sites' stability/purity and SSBs formation (after APE1 treatment) on the 15% denaturing polyacrylamide gel. [ds] – double-stranded lesions (located on the opposite DNA strands); [ss] – single-stranded lesions (located on the same DNA strand); SSB – single stranded break.

**Table S1.** The calculated vs. found masses of chosen substrate oligonucleotide strands used in the study.

| Oligonucleotide            | Calculated Mass | Found Mass  |
|----------------------------|-----------------|-------------|
| Control 1 – strand with dU | 12,167.90       | 12,168.25   |
| Control 1 – native strand  | 12,181.98       | 12,182.42   |
| Mtx-ScdA                   | 12,407.00       | 12,408.30   |
| Mtx-RcdA                   | 12,407.00       | 12,407.30   |
| ScdA(-5)                   | 12,165.90       | 12,166.501  |
| ScdA(-5/+5)                | 12,166.89       | 12,167.2002 |
| ScdA(+5)                   | 12,180.90       | 12,181.541  |

A.

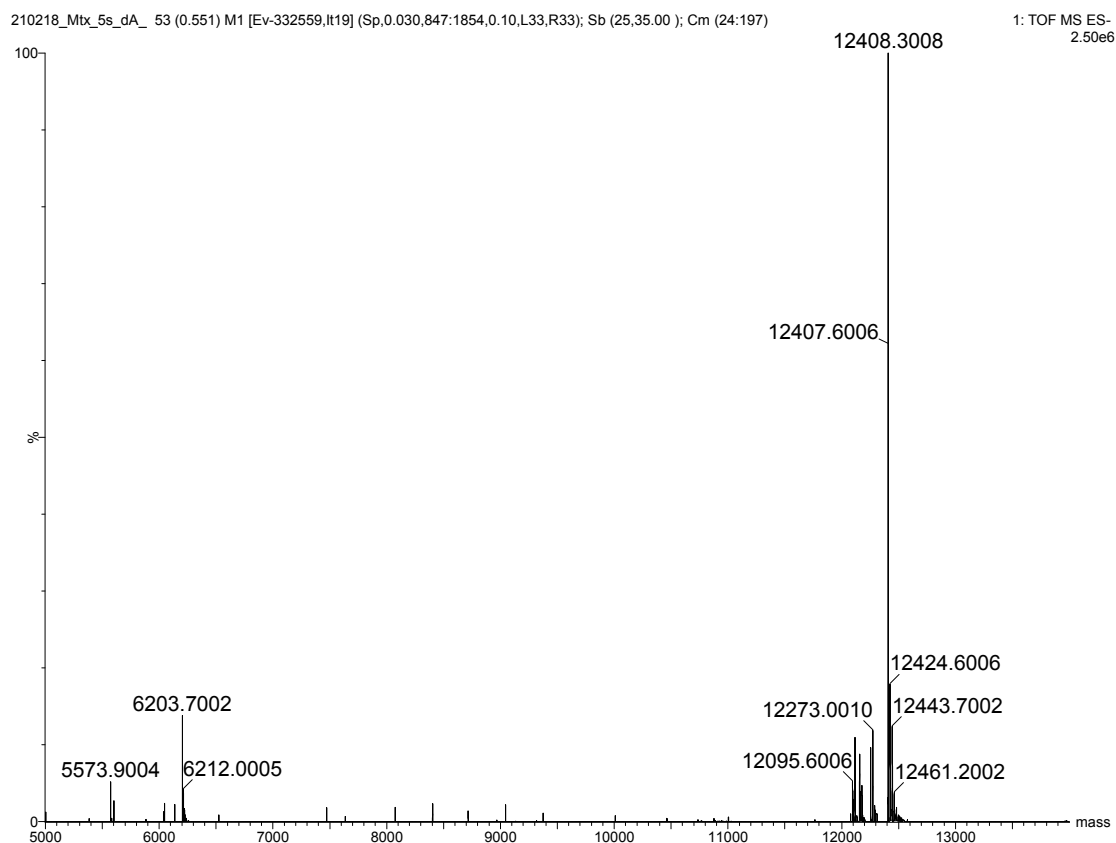

B.

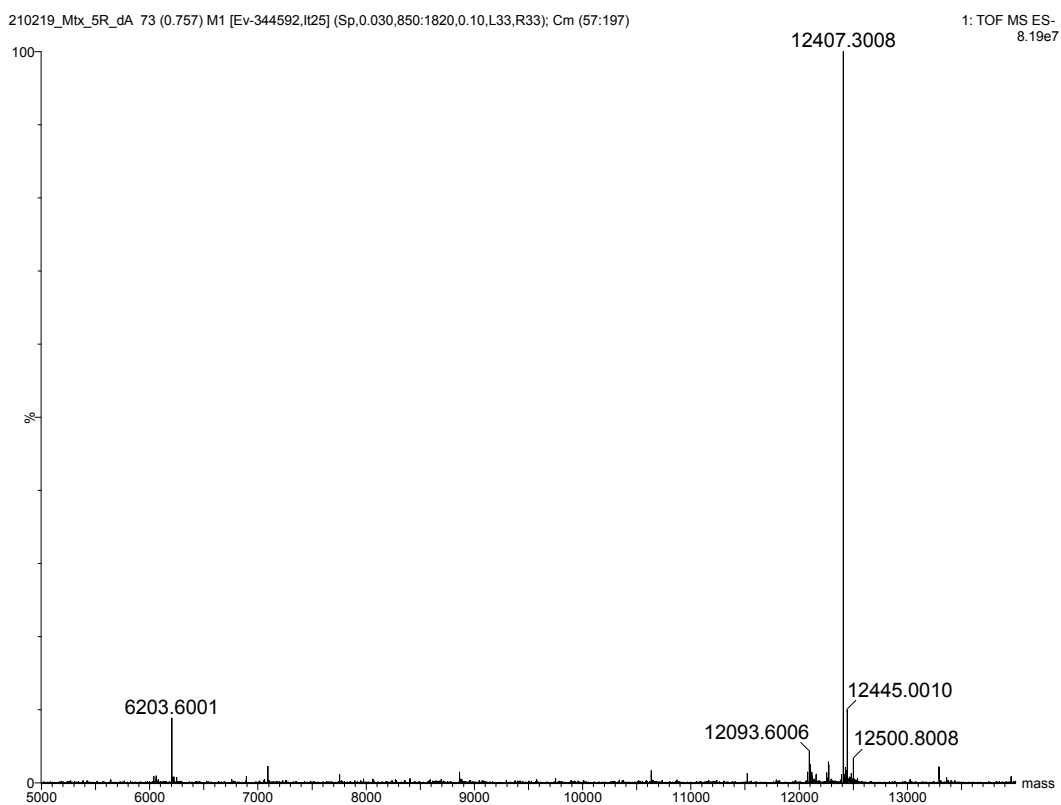

C.

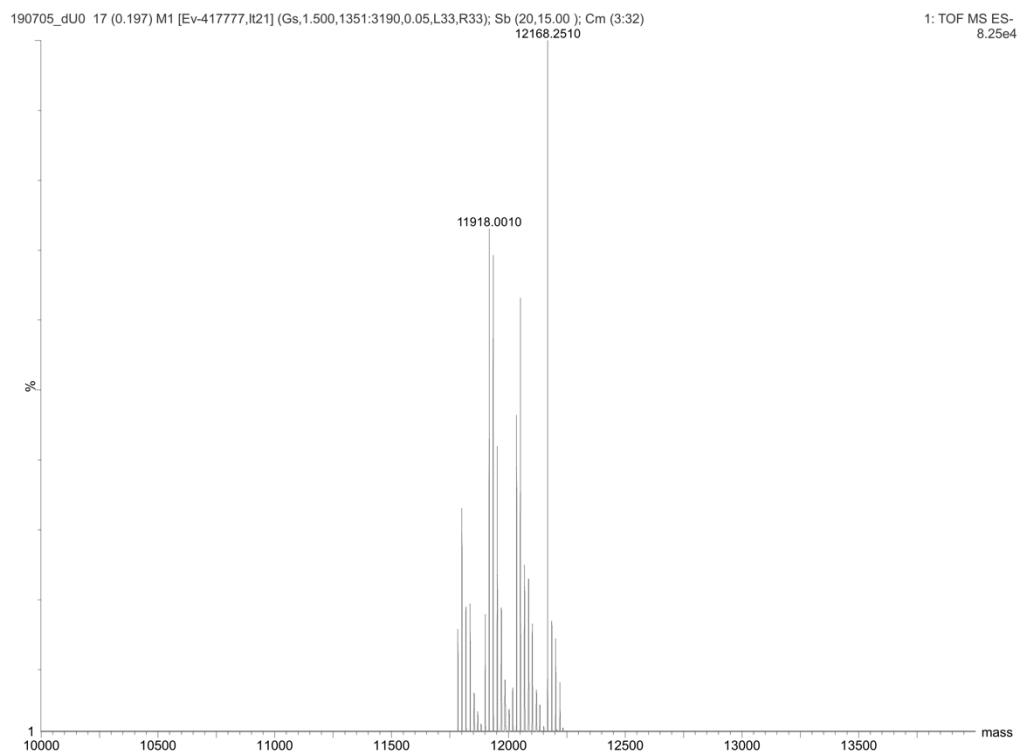

D.

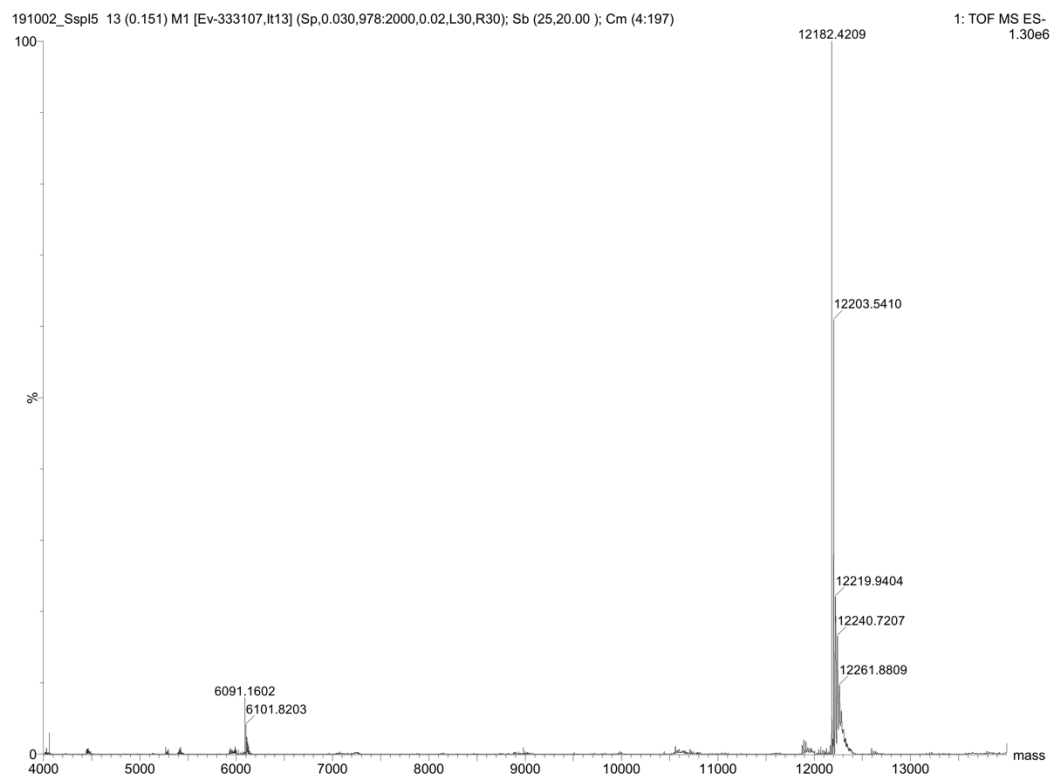



E.

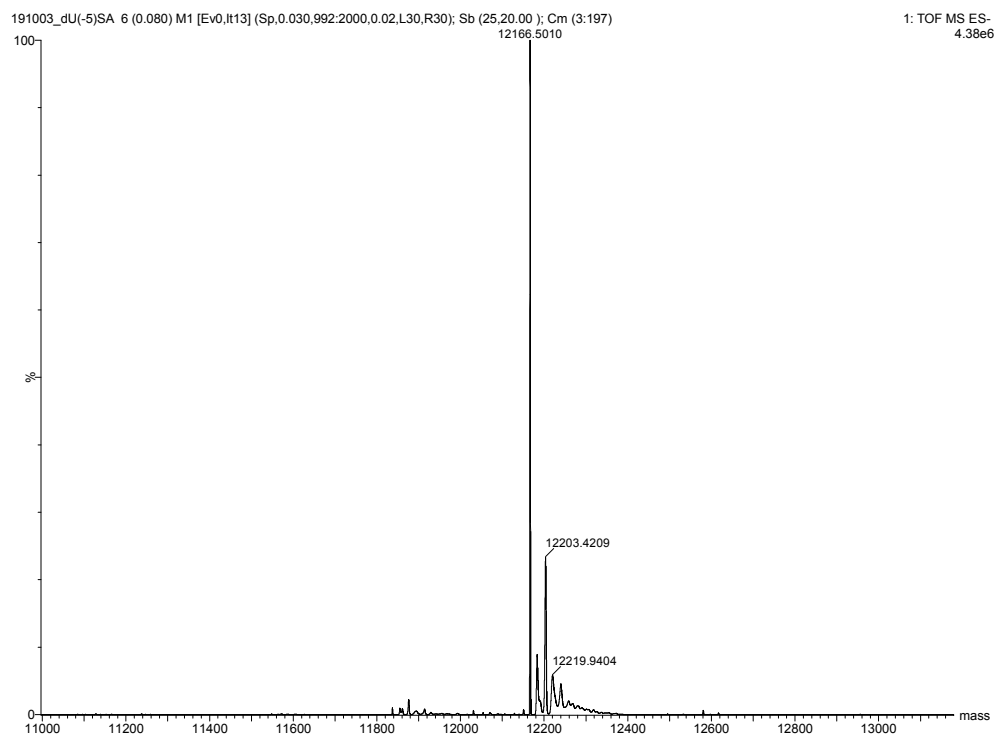

F.

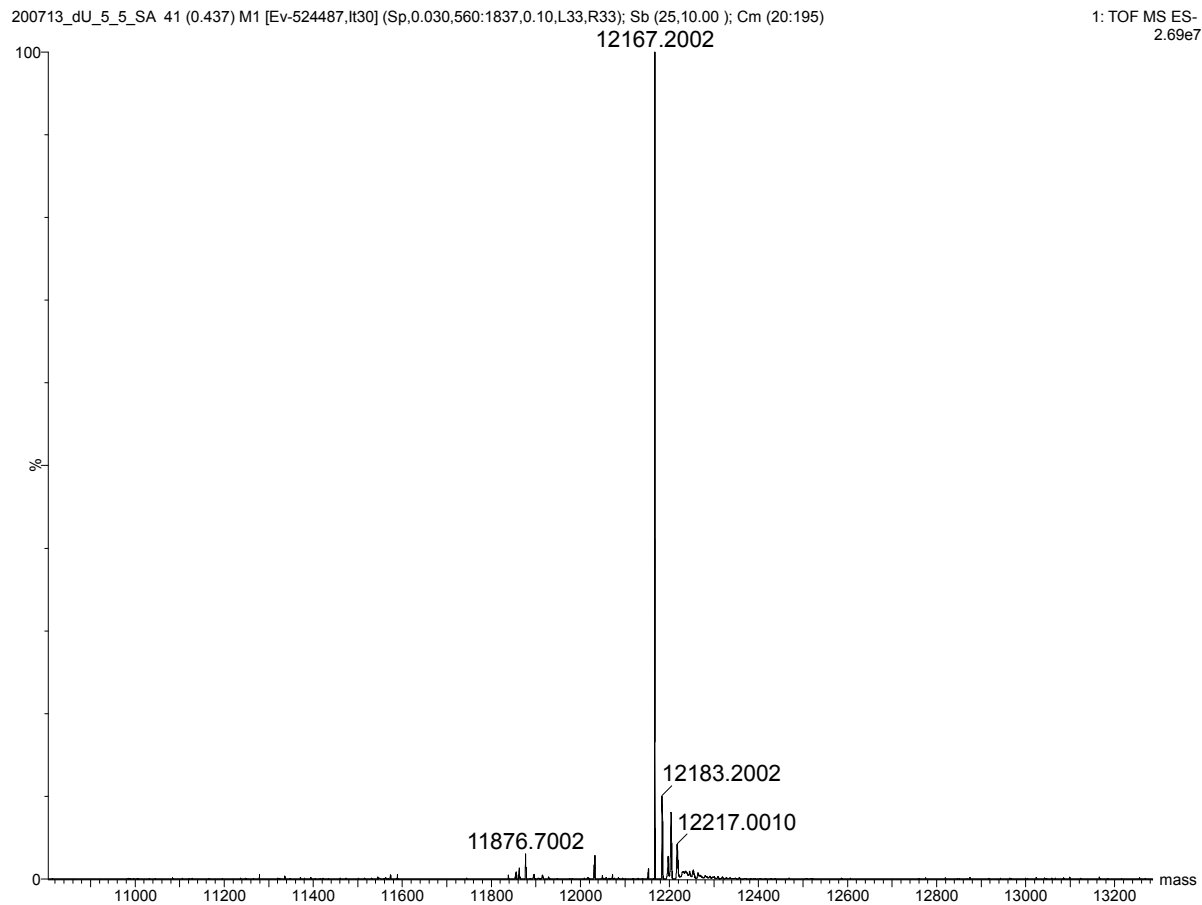

G.

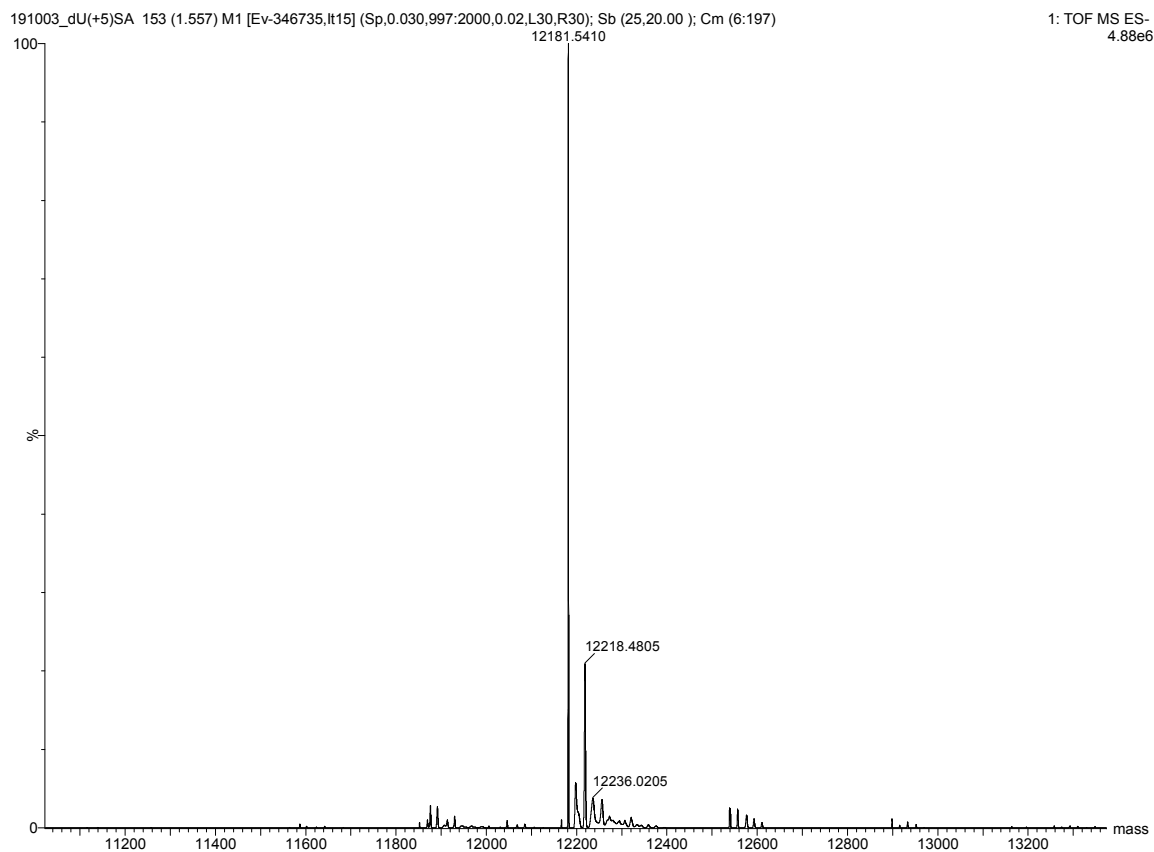

**Figure S2.** Results of mass spectrometry analysis of chosen substrate oligonucleotides containing cdA. **(A)** ssDNA with (5'S)-5',8-cyclo-2'-deoxyadenosine (Mtx-ScdA); **(B)** ssDNA with (5'R)-5',8-cyclo-2'-deoxyadenosine (Mtx-RcdA); **(C)** ssDNA with 2'-deoxyuridine (Control 1 – strand with dU); **(D)** native ssDNA (Control 1 – native strand); **(E)** ssDNA with (5'S)-5',8-cyclo-2'-deoxyadenosine and 2'-deoxyuridine in the -5 position (ScdA(-5)); **(F)** ssDNA with (5'S)-5',8-cyclo-2'-deoxyadenosine and two 2'-deoxyuridines in the -5 and +5 position (ScdA(-5/+5)); **(G)** ssDNA with (5'S)-5',8-cyclo-2'-deoxyadenosine and 2'-deoxyuridine in the +5 position (ScdA(+5)).

A.

1

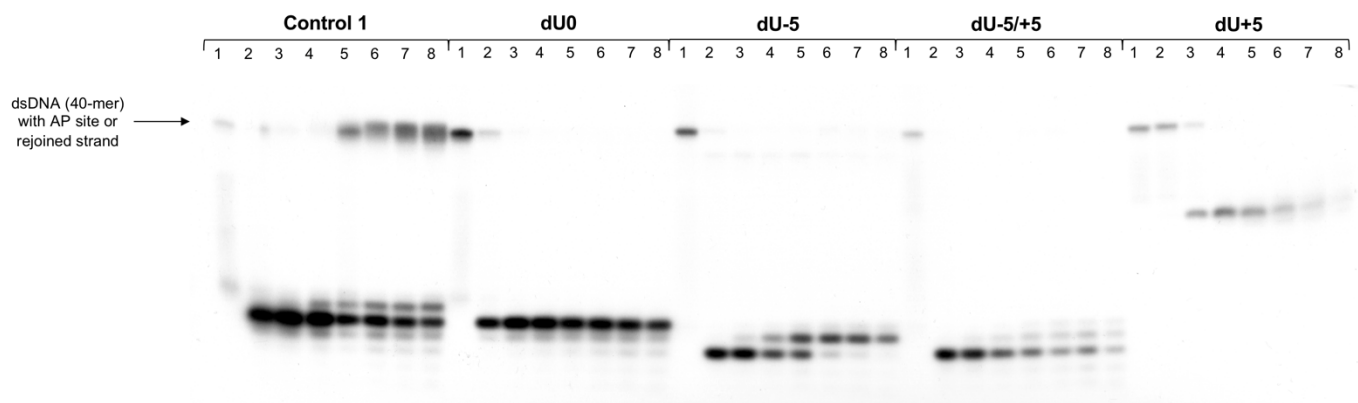

2

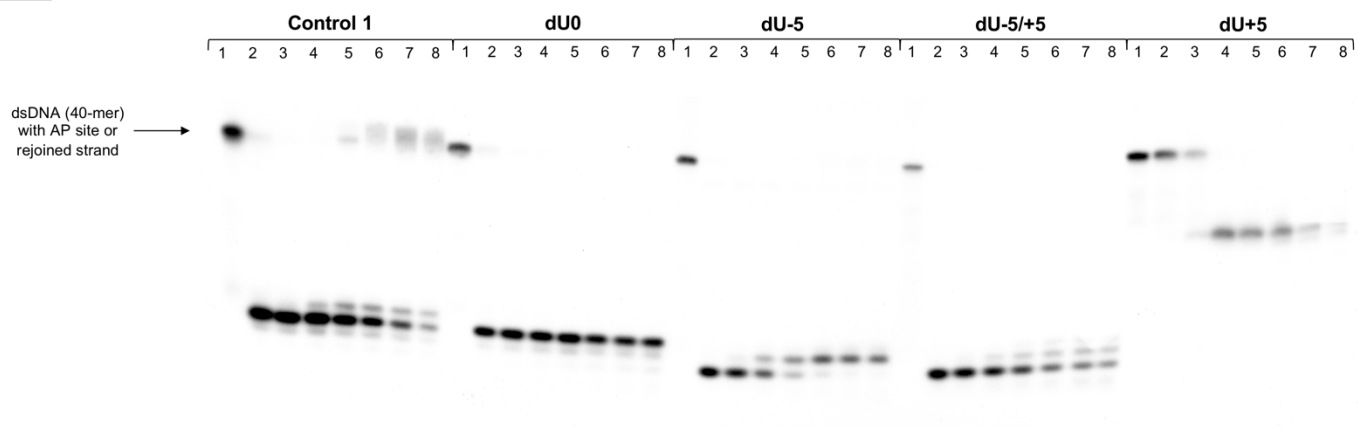

3

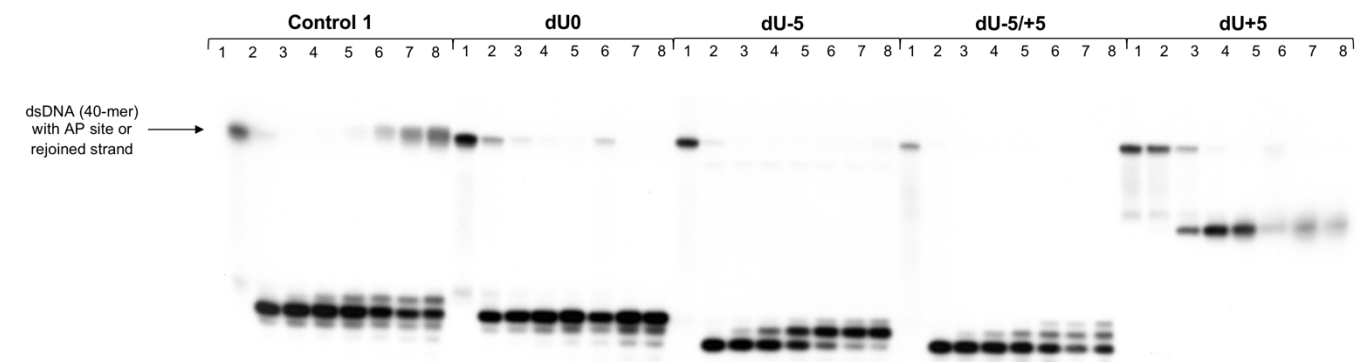

B.

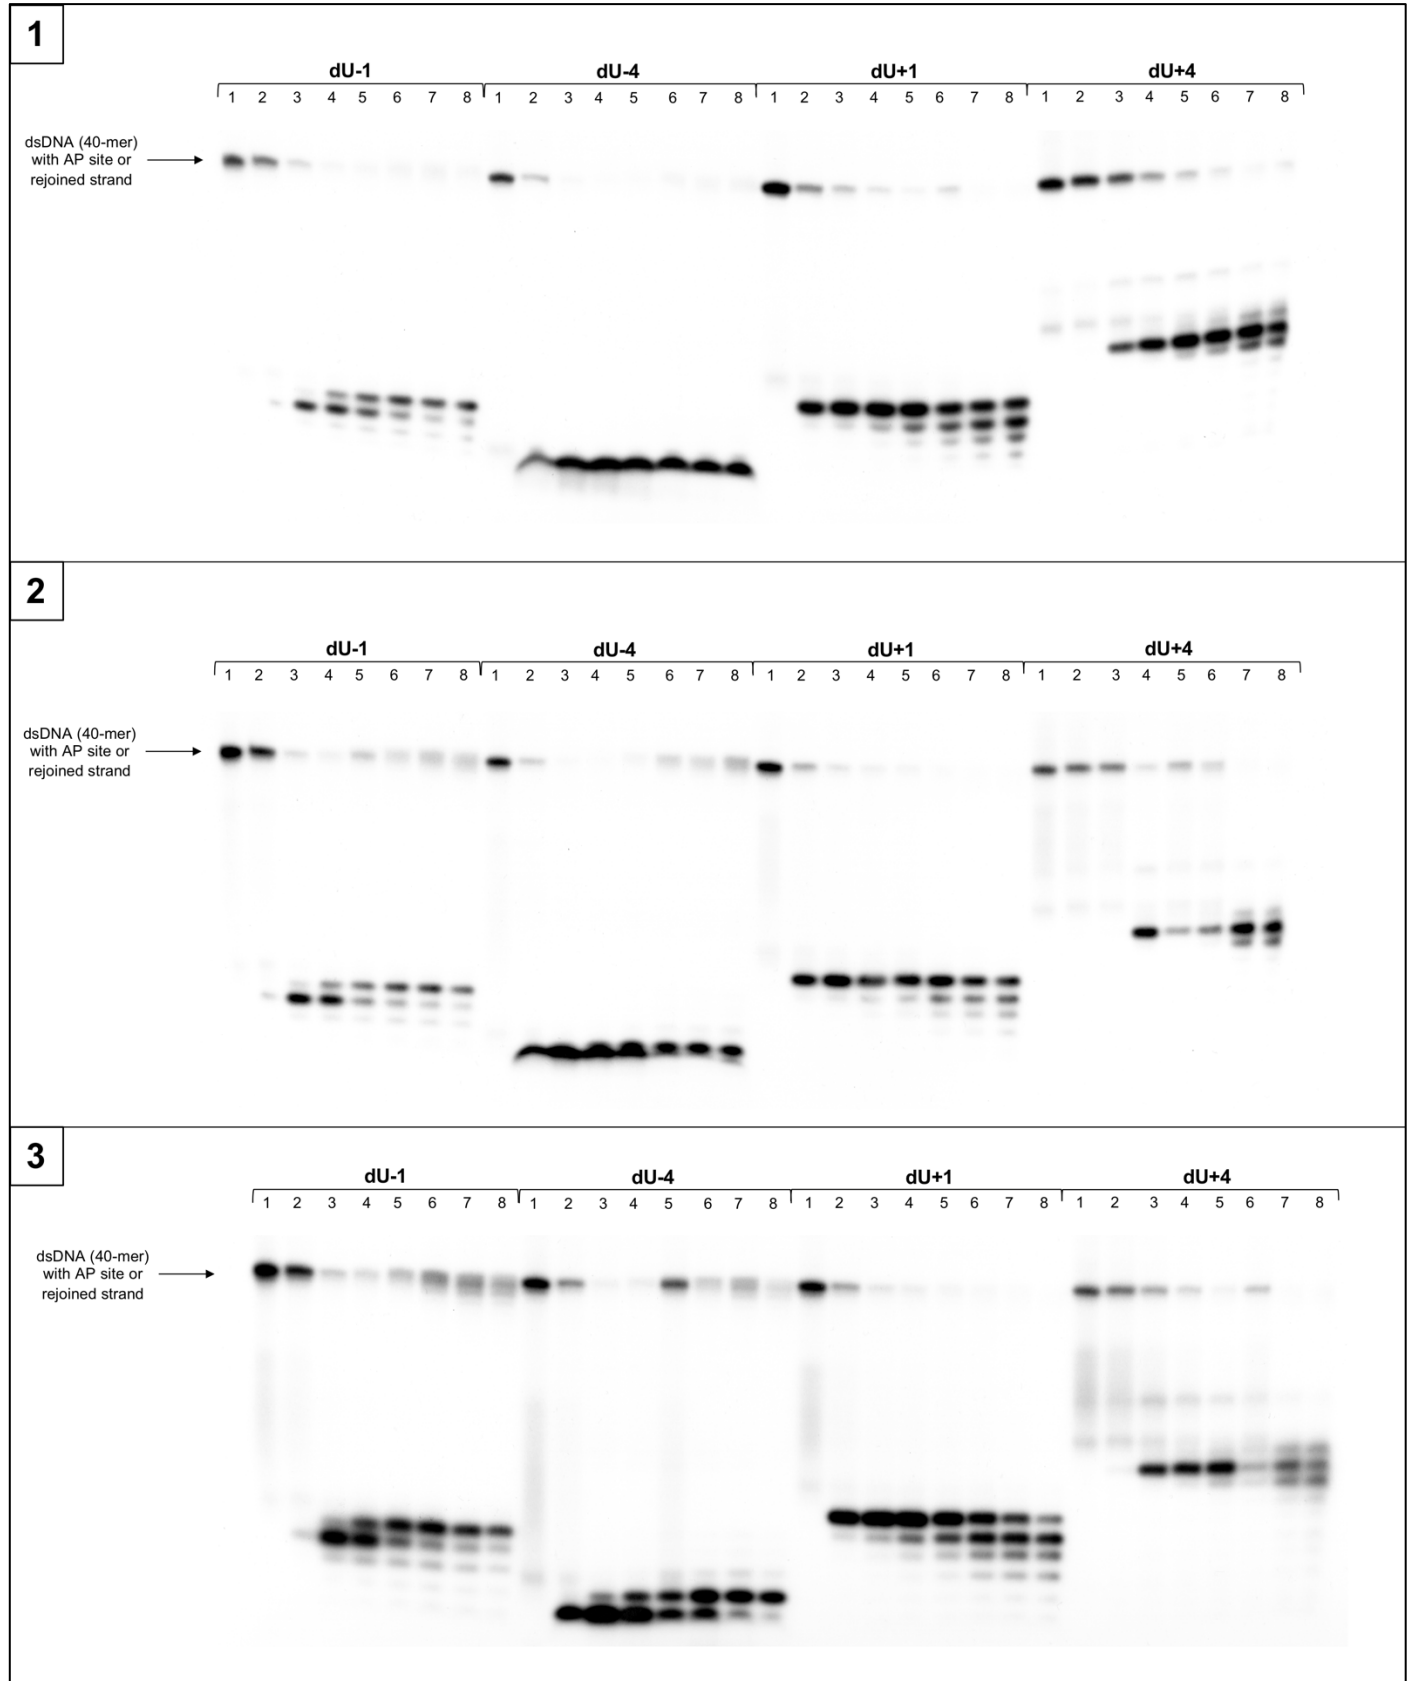

**Figure S3.** The autoradiograms presenting repair of (A) ss-CDL and (B) ds-CDL containing **ScdA** – XPC Nuclear Extract. Lanes correspond with different assay time: lane 1 - 0 min; lane 2 - 1 min; lane 3 – 5 min; lane 4 – 15 min; lane 5 – 30 min; lane 6 – 60 min; lane 7 – 90 min; lane 8 – 120 min. Three replications of the experiment are shown.

A.

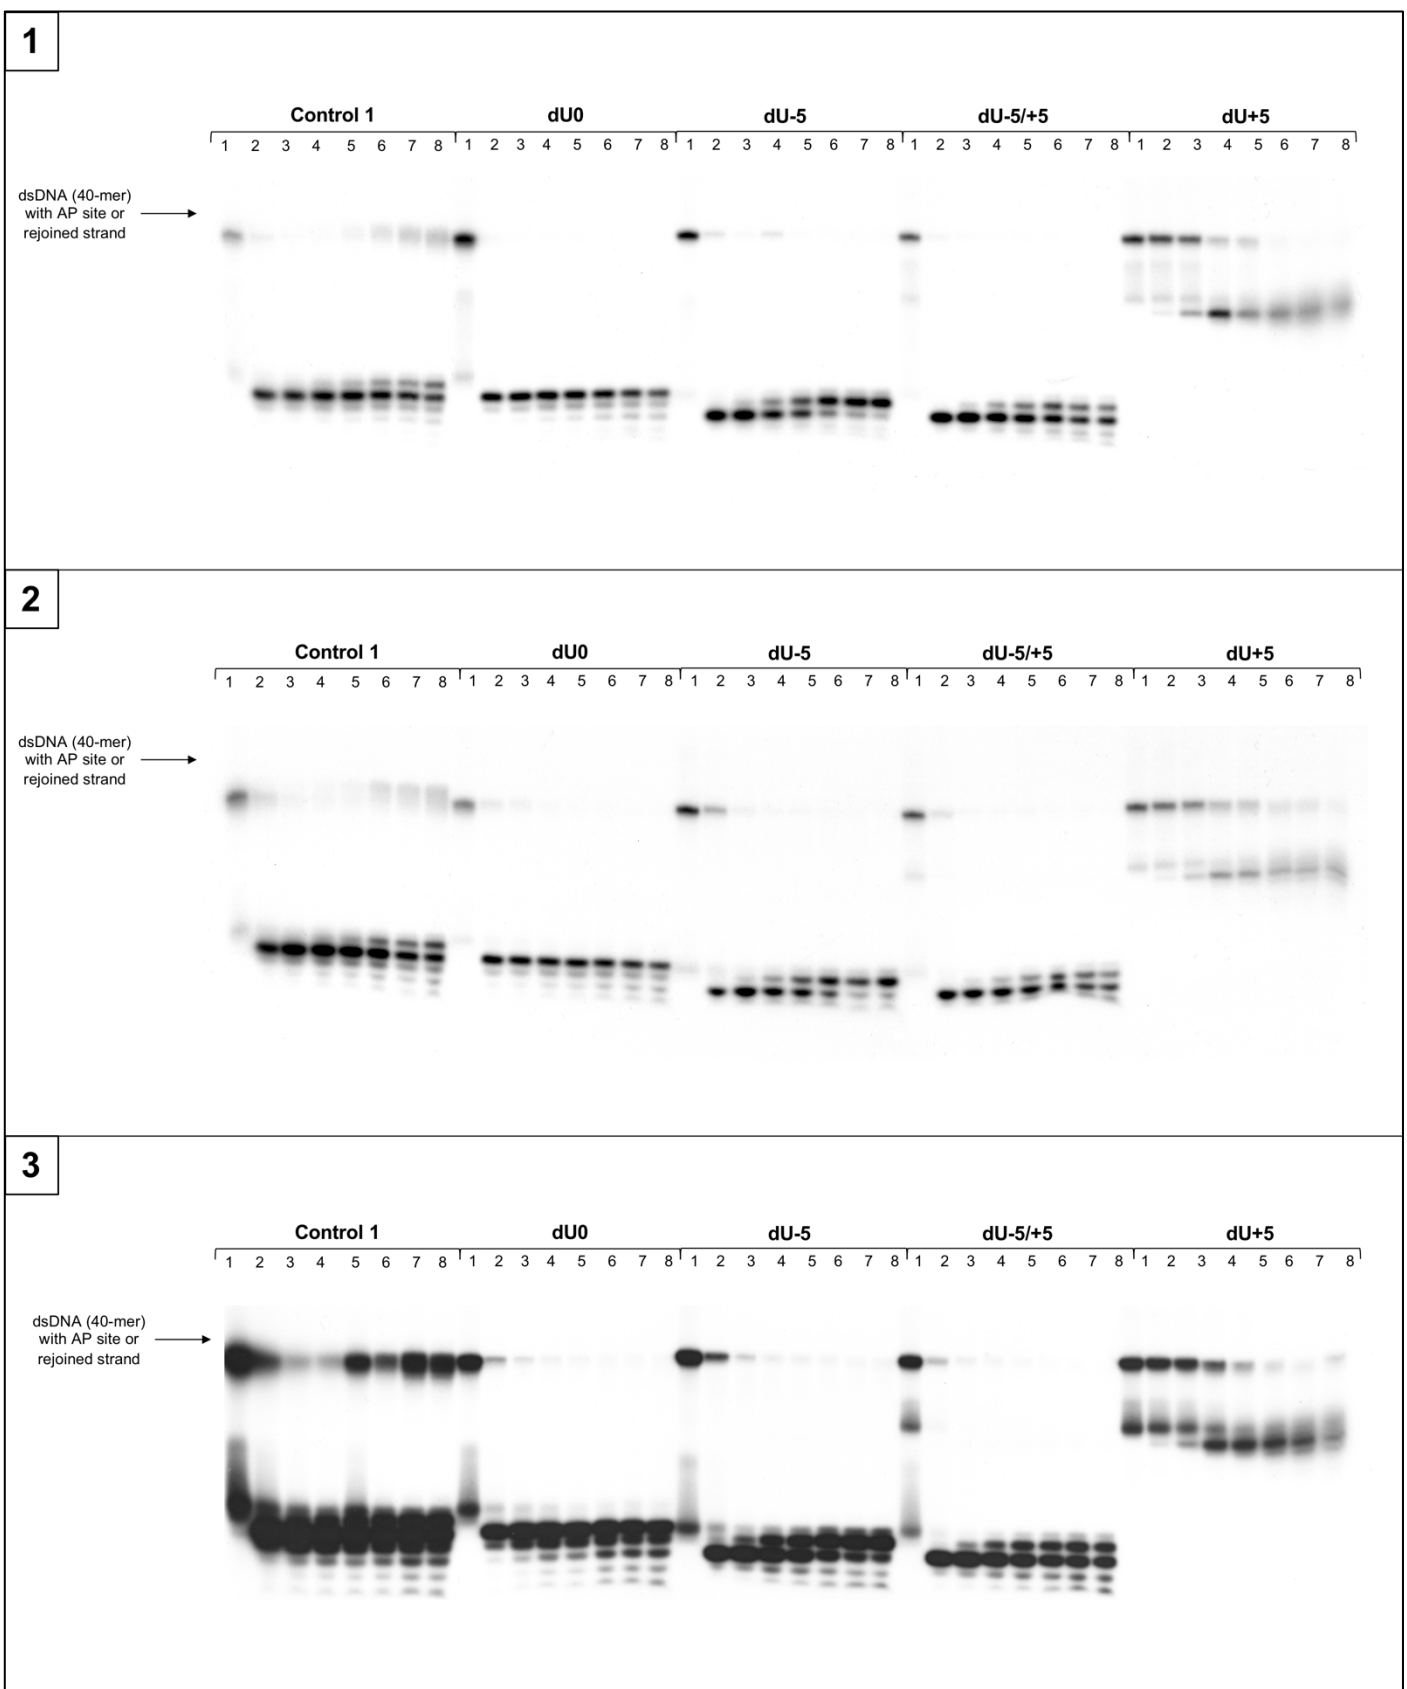

B.

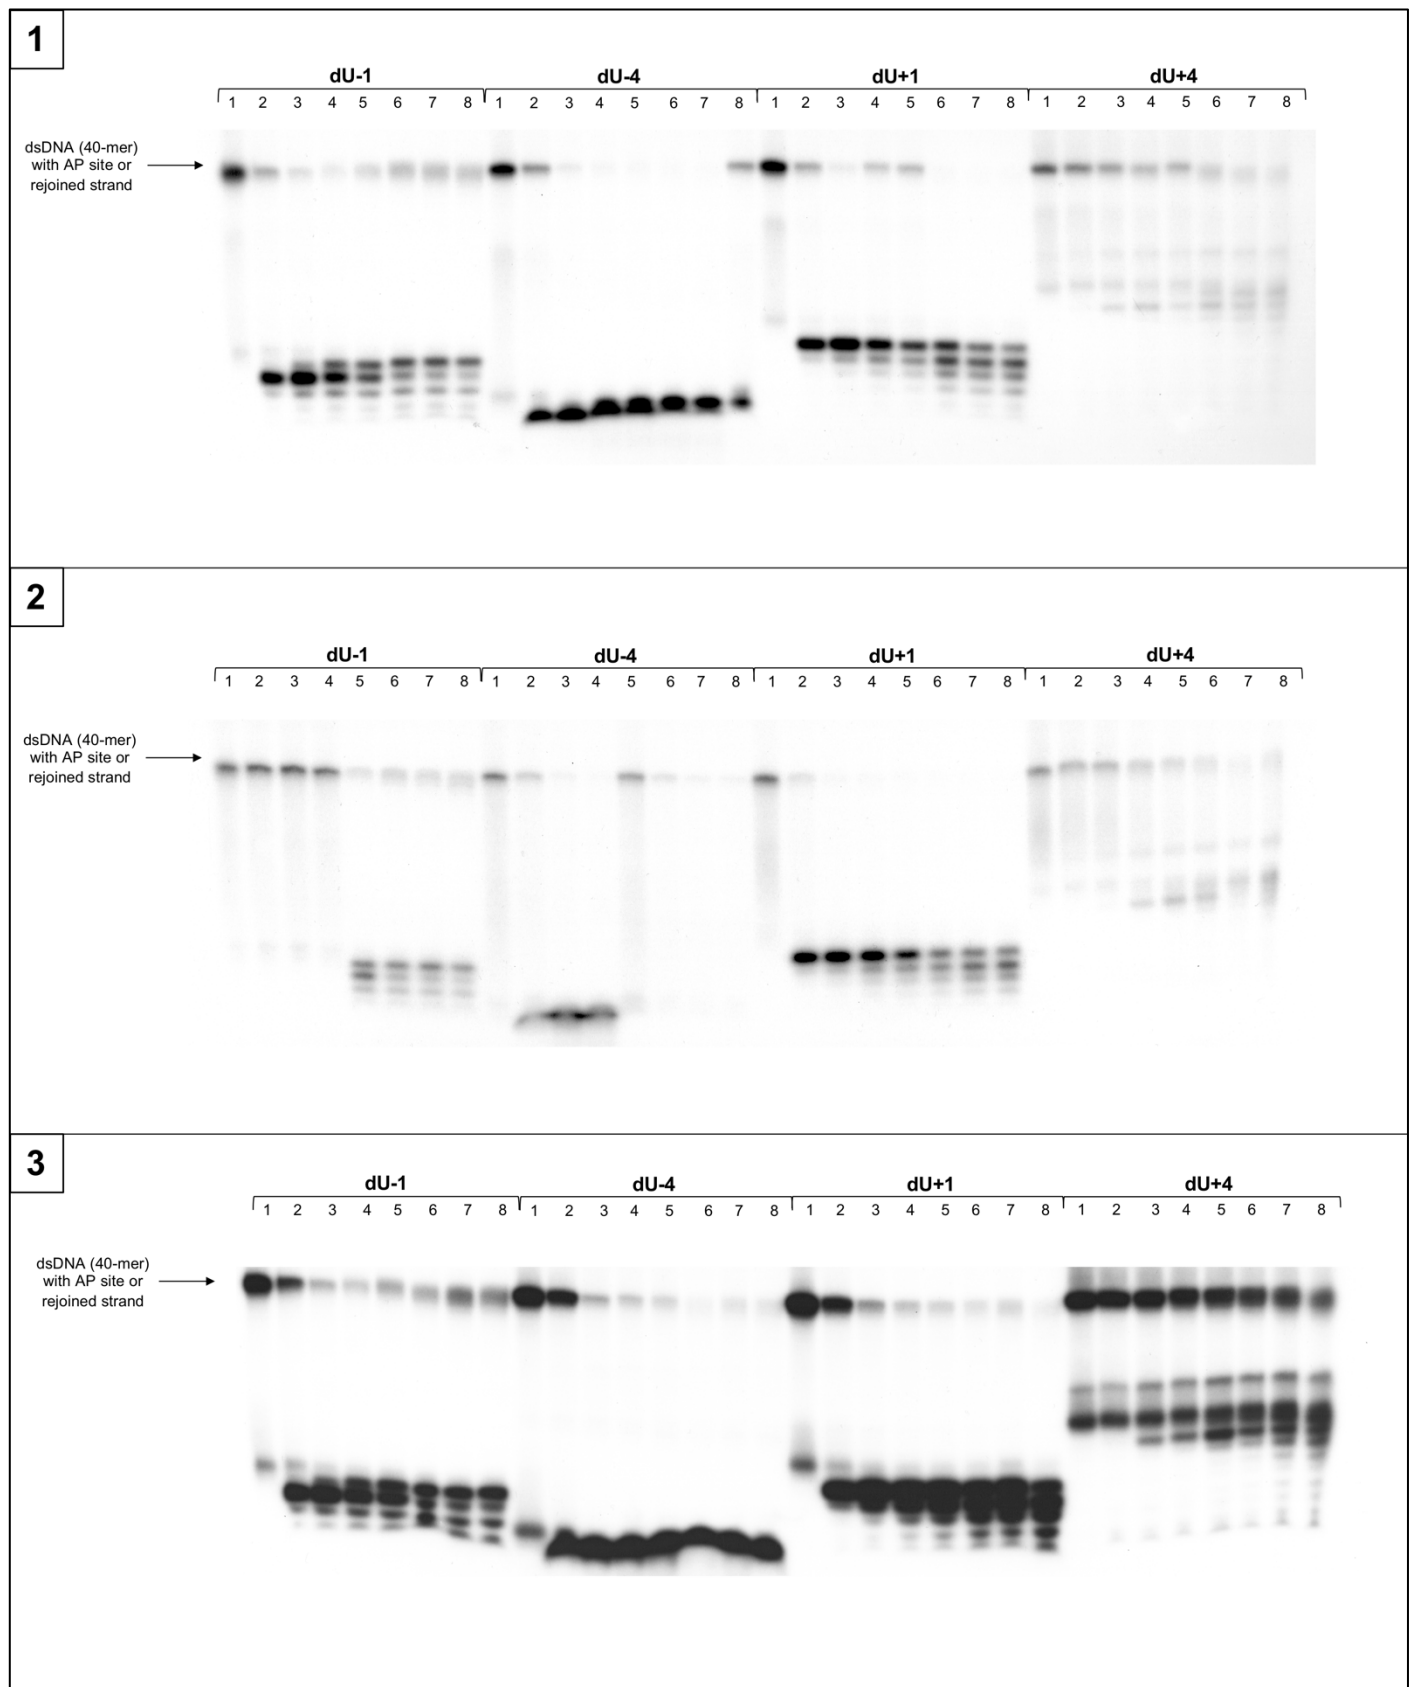

**Figure S4.** The autoradiograms presenting repair of (A) ss-CDL and (B) ds-CDL containing **RcdA** – XPC Nuclear Extract. Lanes correspond with different assay time: lane 1 - 0 min; lane 2 - 1 min; lane 3 - 5 min; lane 4 - 15 min; lane 5 - 30 min; lane 6 - 60 min; lane 7 - 90 min; lane 8 - 120 min. Three replications of the experiment are shown.

A.

- Control 1
- dU-5
- dU-5/+5
- dU+5
- dU0

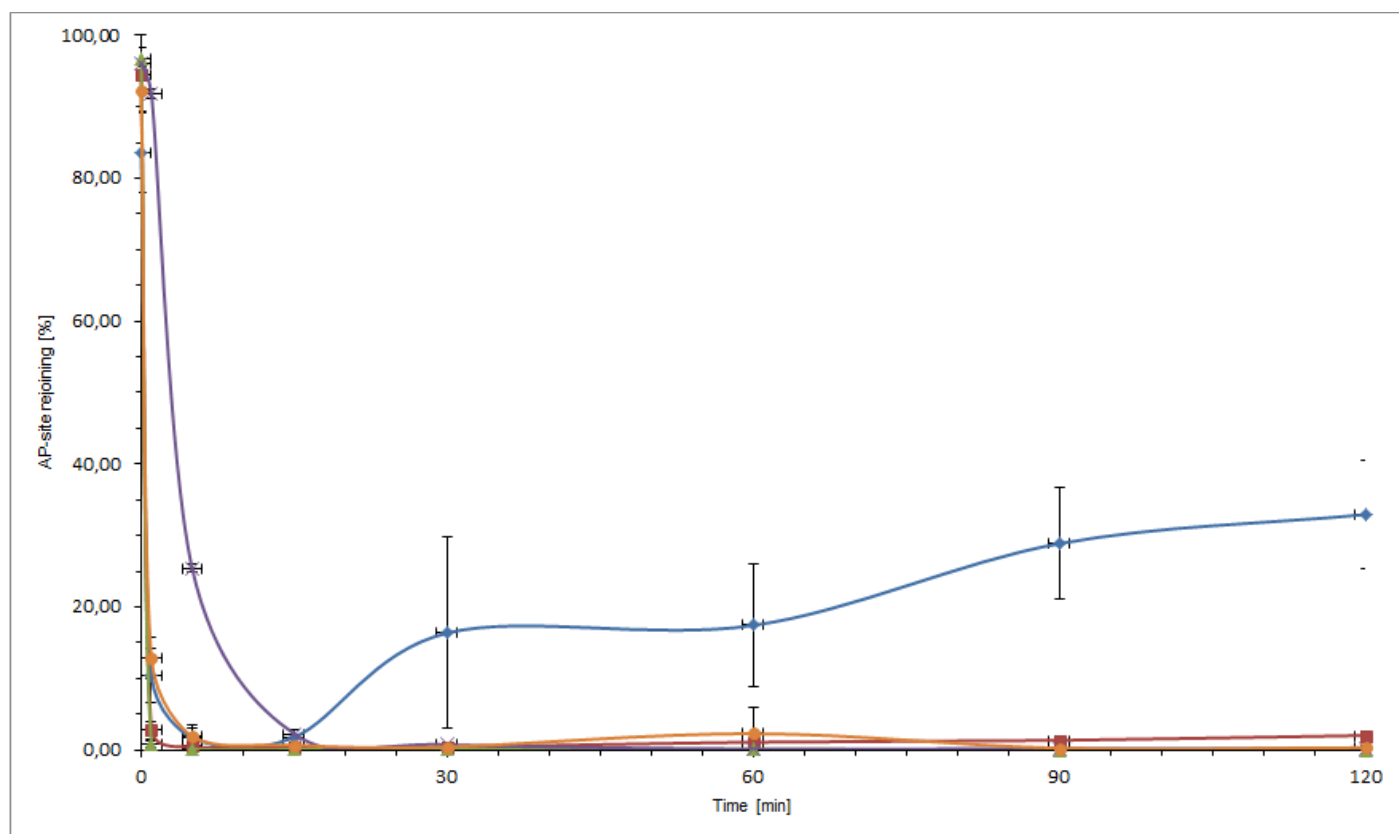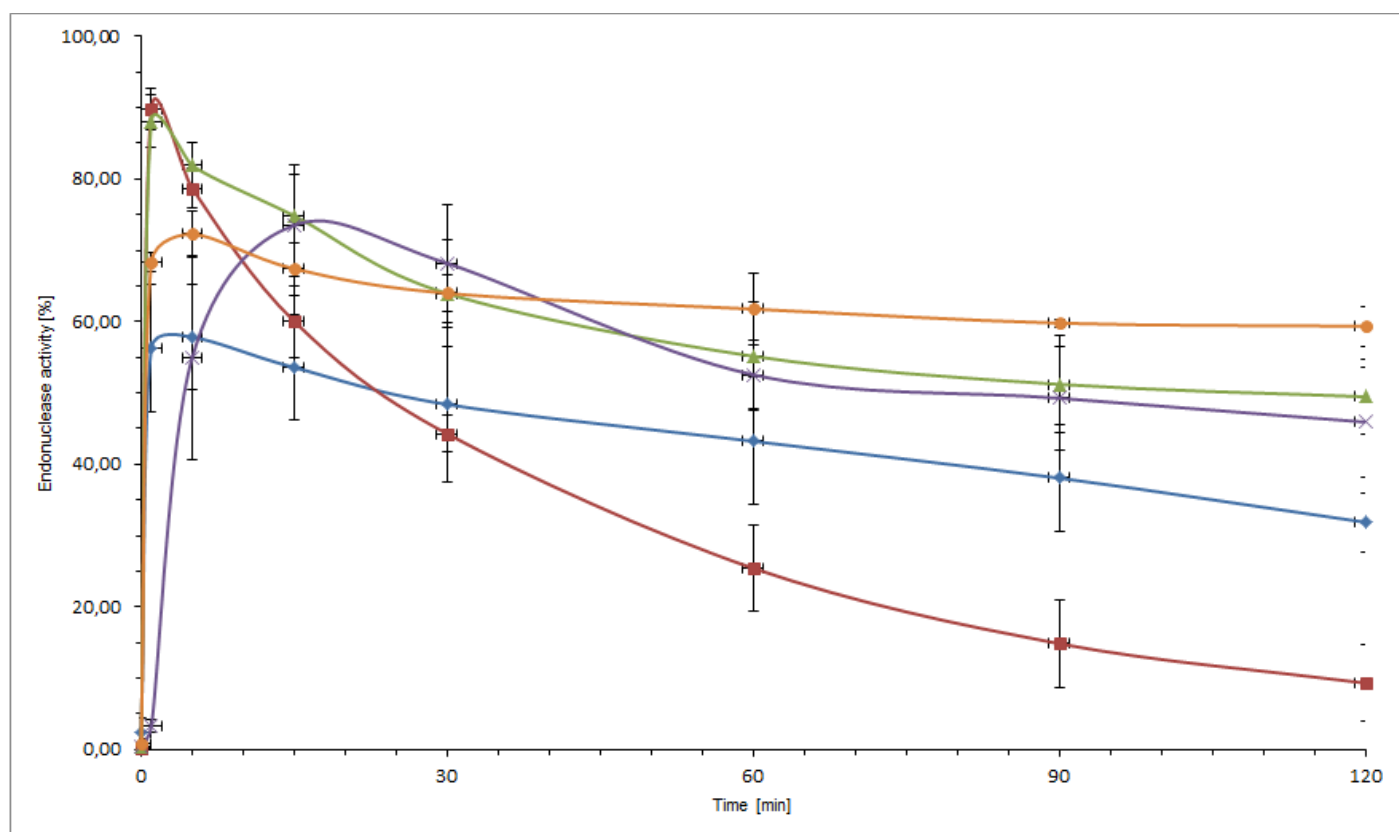

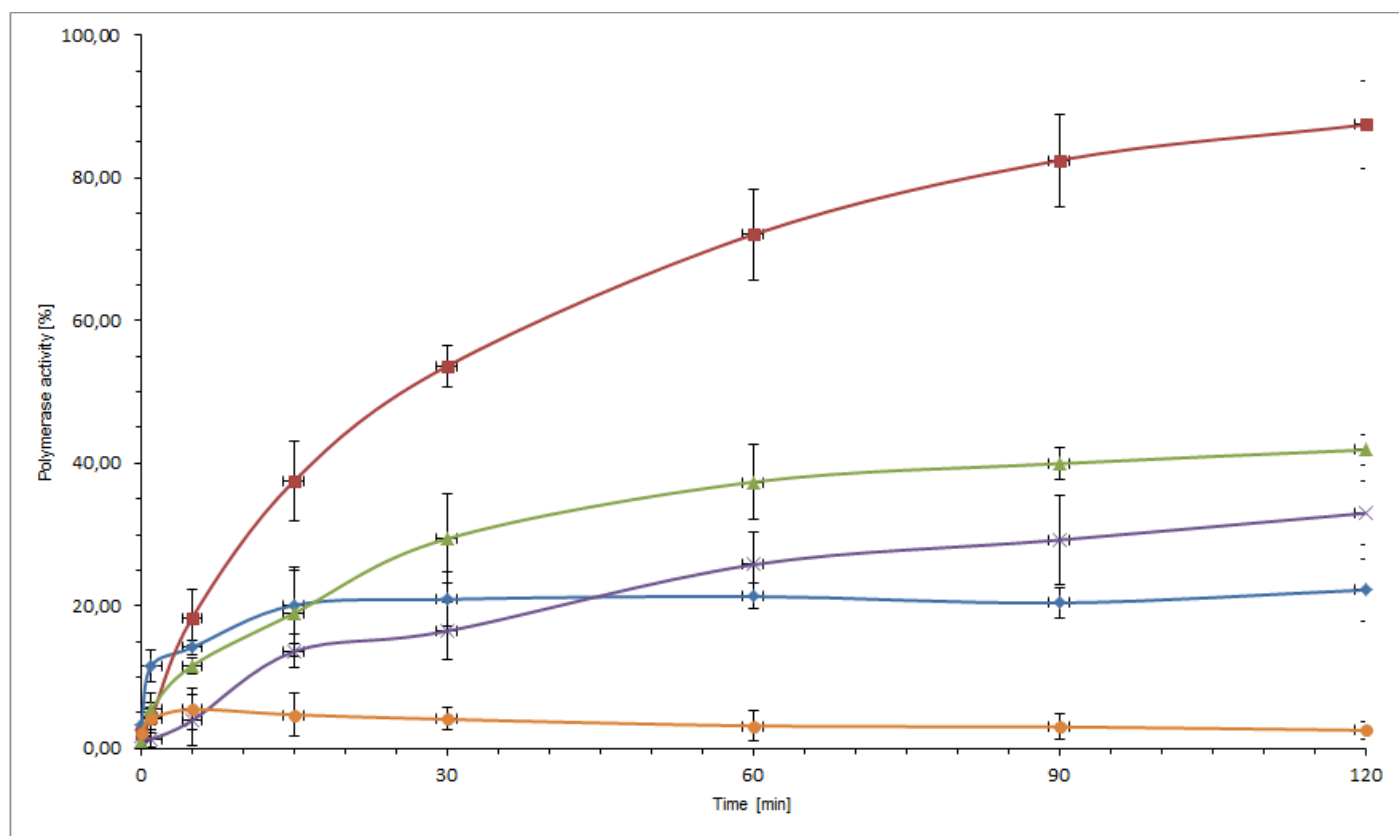

B.

- Control 1
- dU-1
- dU 0
- dU +1
- dU +4
- dU -4

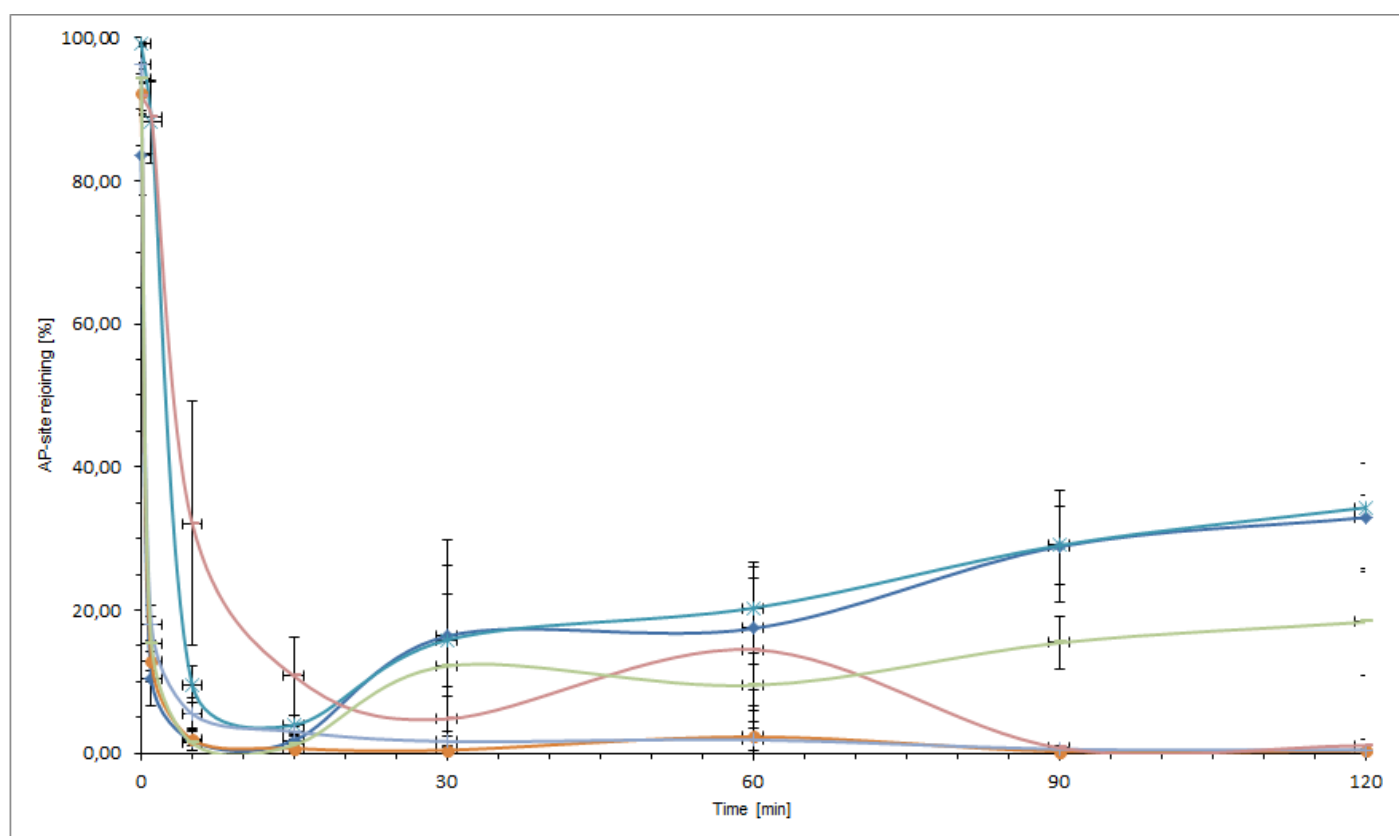



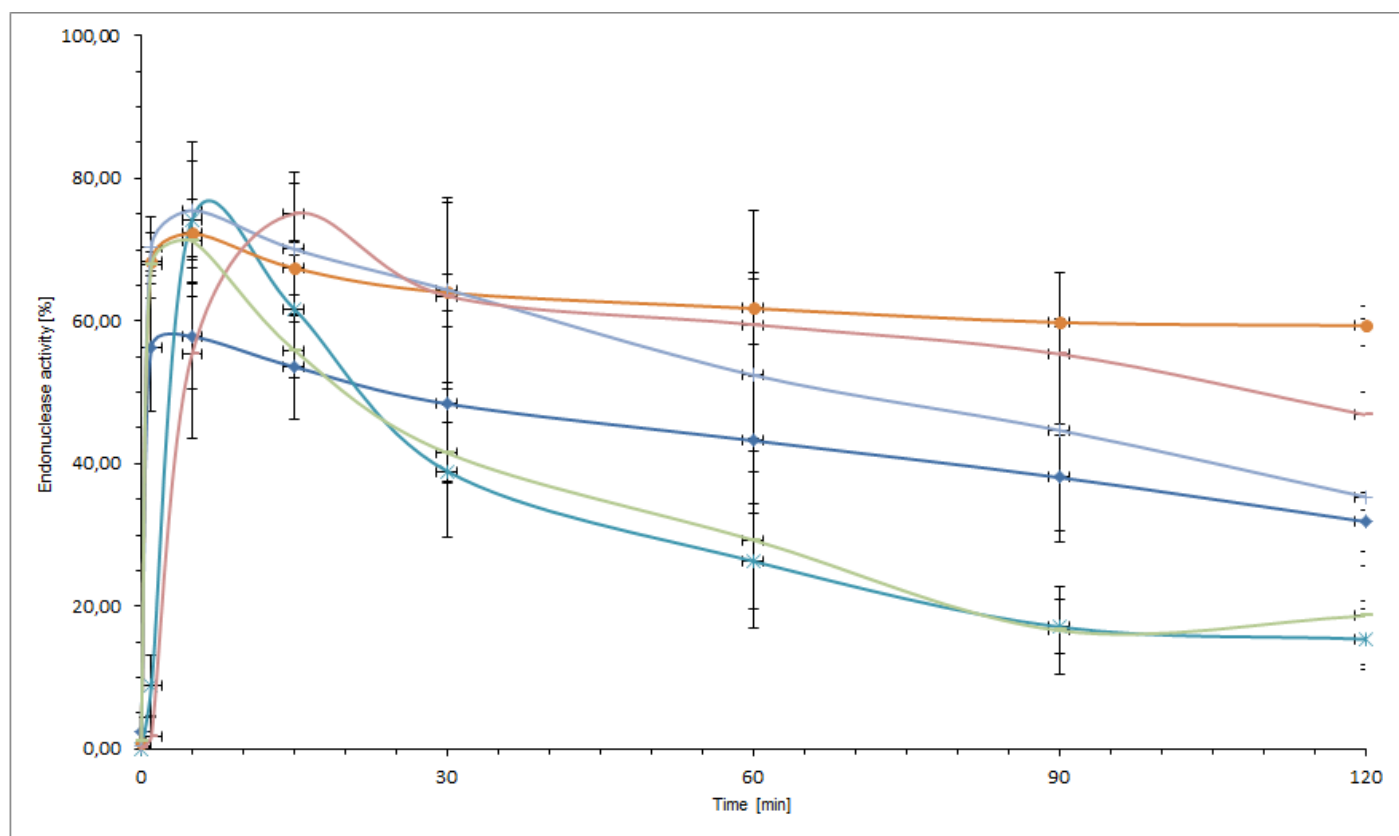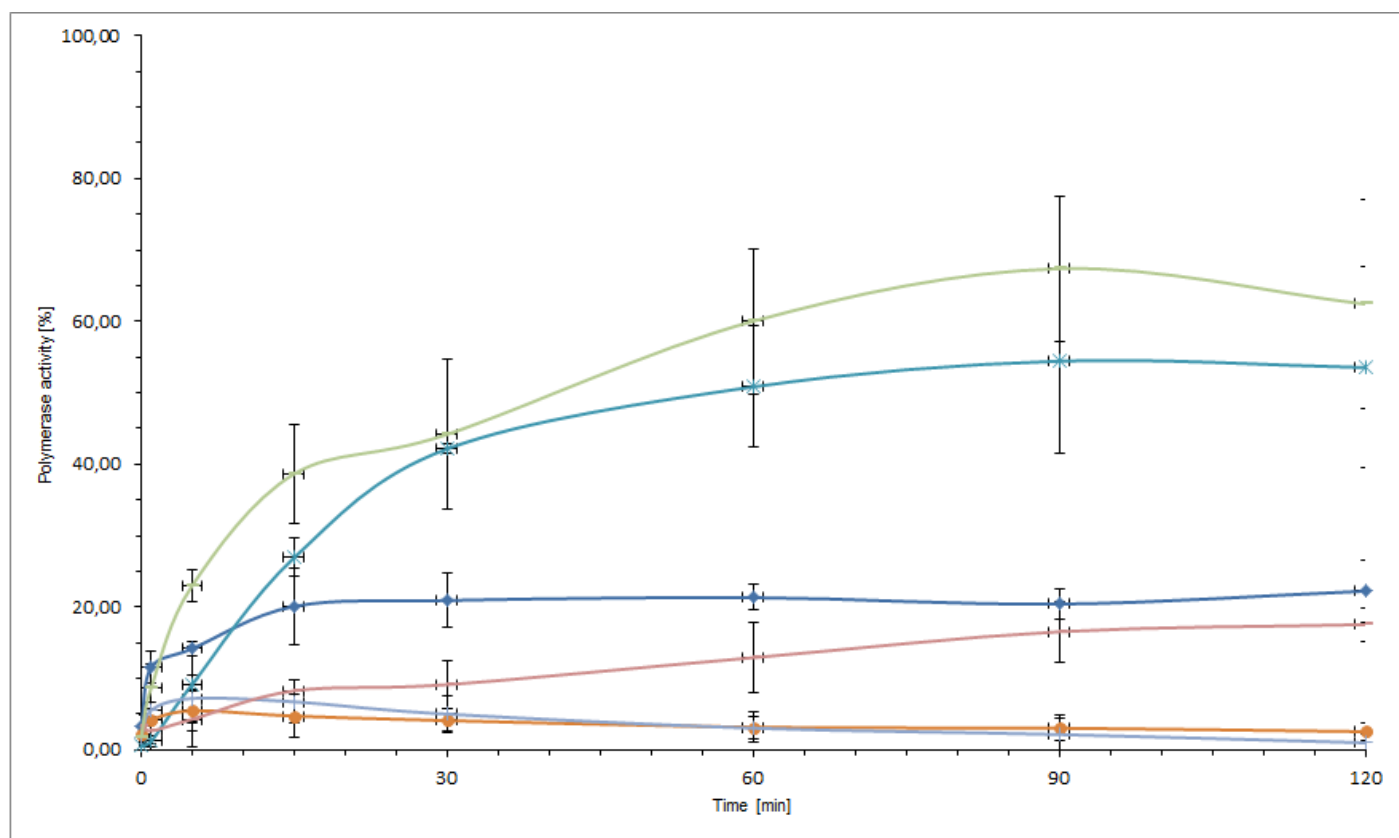

**Figure S5.** Graphical representation of DNA repair assays' results for **ScdA** – XPC Nuclear Extract. **(A)** ss-CDL, **(B)** ds-CDL

**Table S2.** Raw numerical data – Control 1 – XPC Nuclear Extract. \* rejected values

|           |          | Time [min]            |        |        |        |       |       |        |        |
|-----------|----------|-----------------------|--------|--------|--------|-------|-------|--------|--------|
|           |          | 0                     | 1      | 5      | 15     | 30    | 60    | 90     | 120    |
| Strand    | Data set | AP site rejoining [%] |        |        |        |       |       |        |        |
| Control 1 | 1.       | 85,02                 | 5,49   | 1,23   | 1,20   | 3,40  | 8,83  | 16,75  | 21,67  |
|           | 2.       | 75,90                 | 13,68  | 4,06   | 3,27   | 4,23  | 9,54  | 12,94* | 17,60* |
|           | 3.       | 67,09*                | 28,76* | 12,53* | 12,43* | 28,18 | 23,19 | 30,46  | 29,81  |
|           | 4.       | 85,96                 | 12,80  | 1,41   | 2,18   | 32,51 | 29,20 | 35,99  | 39,58  |
|           | 5.       | 80,66                 | 13,17  | 1,19   | 1,55   | 13,60 | 22,32 | 35,02  | 40,21  |
|           | 6.       | 90,74                 | 7,04   | 0,64   | 0,82   | 2,36* | 11,54 | 26,22  | 33,53  |
|           | Avg      | 83,65                 | 10,44  | 1,70   | 1,80   | 16,39 | 17,44 | 28,89  | 32,96  |
|           | SD       | 5,62                  | 3,86   | 1,35   | 0,96   | 13,45 | 8,56  | 7,83   | 7,65   |

|           |          | Time [min]                |        |        |        |        |        |        |        |
|-----------|----------|---------------------------|--------|--------|--------|--------|--------|--------|--------|
|           |          | 0                         | 1      | 5      | 15     | 30     | 60     | 90     | 120    |
| Strand    | Data set | Endonuclease activity [%] |        |        |        |        |        |        |        |
| Control 1 | 1.       | 1,40                      | 60,30  | 60,14  | 56,12  | 53,75  | 46,34  | 40,28  | 31,91  |
|           | 2.       | 5,75                      | 55,95  | 59,50  | 57,26  | 57,07  | 48,12  | 45,53  | 36,20  |
|           | 3.       | 16,12*                    | 24,92* | 27,83* | 27,65* | 22,10* | 24,66* | 20,69* | 20,99* |
|           | 4.       | 0,49                      | 53,91  | 54,84  | 48,48  | 36,20  | 33,51  | 30,23  | 26,88  |
|           | 5.       | 2,83                      | 43,46  | 47,43  | 43,79  | 37,20  | 34,31  | 29,93  | 28,78  |
|           | 6.       | 1,32                      | 67,99  | 67,25  | 62,24  | 57,81  | 53,91  | 44,39  | 35,66  |
|           | Avg      | 2,36                      | 56,32  | 57,83  | 53,58  | 48,40  | 43,24  | 38,07  | 31,89  |
|           | SD       | 2,07                      | 8,99   | 7,31   | 7,36   | 10,80  | 8,97   | 7,56   | 4,11   |

|           |          | Time [min]              |       |       |       |       |       |       |       |
|-----------|----------|-------------------------|-------|-------|-------|-------|-------|-------|-------|
|           |          | 0                       | 1     | 5     | 15    | 30    | 60    | 90    | 120   |
| Strand    | Data set | Polymerase activity [%] |       |       |       |       |       |       |       |
| Control 1 | 1.       | 5,64                    | 12,47 | 13,04 | 16,47 | 18,49 | 22,57 | 21,81 | 27,80 |
|           | 2.       | 3,42                    | 12,35 | 12,88 | 13,84 | 15,81 | 19,40 | 23,31 | 25,67 |
|           | 3.       | 11,20*                  | 10,08 | 14,43 | 16,34 | 20,69 | 21,62 | 18,14 | 18,68 |
|           | 4.       | 1,64                    | 7,96  | 14,65 | 26,20 | 19,81 | 20,89 | 19,65 | 20,47 |
|           | 5.       | 4,15                    | 13,46 | 15,43 | 26,03 | 26,21 | 23,97 | 18,93 | 19,70 |
|           | 6.       | 1,86                    | 13,40 | 14,67 | 21,74 | 24,59 | 19,60 | 18,47 | 17,57 |
|           | Avg      | 3,34                    | 11,62 | 14,18 | 20,11 | 20,93 | 21,34 | 20,44 | 22,24 |
|           | SD       | 1,66                    | 2,17  | 1,01  | 5,32  | 3,87  | 1,76  | 2,06  | 4,30  |

**Table S3.** Raw numerical data – ScdA – XPC Nuclear Extract.

| ScdA    |          | Time [min]            |       |        |       |        |        |       |       |
|---------|----------|-----------------------|-------|--------|-------|--------|--------|-------|-------|
|         |          | 0                     | 1     | 5      | 15    | 30     | 60     | 90    | 120   |
| Strand  | Data set | AP site rejoining [%] |       |        |       |        |        |       |       |
| dU0     | 1.       | 91,10                 | 11,48 | 0,71   | 0,26  | 0,15   | 0,10   | 0,02  | 0,09  |
|         | 2.       | 95,97                 | 10,96 | 1,25   | 0,59  | 0,36   | 0,27   | 0,29  | 0,50  |
|         | 3.       | 89,98                 | 16,10 | 3,75   | 1,18  | 0,81   | 6,51   | 0,44  | 0,43  |
|         | Avg      | 92,35                 | 12,85 | 1,90   | 0,68  | 0,44   | 2,29   | 0,25  | 0,34  |
|         | SD       | 3,19                  | 2,83  | 1,62   | 0,46  | 0,34   | 3,65   | 0,21  | 0,22  |
| dU-5    | 1.       | 93,19                 | 2,40  | 0,17   | 0,12  | 0,20   | 1,12   | 0,98  | 1,38  |
|         | 2.       | 97,13                 | 1,86  | 0,45   | 0,25  | 0,40   | 1,22   | 1,95  | 2,36  |
|         | 3.       | 92,90                 | 4,18  | 0,89   | 0,61  | 0,63   | 0,94   | 1,14  | 2,39  |
|         | Avg      | 94,41                 | 2,81  | 0,50   | 0,33  | 0,41   | 1,09   | 1,36  | 2,04  |
|         | SD       | 2,36                  | 1,22  | 0,37   | 0,26  | 0,21   | 0,14   | 0,52  | 0,57  |
| dU-5/+5 | 1.       | 99,78                 | 0,37  | 0,01   | 0,01  | 0,11   | 0,37   | 0,00  | 0,00  |
|         | 2.       | 97,30                 | 0,90  | 0,03   | 0,00  | 0,00   | 0,00   | 0,01  | 0,00  |
|         | 3.       | 93,33                 | 1,25  | 0,29   | 0,11  | 0,09   | 0,03   | 0,02  | 0,03  |
|         | Avg      | 96,80                 | 0,84  | 0,11   | 0,04  | 0,07   | 0,14   | 0,01  | 0,01  |
|         | SD       | 3,25                  | 0,44  | 0,16   | 0,06  | 0,06   | 0,21   | 0,01  | 0,02  |
| dU+5    | 1.       | 96,77                 | 91,42 | 24,99  | 1,99  | 0,39   | 0,08   | 0,05  | 0,04  |
|         | 2.       | 97,78                 | 92,53 | 54,80* | 2,81  | 1,15   | 0,19   | 0,12  | 0,12  |
|         | 3.       | 93,82                 | 91,54 | 25,79  | 1,98  | 0,71   | 13,04* | 0,47  | 0,32  |
|         | Avg      | 96,12                 | 91,83 | 25,39  | 2,26  | 0,75   | 0,13   | 0,21  | 0,16  |
|         | SD       | 2,06                  | 0,61  | 0,56   | 0,48  | 0,39   | 0,07   | 0,22  | 0,14  |
| dU-1    | 1.       | 99,26                 | 81,66 | 7,73   | 5,17  | 11,25  | 24,78  | 32,89 | 35,50 |
|         | 2.       | 99,17                 | 91,42 | 12,52  | 2,55  | 2,60*  | 4,39*  | 7,15* | 4,69* |
|         | 3.       | 98,95                 | 91,41 | 8,58   | 4,16  | 20,43  | 15,82  | 25,23 | 33,18 |
|         | Avg      | 99,13                 | 88,16 | 9,61   | 3,96  | 15,84  | 20,30  | 29,06 | 34,34 |
|         | SD       | 0,16                  | 5,63  | 2,56   | 1,32  | 6,49   | 6,34   | 5,42  | 1,64  |
| dU-4    | 1.       | 93,89                 | 19,34 | 1,83   | 2,12  | 22,16  | 7,47   | 18,05 | 12,98 |
|         | 2.       | 92,13                 | 14,55 | 1,07   | 0,47  | 0,67*  | 2,10*  | 2,63* | 3,50* |
|         | 3.       | 96,59                 | 12,05 | 1,22   | 0,89  | 2,23   | 11,50  | 12,82 | 23,69 |
|         | Avg      | 94,20                 | 15,31 | 1,38   | 1,16  | 12,20  | 9,49   | 15,43 | 18,33 |
|         | SD       | 2,25                  | 3,70  | 0,40   | 0,86  | 14,10  | 2,85   | 3,69  | 7,57  |
| dU+1    | 1.       | 99,21                 | 16,28 | 4,00   | 2,46  | 1,56   | 1,07   | 0,63  | 0,51  |
|         | 2.       | 94,67                 | 21,02 | 8,11   | 2,92  | 1,10   | 3,68   | 0,36  | 0,29  |
|         | 3.       | 95,00                 | 16,50 | 4,39   | 3,65  | 2,32   | 0,92   | 0,72  | 0,57  |
|         | Avg      | 96,29                 | 17,93 | 5,50   | 3,01  | 1,66   | 1,89   | 0,57  | 0,46  |
|         | SD       | 2,53                  | 2,67  | 2,26   | 0,60  | 0,62   | 1,55   | 0,19  | 0,15  |
| dU+4    | 1.       | 91,29                 | 83,09 | 20,01  | 8,90  | 2,55   | 19,29  | 0,77  | 0,78  |
|         | 2.       | 90,16                 | 91,06 | 44,23  | 16,83 | 7,05   | 2,99   | 0,94  | 2,02  |
|         | 3.       | 93,75                 | 92,78 | 93,79* | 6,53  | 43,48* | 21,18  | 0,57  | 0,46  |
|         | Avg      | 91,73                 | 88,98 | 32,12  | 10,76 | 4,80   | 14,48  | 0,76  | 1,09  |
|         | SD       | 1,84                  | 5,17  | 17,12  | 5,40  | 3,18   | 10,00  | 0,18  | 0,82  |

\* rejected values

| ScdA    |          | Time [min]                |       |       |        |        |        |        |        |
|---------|----------|---------------------------|-------|-------|--------|--------|--------|--------|--------|
|         |          | 0                         | 1     | 5     | 15     | 30     | 60     | 90     | 120    |
| Strand  | Data set | Endonuclease activity [%] |       |       |        |        |        |        |        |
| dU0     | 1.       | 1,69                      | 69,81 | 70,71 | 65,06  | 63,99  | 58,22  | 59,32  | 62,11  |
|         | 2.       | 0,34                      | 67,26 | 70,19 | 65,52  | 61,31  | 59,67  | 60,41  | 56,59  |
|         | 3.       | 0,57                      | 67,88 | 75,95 | 71,69  | 66,66  | 67,41  | 59,66  | 59,39  |
|         | Avg      | 0,87                      | 68,31 | 72,28 | 67,43  | 63,98  | 61,77  | 59,80  | 59,36  |
|         | SD       | 0,72                      | 1,33  | 3,19  | 3,70   | 2,67   | 4,94   | 0,56   | 2,76   |
| dU-5    | 1.       | 0,00                      | 92,32 | 79,89 | 59,01  | 43,35  | 20,68  | 11,31  | 4,84   |
|         | 2.       | 0,00                      | 90,44 | 75,63 | 55,58  | 42,37  | 23,49  | 11,32  | 8,05   |
|         | 3.       | 0,55                      | 86,57 | 80,64 | 65,53  | 47,14  | 32,11  | 21,96  | 15,15  |
|         | Avg      | 0,18                      | 89,78 | 78,72 | 60,04  | 44,29  | 25,42  | 14,86  | 9,35   |
|         | SD       | 0,32                      | 2,93  | 2,70  | 5,05   | 2,52   | 5,96   | 6,15   | 5,28   |
| dU-5/+5 | 1.       | 0,00                      | 91,18 | 83,16 | 78,48  | 64,48  | 55,07  | 51,04  | 51,13  |
|         | 2.       | 0,00                      | 83,94 | 78,30 | 66,59  | 56,16  | 47,71  | 44,51  | 43,60  |
|         | 3.       | 0,97                      | 89,00 | 84,16 | 79,47  | 71,18  | 62,71  | 58,11  | 53,68  |
|         | Avg      | 0,32                      | 88,04 | 81,87 | 74,85  | 63,94  | 55,16  | 51,22  | 49,47  |
|         | SD       | 0,56                      | 3,72  | 3,13  | 7,17   | 7,52   | 7,50   | 6,80   | 5,24   |
| dU+5    | 1.       | 0,13                      | 3,80  | 61,68 | 67,31  | 59,48  | 48,91  | 40,99  | 37,48  |
|         | 2.       | 0,60                      | 3,98  | 38,56 | 71,92  | 69,22  | 57,93  | 52,69  | 47,71  |
|         | 3.       | 0,42                      | 2,20  | 64,60 | 81,39  | 75,82  | 50,83  | 54,11  | 52,58  |
|         | Avg      | 0,38                      | 3,33  | 54,95 | 73,54  | 68,17  | 52,56  | 49,26  | 45,93  |
|         | SD       | 0,24                      | 0,98  | 14,26 | 7,18   | 8,22   | 4,75   | 7,20   | 7,70   |
| dU-1    | 1.       | 0,00                      | 13,78 | 61,83 | 50,66  | 34,87  | 22,83  | 16,78  | 14,98  |
|         | 2.       | 0,02                      | 6,69  | 79,82 | 67,52  | 49,63  | 34,02  | 21,06  | 19,84  |
|         | 3.       | 0,01                      | 6,10  | 81,07 | 66,91  | 32,35  | 22,13  | 13,52  | 11,38  |
|         | Avg      | 0,01                      | 8,86  | 74,24 | 61,69  | 38,95  | 26,33  | 17,12  | 15,40  |
|         | SD       | 0,01                      | 4,27  | 10,76 | 9,56   | 9,34   | 6,67   | 3,78   | 4,25   |
| dU-4    | 1.       | 0,59                      | 66,92 | 66,70 | 58,76  | 38,46  | 38,12  | 21,03  | 13,76  |
|         | 2.       | 1,87                      | 63,80 | 77,73 | 76,35* | 80,49* | 83,75* | 87,40* | 83,36* |
|         | 3.       | 0,84                      | 72,68 | 69,25 | 53,11  | 44,54  | 20,49  | 12,19  | 23,62  |
|         | Avg      | 1,10                      | 67,80 | 71,23 | 55,94  | 41,50  | 29,30  | 16,61  | 18,69  |
|         | SD       | 0,68                      | 4,50  | 5,78  | 4,00   | 4,31   | 12,46  | 6,25   | 6,97   |
| dU+1    | 1.       | 0,00                      | 70,90 | 70,60 | 60,77  | 52,78  | 39,42  | 29,72  | 20,11  |
|         | 2.       | 0,70                      | 66,03 | 72,46 | 70,06  | 62,03  | 51,42  | 43,47  | 36,64  |
|         | 3.       | 0,49                      | 74,22 | 83,50 | 79,39  | 78,38  | 66,44  | 60,85  | 49,31  |
|         | Avg      | 0,40                      | 70,38 | 75,52 | 70,07  | 64,40  | 52,42  | 44,68  | 35,35  |
|         | SD       | 0,36                      | 4,12  | 6,97  | 9,31   | 12,96  | 13,54  | 15,60  | 14,64  |
| dU+4    | 1.       | 0,00                      | 4,80  | 63,94 | 70,13  | 67,13  | 41,34  | 42,17  | 31,31  |
|         | 2.       | 0,11                      | 0,32  | 46,98 | 73,55  | 74,46  | 71,56  | 61,56  | 54,29  |
|         | 3.       | 0,25                      | 0,34  | 0,58* | 81,47  | 49,00  | 65,61  | 62,43  | 54,97  |
|         | Avg      | 0,12                      | 1,82  | 55,46 | 75,05  | 63,53  | 59,50  | 55,39  | 46,86  |
|         | SD       | 0,13                      | 2,58  | 11,99 | 5,82   | 13,11  | 16,01  | 11,45  | 13,47  |

\* rejected values

| ScdA    |          | Time [min]              |        |       |        |        |        |       |        |
|---------|----------|-------------------------|--------|-------|--------|--------|--------|-------|--------|
|         |          | 0                       | 1      | 5     | 15     | 30     | 60     | 90    | 120    |
| Strand  | Data set | Polymerase activity [%] |        |       |        |        |        |       |        |
| dU0     | 1.       | 2,86                    | 4,69   | 6,16  | 4,23   | 3,69   | 3,03   | 2,09  | 1,93   |
|         | 2.       | 0,94                    | 2,45   | 2,27  | 2,14   | 2,80   | 1,22   | 2,02  | 1,74   |
|         | 3.       | 2,84                    | 5,40   | 8,06  | 7,92   | 5,87   | 5,35   | 5,06  | 4,05   |
|         | Avg      | 2,22                    | 4,18   | 5,50  | 4,77   | 4,12   | 3,20   | 3,06  | 2,57   |
|         | SD       | 1,10                    | 1,54   | 2,95  | 2,92   | 1,58   | 2,07   | 1,74  | 1,28   |
| dU-5    | 1.       | 1,91                    | 2,17   | 17,21 | 38,97  | 54,40  | 77,25  | 86,81 | 92,91  |
|         | 2.       | 1,06                    | 4,42   | 22,64 | 42,33  | 56,12  | 73,95  | 85,60 | 88,80  |
|         | 3.       | 3,56                    | 6,46   | 15,17 | 31,35  | 50,36  | 65,01  | 75,05 | 80,71  |
|         | Avg      | 2,18                    | 4,35   | 18,34 | 37,55  | 53,63  | 72,07  | 82,49 | 87,47  |
|         | SD       | 1,27                    | 2,15   | 3,86  | 5,62   | 2,96   | 6,33   | 6,47  | 6,21   |
| dU-5/+5 | 1.       | 0,21                    | 4,50   | 12,19 | 18,27  | 29,95  | 38,26  | 37,86 | 39,43  |
|         | 2.       | 0,52                    | 8,01   | 12,36 | 25,43  | 35,44  | 42,11  | 42,41 | 43,60  |
|         | 3.       | 2,56                    | 4,08   | 10,31 | 13,28  | 22,91  | 31,77  | 39,59 | 42,62  |
|         | Avg      | 1,10                    | 5,53   | 11,62 | 18,99  | 29,43  | 37,38  | 39,95 | 41,88  |
|         | SD       | 1,27                    | 2,16   | 1,14  | 6,10   | 6,28   | 5,23   | 2,30  | 2,18   |
| dU+5    | 1.       | 2,35                    | 1,78   | 6,90  | 15,57  | 21,01  | 27,84  | 32,89 | 36,18  |
|         | 2.       | 0,00                    | 0,00   | 0,00  | 14,30  | 13,79  | 20,44  | 22,02 | 28,02  |
|         | 3.       | 2,62                    | 2,31   | 4,93  | 11,01  | 14,67  | 29,08  | 32,84 | 34,86  |
|         | Avg      | 1,66                    | 1,36   | 3,95  | 13,63  | 16,49  | 25,79  | 29,25 | 33,02  |
|         | SD       | 1,44                    | 1,21   | 3,55  | 2,35   | 3,94   | 4,67   | 6,26  | 4,38   |
| dU-1    | 1.       | 0,74                    | 2,14   | 15,29 | 29,92  | 41,56  | 41,04  | 40,96 | 41,42  |
|         | 2.       | 0,54                    | 0,84   | 5,55  | 26,08  | 42,80  | 55,81  | 66,70 | 69,01  |
|         | 3.       | 0,37                    | 0,79   | 6,71  | 24,80  | 42,14  | 55,69  | 55,69 | 50,18  |
|         | Avg      | 0,55                    | 1,26   | 9,18  | 26,93  | 42,17  | 50,85  | 54,45 | 53,54  |
|         | SD       | 0,18                    | 0,76   | 5,32  | 2,67   | 0,62   | 8,49   | 12,91 | 14,10  |
| dU-4    | 1.       | 1,48                    | 6,42   | 21,47 | 33,76  | 36,81  | 52,85  | 60,23 | 72,82  |
|         | 2.       | 5,41*                   | 14,30* | 7,69* | 12,25* | 11,92* | 10,58* | 6,91* | 10,73* |
|         | 3.       | 2,18                    | 11,14  | 24,56 | 43,55  | 51,57  | 67,24  | 74,57 | 52,04  |
|         | Avg      | 1,83                    | 8,78   | 23,01 | 38,65  | 44,19  | 60,05  | 67,40 | 62,43  |
|         | SD       | 0,50                    | 3,33   | 2,19  | 6,93   | 10,44  | 10,17  | 10,14 | 14,69  |
| dU+1    | 1.       | 0,79                    | 5,43   | 7,41  | 5,57   | 3,09   | 1,39   | 0,27  | 0,00   |
|         | 2.       | 1,78                    | 6,69   | 10,28 | 10,12  | 7,93   | 4,49   | 4,52  | 2,33   |
|         | 3.       | 2,72                    | 4,65   | 3,97  | 4,54   | 4,05   | 3,30   | 1,72  | 0,68   |
|         | Avg      | 1,76                    | 5,59   | 7,22  | 6,74   | 5,02   | 3,06   | 2,17  | 1,00   |
|         | SD       | 0,96                    | 1,03   | 3,16  | 2,97   | 2,56   | 1,56   | 2,16  | 1,20   |
| dU+4    | 1.       | 4,76                    | 4,40   | 8,89  | 9,14   | 12,63  | 18,43  | 21,32 | 20,13  |
|         | 2.       | 1,66                    | 0,93   | 2,52  | 6,49   | 8,80   | 11,54  | 15,15 | 17,18  |
|         | 3.       | 3,61                    | 2,72   | 1,53  | 9,25   | 6,08   | 8,81   | 13,22 | 15,41  |
|         | Avg      | 3,34                    | 2,68   | 4,31  | 8,29   | 9,17   | 12,93  | 16,56 | 17,57  |
|         | SD       | 1,57                    | 1,73   | 3,99  | 1,56   | 3,29   | 4,96   | 4,23  | 2,38   |

\* rejected values

A.

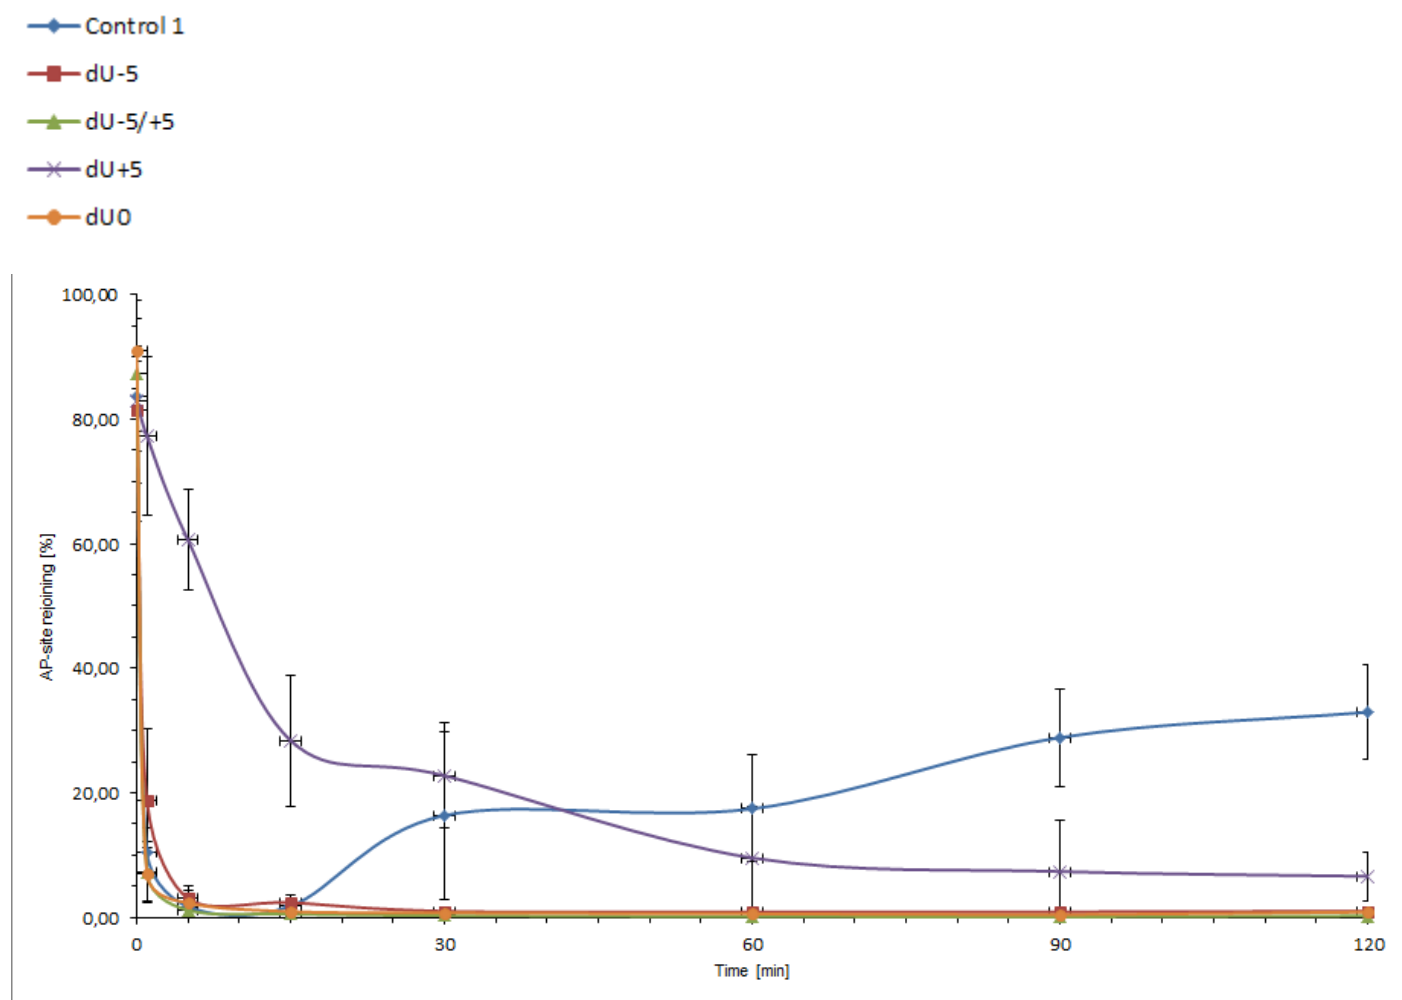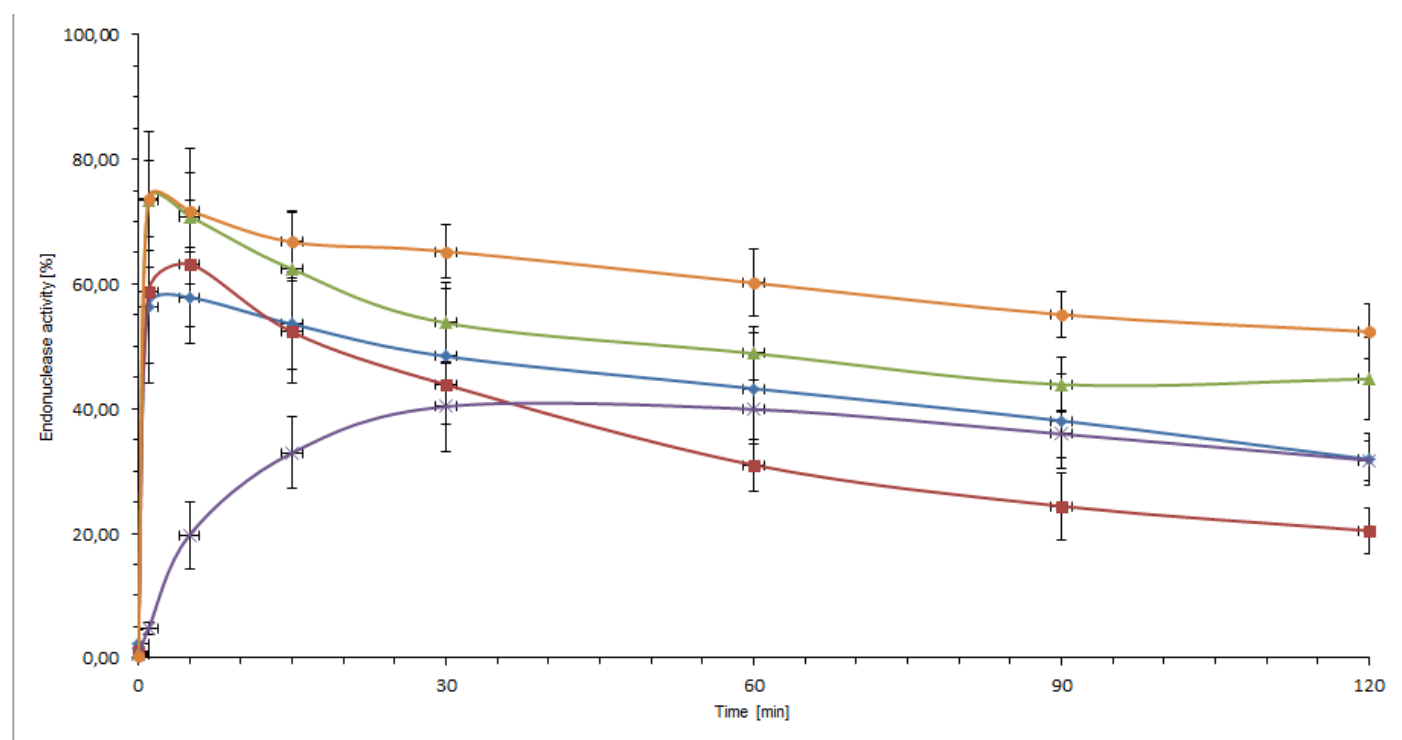

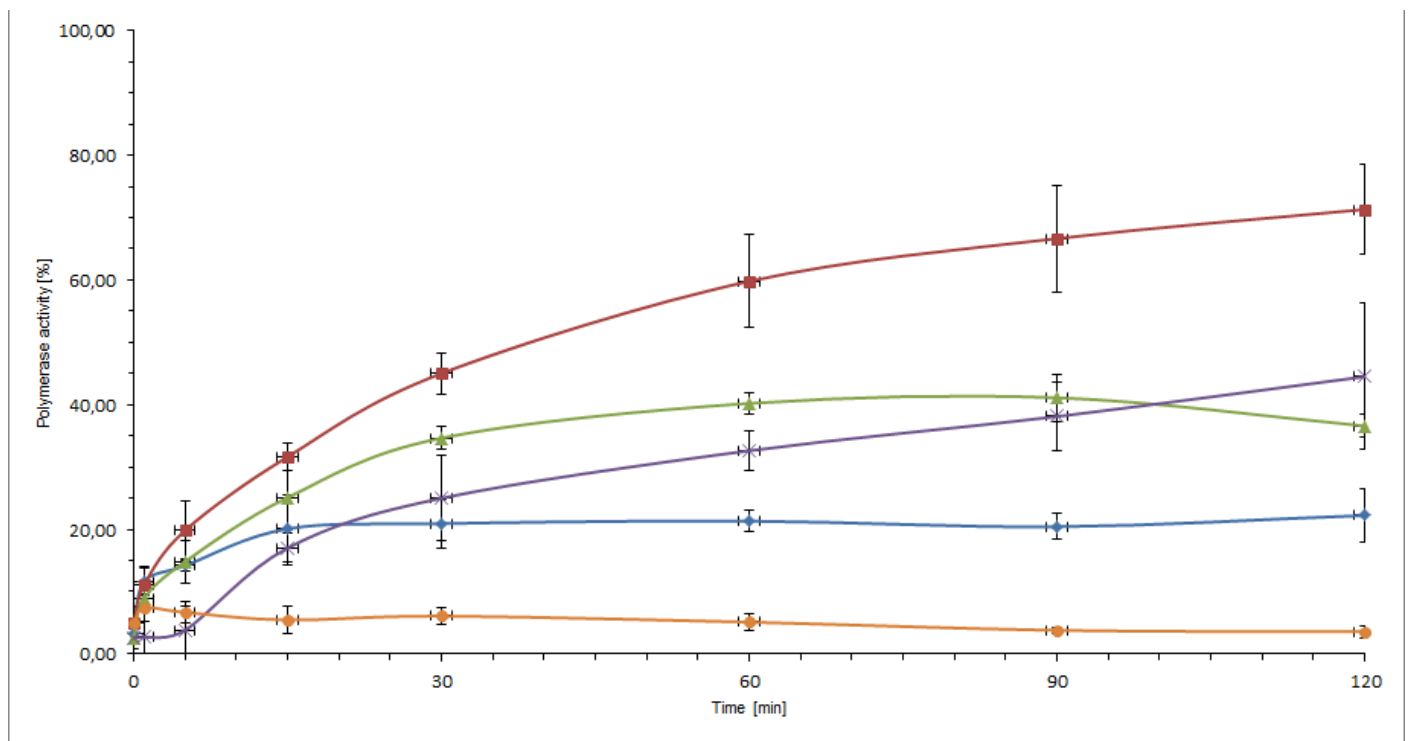

B.

- Control 1
- dU-1
- dU 0
- dU +1
- dU +4
- dU -4

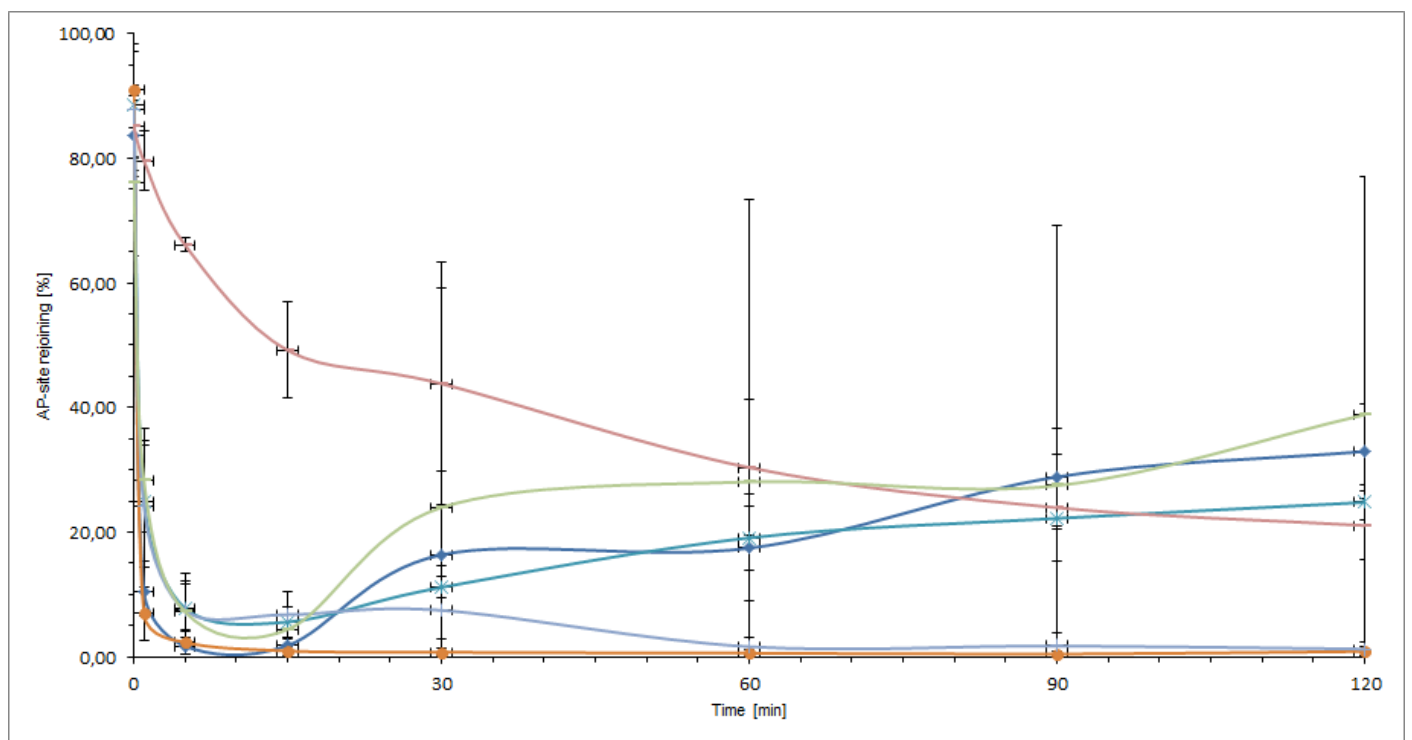

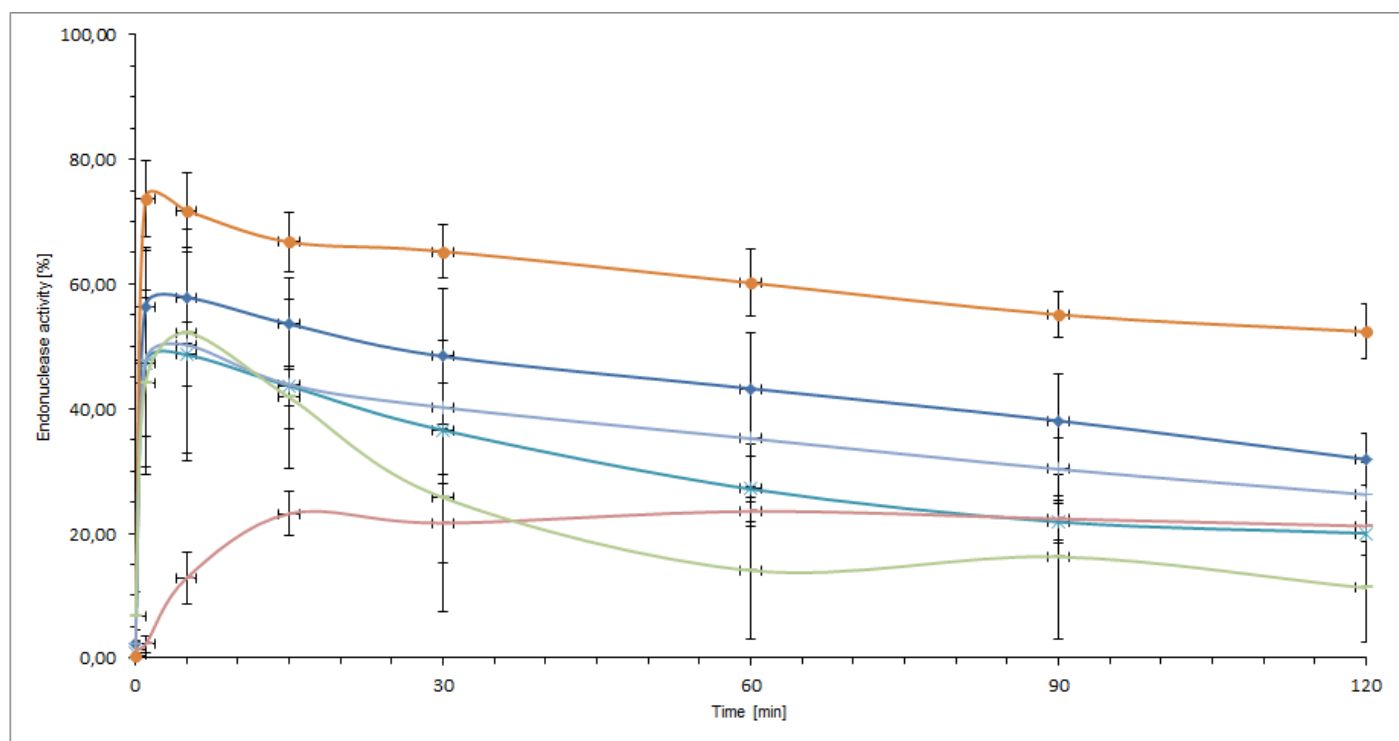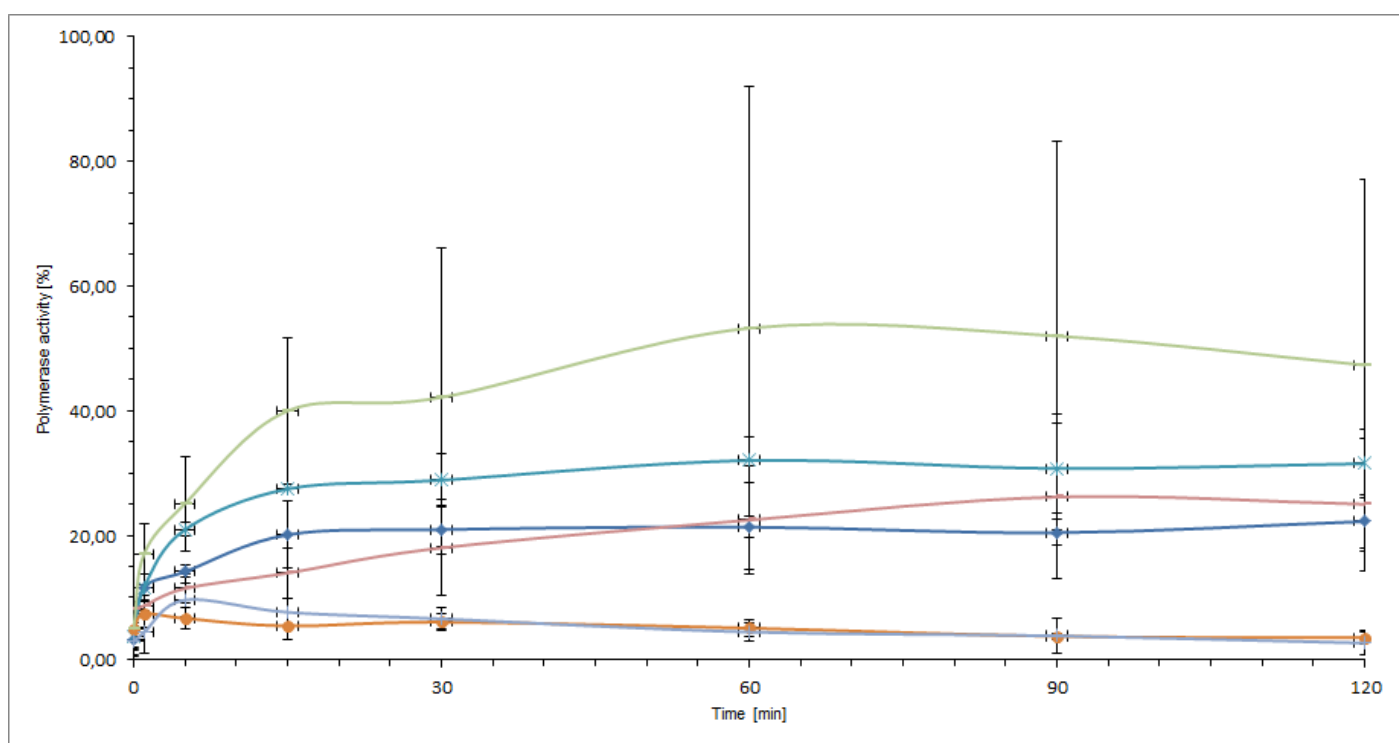

**Figure S6.** Graphical representation of DNA repair assays' results for **RcdA** – XPC Nuclear Extract. **(A)** ss-CDL, **(B)** ds-CDL



**Table S3.** Raw numerical data – RcdA – XPC Nuclear Extract.

| RcdA    |          | Time [min]            |        |        |        |        |        |        |        |
|---------|----------|-----------------------|--------|--------|--------|--------|--------|--------|--------|
|         |          | 0                     | 1      | 5      | 15     | 30     | 60     | 90     | 120    |
| Strand  | Data set | AP site rejoining [%] |        |        |        |        |        |        |        |
| dU0     | 1.       | 90,46                 | 2,40   | 0,22   | 0,06   | 0,10   | 0,07   | 0,01   | 0,00   |
|         | 2.       | 91,61                 | 7,20   | 4,09   | 1,48   | 1,13   | 1,07   | 0,61   | 1,32   |
|         | 3.       | 57,24*                | 11,12  | 2,71   | 1,27   | 0,92   | 0,61   | 0,65   | 1,28   |
|         | Avg      | 91,03                 | 6,91   | 2,34   | 0,94   | 0,72   | 0,58   | 0,43   | 0,87   |
|         | SD       | 0,82                  | 4,37   | 1,96   | 0,77   | 0,54   | 0,50   | 0,36   | 0,75   |
| dU-5    | 1.       | 95,64                 | 5,41   | 0,84   | 3,73   | 0,31   | 0,18   | 0,25   | 0,38   |
|         | 2.       | 86,97                 | 26,63  | 3,75   | 1,77   | 1,36   | 1,36   | 1,48   | 1,07   |
|         | 3.       | 61,41                 | 23,93  | 4,62   | 1,61   | 1,29   | 1,03   | 0,89   | 1,54   |
|         | Avg      | 81,34                 | 18,66  | 3,07   | 2,37   | 0,99   | 0,86   | 0,88   | 1,00   |
|         | SD       | 17,79                 | 11,55  | 1,98   | 1,18   | 0,59   | 0,61   | 0,62   | 0,59   |
| dU-5/+5 | 1.       | 96,92                 | 1,55   | 0,29   | 0,13   | 0,09   | 0,03   | 0,00   | 0,00   |
|         | 2.       | 92,17                 | 9,35   | 1,20   | 0,32   | 0,10   | 0,00   | 0,00   | 0,00   |
|         | 3.       | 73,08                 | 10,67  | 2,00   | 1,16   | 0,65   | 0,30   | 0,20   | 0,72   |
|         | Avg      | 87,39                 | 7,19   | 1,16   | 0,54   | 0,28   | 0,11   | 0,07   | 0,24   |
|         | SD       | 12,62                 | 4,93   | 0,86   | 0,54   | 0,32   | 0,16   | 0,12   | 0,41   |
| dU+5    | 1.       | 91,50                 | 84,53  | 61,14  | 17,02  | 20,31  | 3,31   | 1,50   | 2,10   |
|         | 2.       | 89,52                 | 84,62  | 68,32  | 37,78  | 32,23  | 19,00  | 16,83  | 9,44   |
|         | 3.       | 67,79                 | 62,65  | 52,32  | 30,40  | 15,76  | 6,33   | 3,78   | 8,25   |
|         | Avg      | 82,94                 | 77,27  | 60,59  | 28,40  | 22,76  | 9,55   | 7,37   | 6,59   |
|         | SD       | 13,15                 | 12,66  | 8,02   | 10,52  | 8,51   | 8,32   | 8,27   | 3,94   |
| dU-1    | 1.       | 93,82                 | 18,07  | 5,14   | 3,86   | 9,95   | 19,03  | 21,66  | 23,33  |
|         | 2.       | 78,70                 | 31,75  | 10,46  | 7,31   | 12,33  | 13,96  | 24,12  | 22,97  |
|         | 3.       | 93,02                 | 85,84* | 83,67* | 83,29* | 18,14* | 24,30  | 20,85  | 28,04  |
|         | Avg      | 88,51                 | 24,91  | 7,80   | 5,59   | 11,14  | 19,10  | 22,21  | 24,78  |
|         | SD       | 8,51                  | 9,68   | 3,76   | 2,44   | 1,68   | 5,17   | 1,70   | 2,83   |
| dU-4    | 1.       | 86,26                 | 21,79  | 2,70   | 1,10   | 0,87   | 0,55   | 0,63   | 25,06  |
|         | 2.       | 63,23                 | 37,63  | 12,47  | 8,23   | 6,67   | 3,33   | 6,16   | 9,49   |
|         | 3.       | 78,57                 | 25,59  | 6,40   | 3,87   | 64,40  | 80,35  | 75,64  | 82,05  |
|         | Avg      | 76,02                 | 28,33  | 7,19   | 4,40   | 23,98  | 28,08  | 27,48  | 38,87  |
|         | SD       | 11,72                 | 8,27   | 4,93   | 3,59   | 35,12  | 45,29  | 41,80  | 38,20  |
| dU+1    | 1.       | 94,84                 | 18,21  | 3,10   | 10,42  | 15,46  | 0,46   | 0,00   | 0,00   |
|         | 2.       | 75,44                 | 35,50  | 14,07  | 6,99   | 4,82   | 3,11   | 4,18   | 2,42   |
|         | 3.       | 93,02                 | 18,60  | 5,14   | 2,90   | 2,11   | 1,31   | 1,07   | 1,32   |
|         | Avg      | 87,77                 | 24,10  | 7,44   | 6,77   | 7,46   | 1,63   | 1,75   | 1,25   |
|         | SD       | 10,71                 | 9,87   | 5,83   | 3,77   | 7,06   | 1,35   | 2,17   | 1,21   |
| dU+4    | 1.       | 88,54                 | 82,99  | 66,92  | 54,68  | 57,64  | 38,07  | 29,94  | 24,99  |
|         | 2.       | 47,44*                | 47,18* | 40,37* | 39,95* | 33,47* | 34,11* | 30,39* | 25,17* |
|         | 3.       | 81,76                 | 76,16  | 65,29  | 43,72  | 30,02  | 22,67  | 17,91  | 17,14  |
|         | Avg      | 85,15                 | 79,57  | 66,10  | 49,20  | 43,83  | 30,37  | 23,92  | 21,07  |
|         | SD       | 4,79                  | 4,83   | 1,15   | 7,74   | 19,53  | 10,89  | 8,51   | 5,55   |

\* rejected values

| RcdA    |          | Time [min]                |        |        |        |        |        |        |        |
|---------|----------|---------------------------|--------|--------|--------|--------|--------|--------|--------|
|         |          | 0                         | 1      | 5      | 15     | 30     | 60     | 90     | 120    |
| Strand  | Data set | Endonuclease activity [%] |        |        |        |        |        |        |        |
| dU0     | 1.       | 0,46                      | 78,10  | 75,98  | 70,10  | 68,23  | 63,99  | 57,73  | 55,46  |
|         | 2.       | 0,30                      | 69,42  | 67,51  | 63,37  | 62,25  | 56,40  | 52,43  | 49,23  |
|         | 3.       | 10,45*                    | 53,09* | 50,62* | 47,04* | 48,71* | 41,07* | 40,32* | 37,28* |
|         | Avg      | 0,38                      | 73,76  | 71,75  | 66,74  | 65,24  | 60,20  | 55,08  | 52,35  |
|         | SD       | 0,11                      | 6,14   | 5,99   | 4,76   | 4,23   | 5,37   | 3,75   | 4,40   |
| dU-5    | 1.       | 0,18                      | 74,22  | 69,05  | 54,72  | 44,15  | 26,51  | 21,04  | 17,72  |
|         | 2.       | 0,38                      | 56,53  | 69,04  | 59,01  | 47,04  | 31,79  | 21,49  | 19,00  |
|         | 3.       | 2,66                      | 45,42  | 51,55  | 43,21  | 40,38  | 34,64  | 30,58  | 24,54  |
|         | Avg      | 1,07                      | 58,73  | 63,21  | 52,31  | 43,86  | 30,98  | 24,37  | 20,42  |
|         | SD       | 1,38                      | 14,52  | 10,10  | 8,17   | 3,34   | 4,12   | 5,39   | 3,62   |
| dU-5/+5 | 1.       | 0,00                      | 85,65  | 80,49  | 70,63  | 59,46  | 49,93  | 48,43  | 52,25  |
|         | 2.       | 0,22                      | 70,49  | 72,88  | 64,33  | 55,01  | 52,41  | 43,56  | 42,26  |
|         | 3.       | 2,23                      | 64,37  | 59,21  | 52,21  | 46,79  | 44,25  | 39,63  | 39,85  |
|         | Avg      | 0,81                      | 73,51  | 70,86  | 62,39  | 53,75  | 48,87  | 43,87  | 44,79  |
|         | SD       | 1,23                      | 10,96  | 10,78  | 9,36   | 6,43   | 4,18   | 4,41   | 6,58   |
| dU+5    | 1.       | 0,27                      | 4,69   | 25,59  | 60,42* | 48,47  | 49,74  | 40,30  | 32,43  |
|         | 2.       | 1,26                      | 5,59   | 18,66  | 37,03  | 37,44  | 34,19  | 33,49  | 34,48  |
|         | 3.       | 0,23                      | 3,75   | 14,92  | 28,81  | 35,12  | 35,78  | 34,04  | 28,22  |
|         | Avg      | 0,59                      | 4,68   | 19,73  | 32,92  | 40,35  | 39,90  | 35,94  | 31,71  |
|         | SD       | 0,58                      | 0,92   | 5,41   | 5,81   | 7,13   | 8,56   | 3,78   | 3,19   |
| dU-1    | 1.       | 0,38                      | 55,55  | 52,27  | 45,86  | 36,46  | 23,41  | 19,76  | 17,51  |
|         | 2.       | 1,13                      | 38,96  | 45,00  | 41,43  | 36,66  | 30,81  | 23,94  | 22,51  |
|         | 3.       | 2,79*                     | 5,54*  | 7,23*  | 7,96*  | 28,31* | 25,75* | 28,11* | 26,09* |
|         | Avg      | 0,76                      | 47,25  | 48,64  | 43,65  | 36,56  | 27,11  | 21,85  | 20,01  |
|         | SD       | 0,53                      | 11,73  | 5,15   | 3,13   | 0,14   | 5,23   | 2,96   | 3,54   |
| dU-4    | 1.       | 2,30                      | 59,88  | 73,14  | 45,12  | 35,82  | 23,04  | 28,12  | 11,23  |
|         | 2.       | 9,03                      | 37,70  | 48,11  | 44,30  | 36,75  | 17,24  | 18,52  | 19,92  |
|         | 3.       | 8,79                      | 35,02  | 35,29  | 36,10  | 4,65   | 1,89   | 2,08   | 2,58   |
|         | Avg      | 6,70                      | 44,20  | 52,18  | 41,84  | 25,74  | 14,06  | 16,24  | 11,24  |
|         | SD       | 3,82                      | 13,64  | 19,25  | 4,99   | 18,27  | 10,93  | 13,17  | 8,67   |
| dU+1    | 1.       | 0,00                      | 65,36  | 69,16  | 57,59  | 49,67  | 41,05  | 32,62  | 25,13  |
|         | 2.       | 3,09                      | 28,99  | 32,08  | 30,39  | 28,59  | 26,29  | 24,50  | 21,79  |
|         | 3.       | 3,97                      | 48,67  | 49,44  | 43,67  | 42,37  | 38,27  | 33,80  | 31,75  |
|         | Avg      | 2,35                      | 47,67  | 50,23  | 43,88  | 40,21  | 35,21  | 30,31  | 26,22  |
|         | SD       | 2,09                      | 18,21  | 18,55  | 13,60  | 10,71  | 7,84   | 5,06   | 5,07   |
| dU+4    | 1.       | 0,00                      | 0,60   | 14,59  | 25,28  | 14,46  | 25,96  | 26,59  | 23,41  |
|         | 2.       | 1,45                      | 3,23   | 15,89  | 18,97  | 24,29  | 21,44  | 21,05  | 21,56  |
|         | 3.       | 2,33                      | 2,71   | 7,98   | 25,23  | 26,23  | 23,15  | 19,33  | 18,53  |
|         | Avg      | 1,26                      | 2,18   | 12,82  | 23,16  | 21,66  | 23,52  | 22,32  | 21,17  |
|         | SD       | 1,18                      | 1,39   | 4,24   | 3,63   | 6,31   | 2,28   | 3,79   | 2,46   |

\* rejected values

| RcdA    |          | Time [min]              |       |       |       |       |       |       |       |
|---------|----------|-------------------------|-------|-------|-------|-------|-------|-------|-------|
|         |          | 0                       | 1     | 5     | 15    | 30    | 60    | 90    | 120   |
| Strand  | Data set | Polymerase activity [%] |       |       |       |       |       |       |       |
| dU0     | 1.       | 3,01                    | 9,72  | 8,05  | 7,93  | 7,71  | 6,57  | 4,16  | 3,62  |
|         | 2.       | 3,63                    | 7,06  | 4,79  | 4,76  | 5,63  | 5,13  | 3,98  | 4,50  |
|         | 3.       | 8,04                    | 5,45  | 7,27  | 3,74  | 4,92  | 3,68  | 3,28  | 2,61  |
|         | Avg      | 4,90                    | 7,41  | 6,70  | 5,48  | 6,09  | 5,13  | 3,81  | 3,58  |
|         | SD       | 2,74                    | 2,16  | 1,70  | 2,18  | 1,45  | 1,44  | 0,47  | 0,94  |
| dU-5    | 1.       | 1,30                    | 12,92 | 20,48 | 33,58 | 47,94 | 67,99 | 74,14 | 78,25 |
|         | 2.       | 4,01                    | 7,66  | 14,79 | 29,11 | 41,46 | 58,22 | 68,47 | 71,95 |
|         | 3.       | 9,34                    | 12,53 | 24,21 | 32,26 | 45,68 | 53,20 | 57,37 | 63,84 |
|         | Avg      | 4,88                    | 11,04 | 19,83 | 31,65 | 45,03 | 59,80 | 66,66 | 71,35 |
|         | SD       | 4,09                    | 2,93  | 4,74  | 2,29  | 3,29  | 7,52  | 8,53  | 7,22  |
| dU-5/+5 | 1.       | 0,93                    | 8,28  | 12,43 | 20,94 | 32,74 | 40,03 | 38,49 | 34,43 |
|         | 2.       | 1,41                    | 8,15  | 13,32 | 22,87 | 35,00 | 41,95 | 45,43 | 38,03 |
|         | 3.       | 5,42                    | 10,29 | 18,70 | 31,54 | 36,25 | 38,68 | 39,46 | 37,35 |
|         | Avg      | 2,59                    | 8,91  | 14,82 | 25,12 | 34,67 | 40,22 | 41,13 | 36,60 |
|         | SD       | 2,46                    | 1,20  | 3,40  | 5,65  | 1,78  | 1,64  | 3,76  | 1,91  |
| dU+5    | 1.       | 2,18                    | 2,84  | 3,96  | 14,84 | 23,51 | 31,18 | 43,89 | 57,15 |
|         | 2.       | 0,06                    | 0,00  | 0,00  | 16,05 | 19,06 | 30,34 | 32,80 | 34,03 |
|         | 3.       | 5,66                    | 5,21  | 7,54  | 20,15 | 32,45 | 36,36 | 37,66 | 42,37 |
|         | Avg      | 2,63                    | 2,68  | 3,83  | 17,01 | 25,01 | 32,63 | 38,12 | 44,51 |
|         | SD       | 2,83                    | 2,61  | 3,77  | 2,78  | 6,82  | 3,26  | 5,56  | 11,71 |
| dU-1    | 1.       | 2,12                    | 13,14 | 21,67 | 27,42 | 31,86 | 34,62 | 35,80 | 35,47 |
|         | 2.       | 5,33                    | 10,07 | 20,20 | 27,47 | 25,87 | 29,42 | 25,67 | 27,55 |
|         | 3.       | 0,02*                   | 0,00* | 0,00* | 0,00* | 5,37* | 4,52* | 5,24* | 3,06* |
|         | Avg      | 3,72                    | 11,61 | 20,94 | 27,45 | 28,87 | 32,02 | 30,74 | 31,51 |
|         | SD       | 2,27                    | 2,17  | 1,04  | 0,03  | 4,23  | 3,68  | 7,16  | 5,60  |
| dU-4    | 1.       | 8,01                    | 11,91 | 17,45 | 51,61 | 61,44 | 74,80 | 70,50 | 62,23 |
|         | 2.       | 0,08                    | 17,21 | 32,67 | 40,24 | 49,60 | 76,35 | 69,52 | 66,68 |
|         | 3.       | 7,07                    | 21,82 | 25,21 | 28,07 | 15,40 | 8,62  | 15,92 | 13,05 |
|         | Avg      | 5,05                    | 16,98 | 25,11 | 39,97 | 42,15 | 53,26 | 51,98 | 47,32 |
|         | SD       | 4,33                    | 4,96  | 7,61  | 11,77 | 23,91 | 38,67 | 31,23 | 29,76 |
| dU+1    | 1.       | 2,32                    | 6,17  | 8,17  | 6,06  | 4,91  | 2,88  | 0,92  | 0,60  |
|         | 2.       | 5,73                    | 6,68  | 8,02  | 6,73  | 6,55  | 5,28  | 6,36  | 2,95  |
|         | 3.       | 1,15                    | 0,43  | 12,75 | 10,25 | 8,38  | 5,33  | 4,40  | 4,61  |
|         | Avg      | 3,07                    | 4,43  | 9,64  | 7,68  | 6,61  | 4,50  | 3,89  | 2,72  |
|         | SD       | 2,38                    | 3,47  | 2,69  | 2,25  | 1,73  | 1,40  | 2,75  | 2,01  |
| dU+4    | 1.       | 7,28                    | 7,11  | 9,19  | 11,96 | 15,64 | 21,38 | 25,08 | 28,28 |
|         | 2.       | 8,43                    | 8,76  | 11,39 | 11,32 | 11,73 | 14,36 | 13,51 | 13,14 |
|         | 3.       | 9,06                    | 10,25 | 13,88 | 18,66 | 26,60 | 31,64 | 39,91 | 33,59 |
|         | Avg      | 8,26                    | 8,71  | 11,49 | 13,98 | 17,99 | 22,46 | 26,16 | 25,00 |
|         | SD       | 0,90                    | 1,57  | 2,34  | 4,07  | 7,71  | 8,69  | 13,23 | 10,62 |

\* rejected values

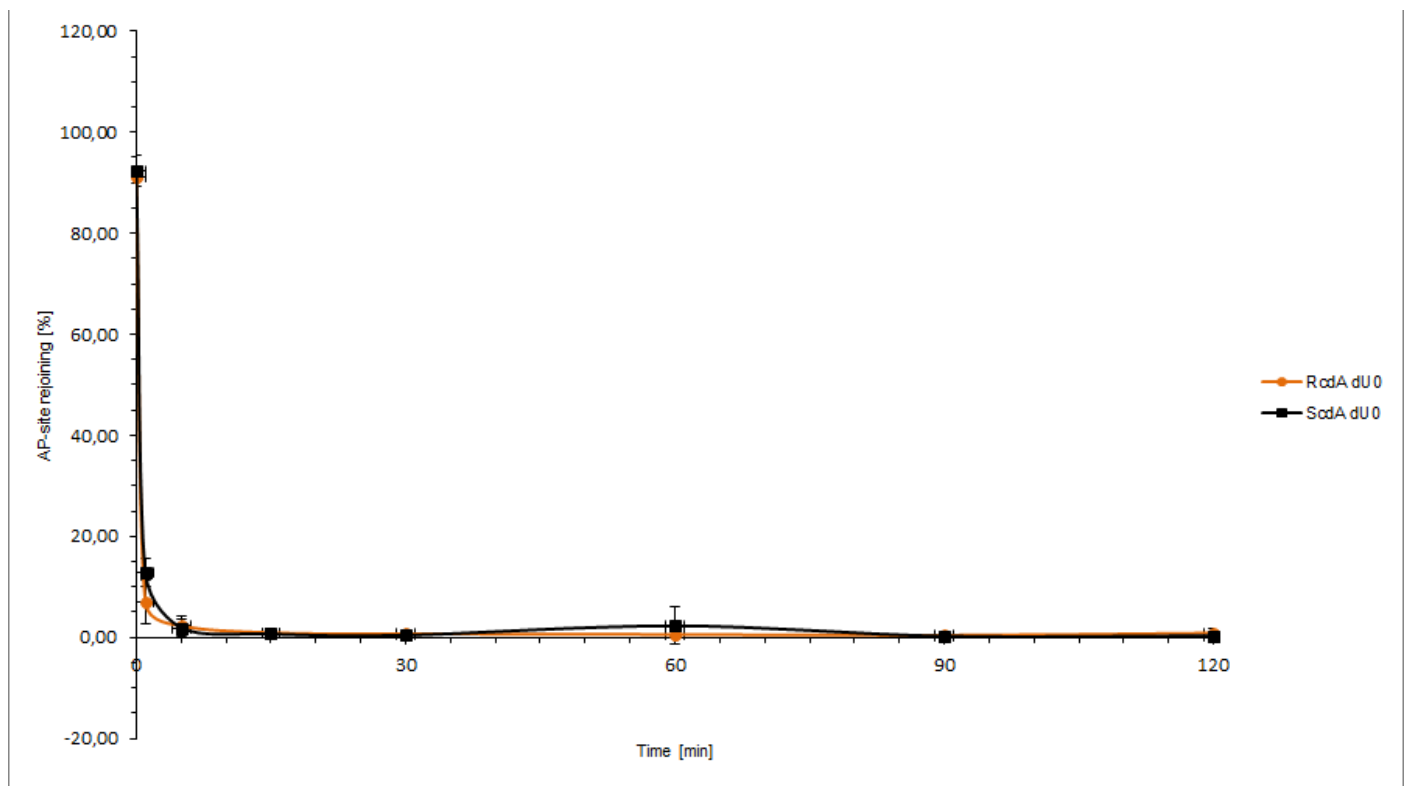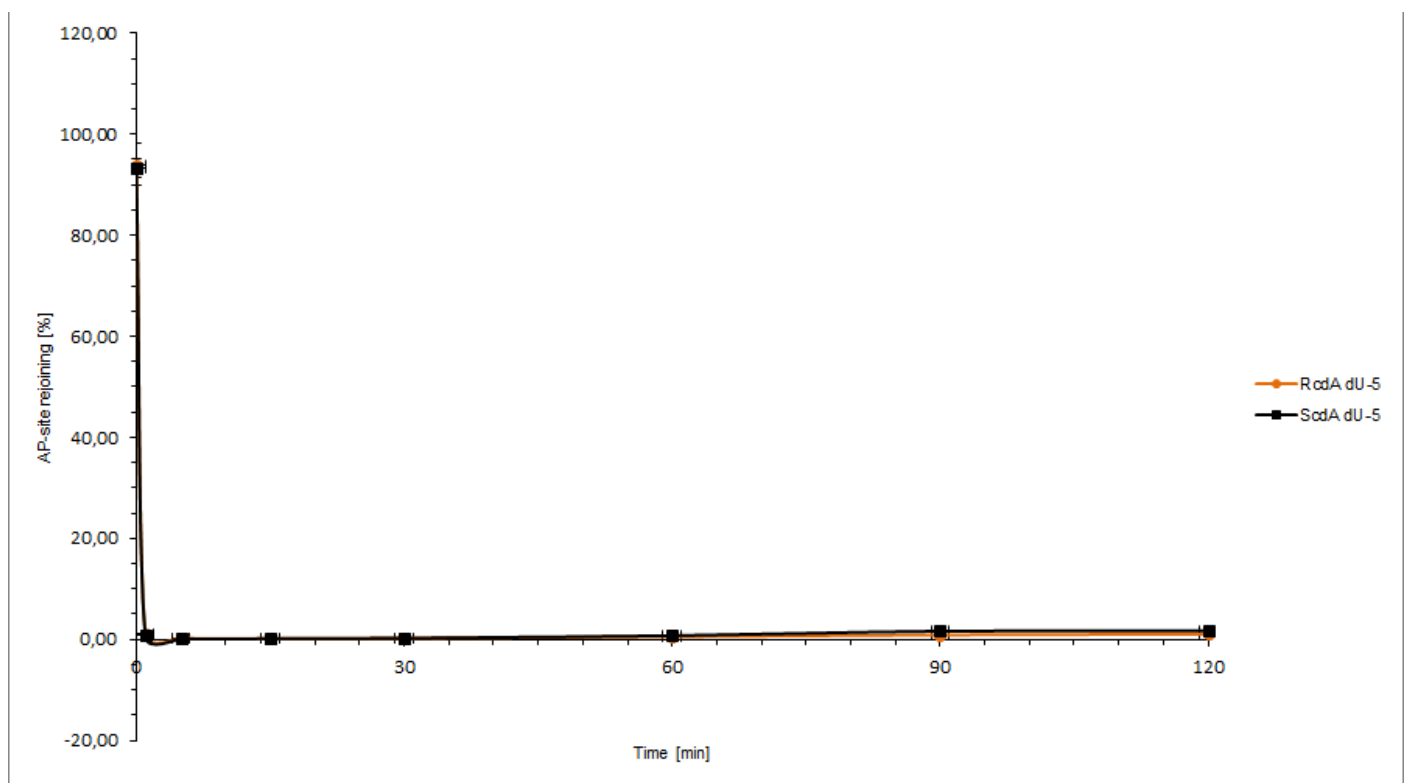

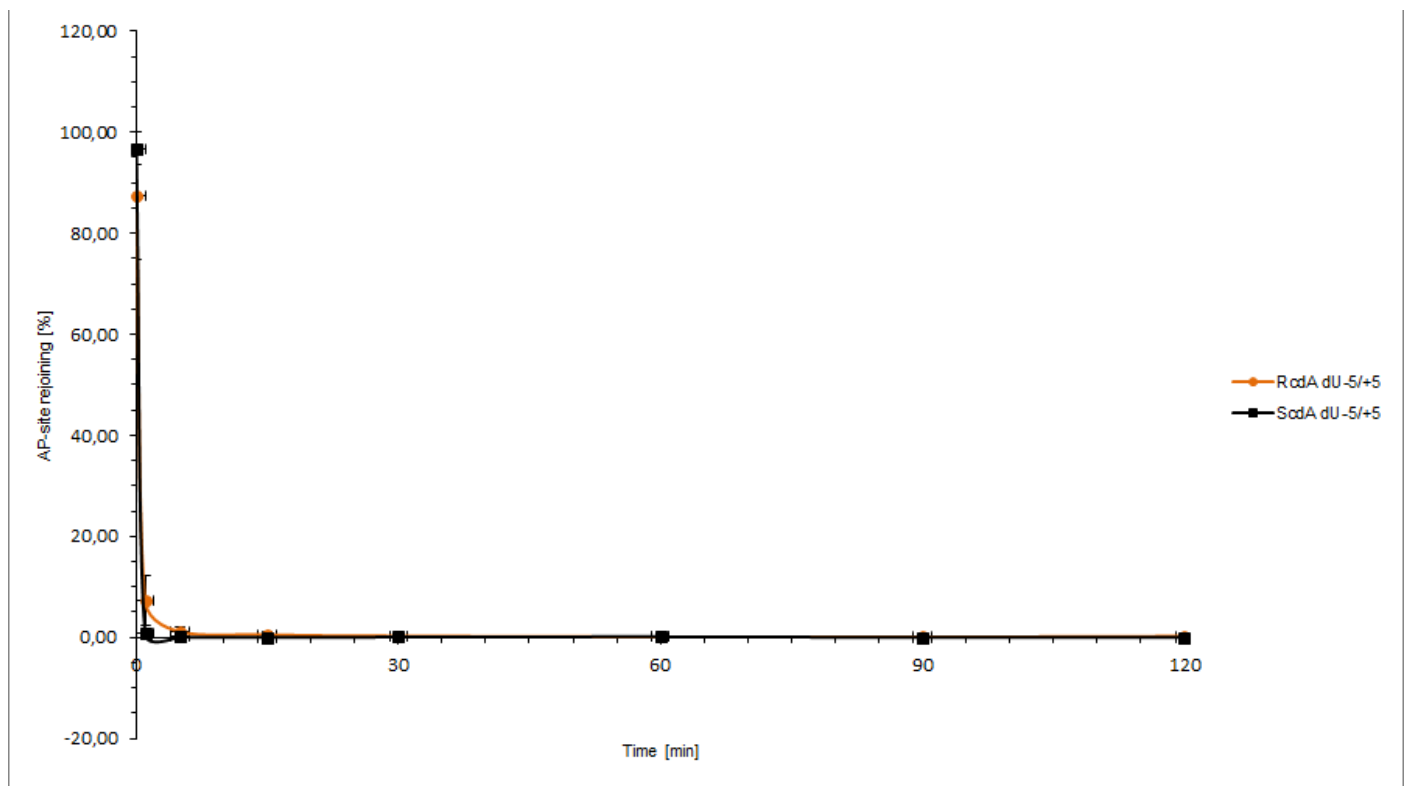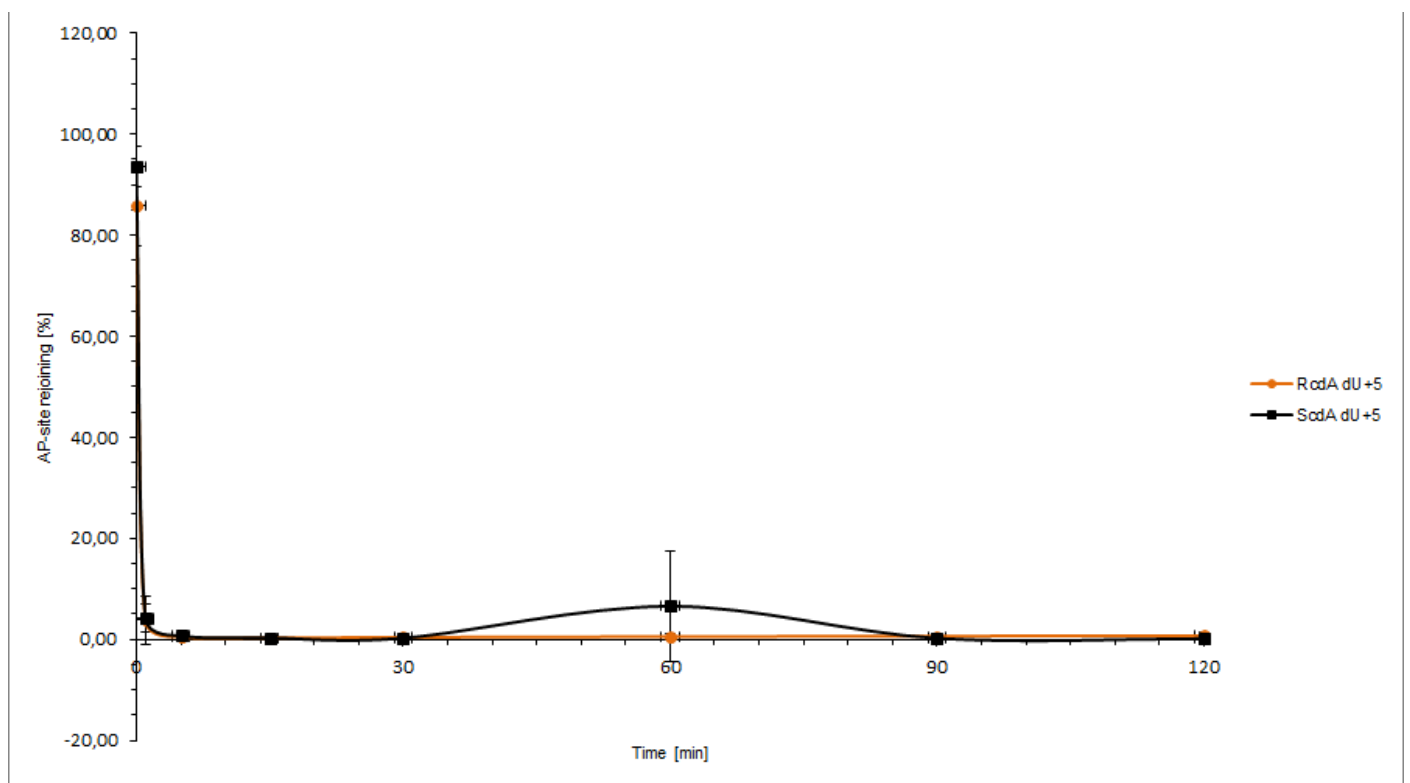

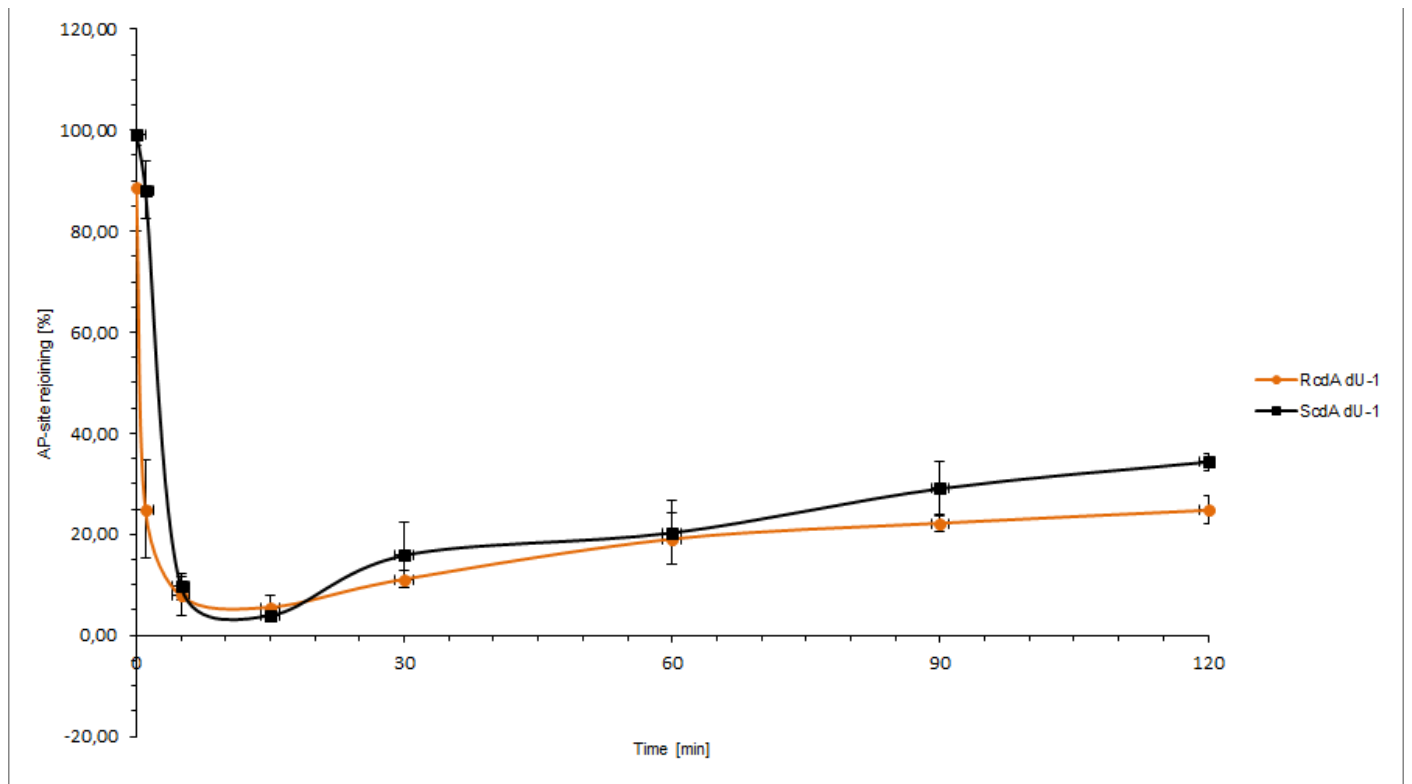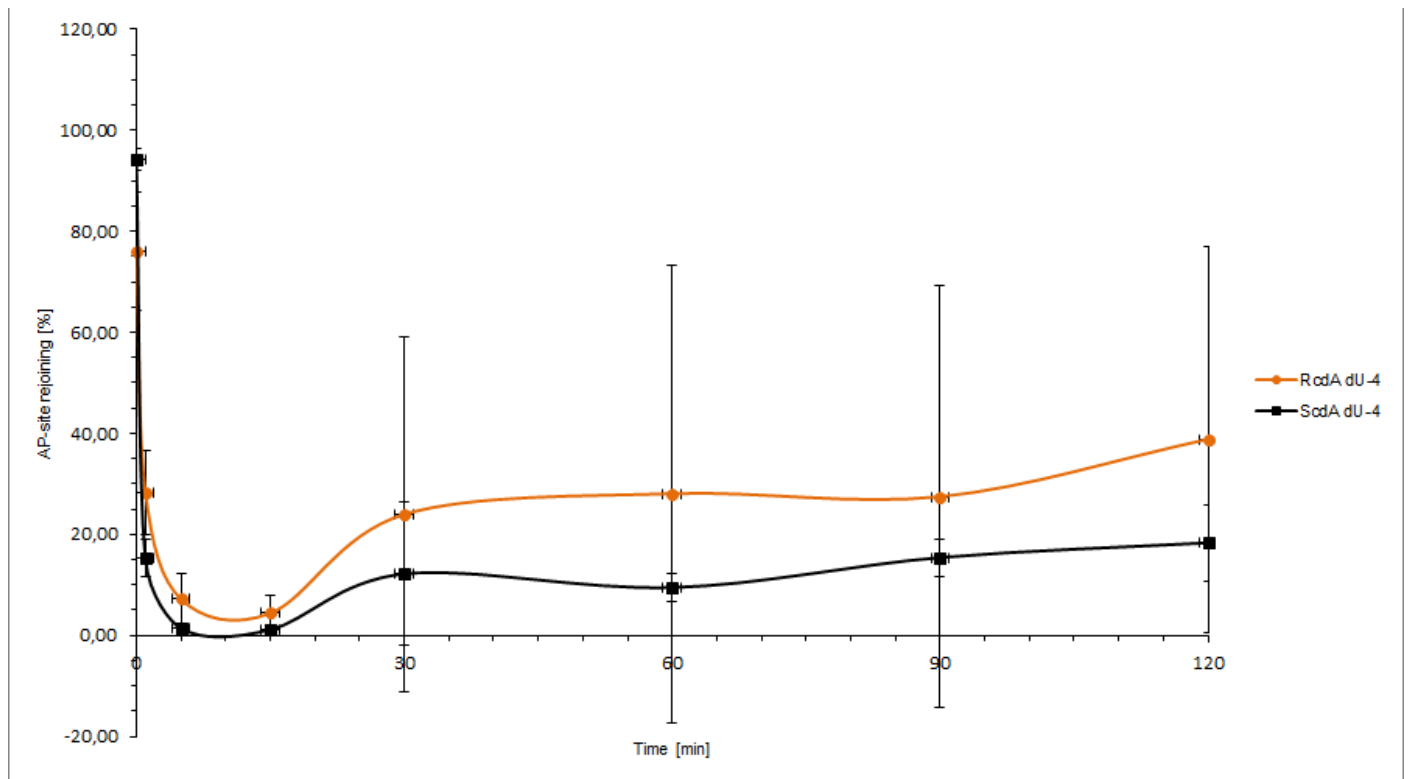

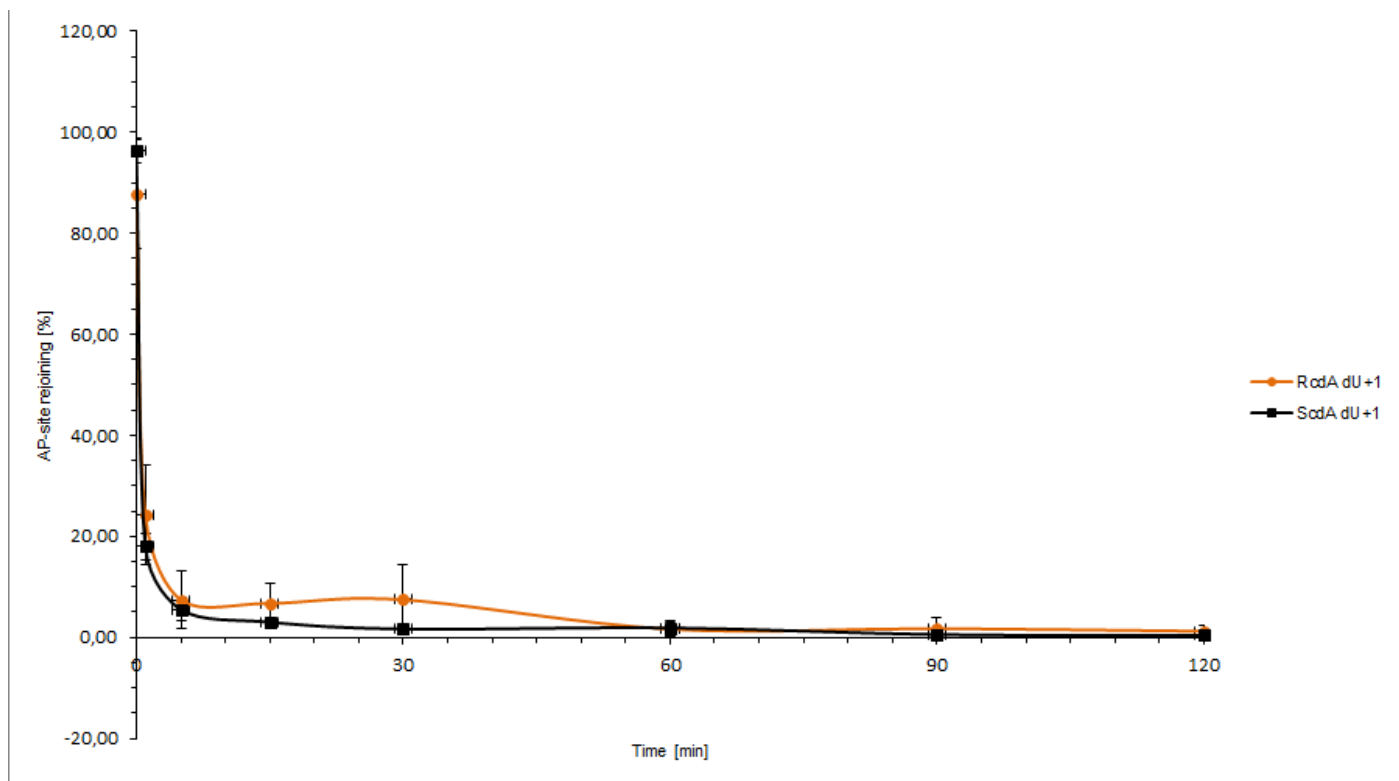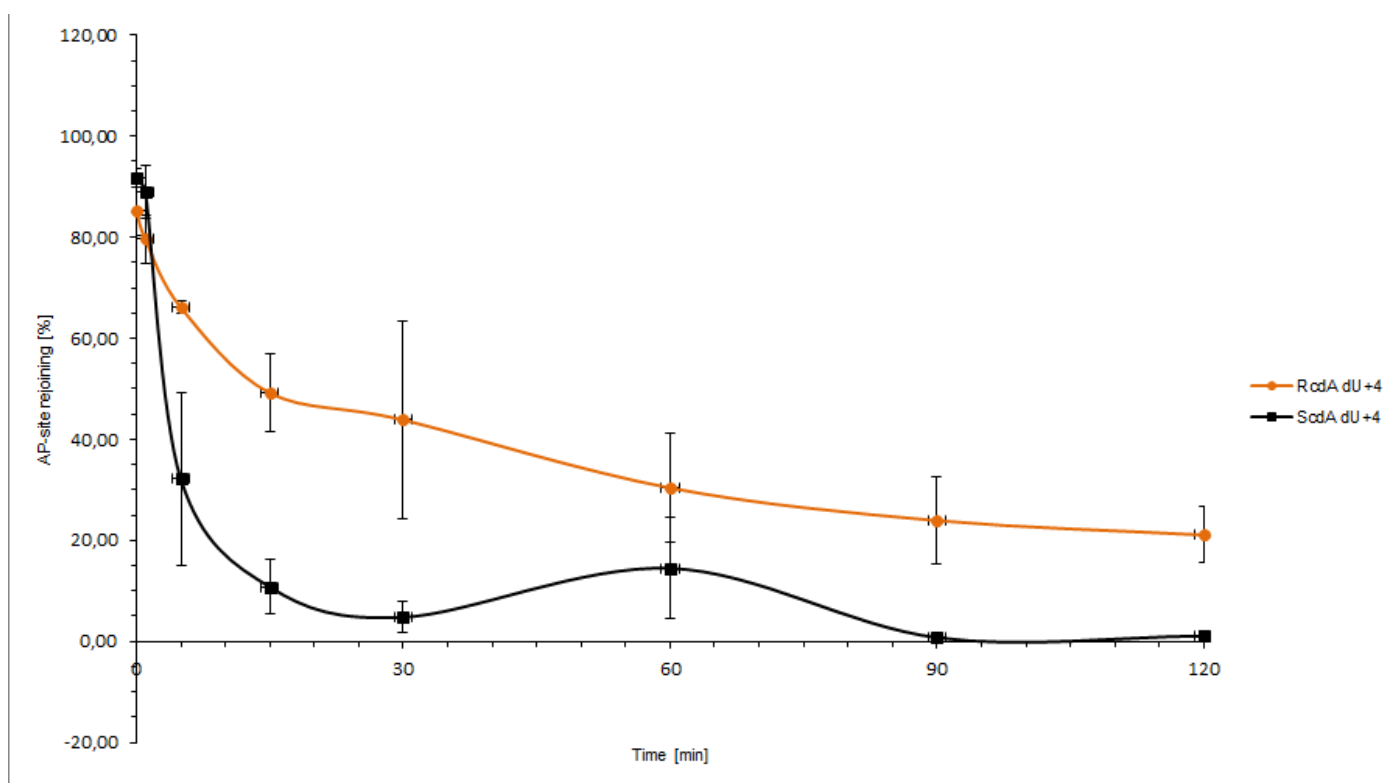

**Figure S7.** AP site rejoining [%] of ScdA vs. RcdA – comparison of individual strands – XPC Nuclear Extract.

A.

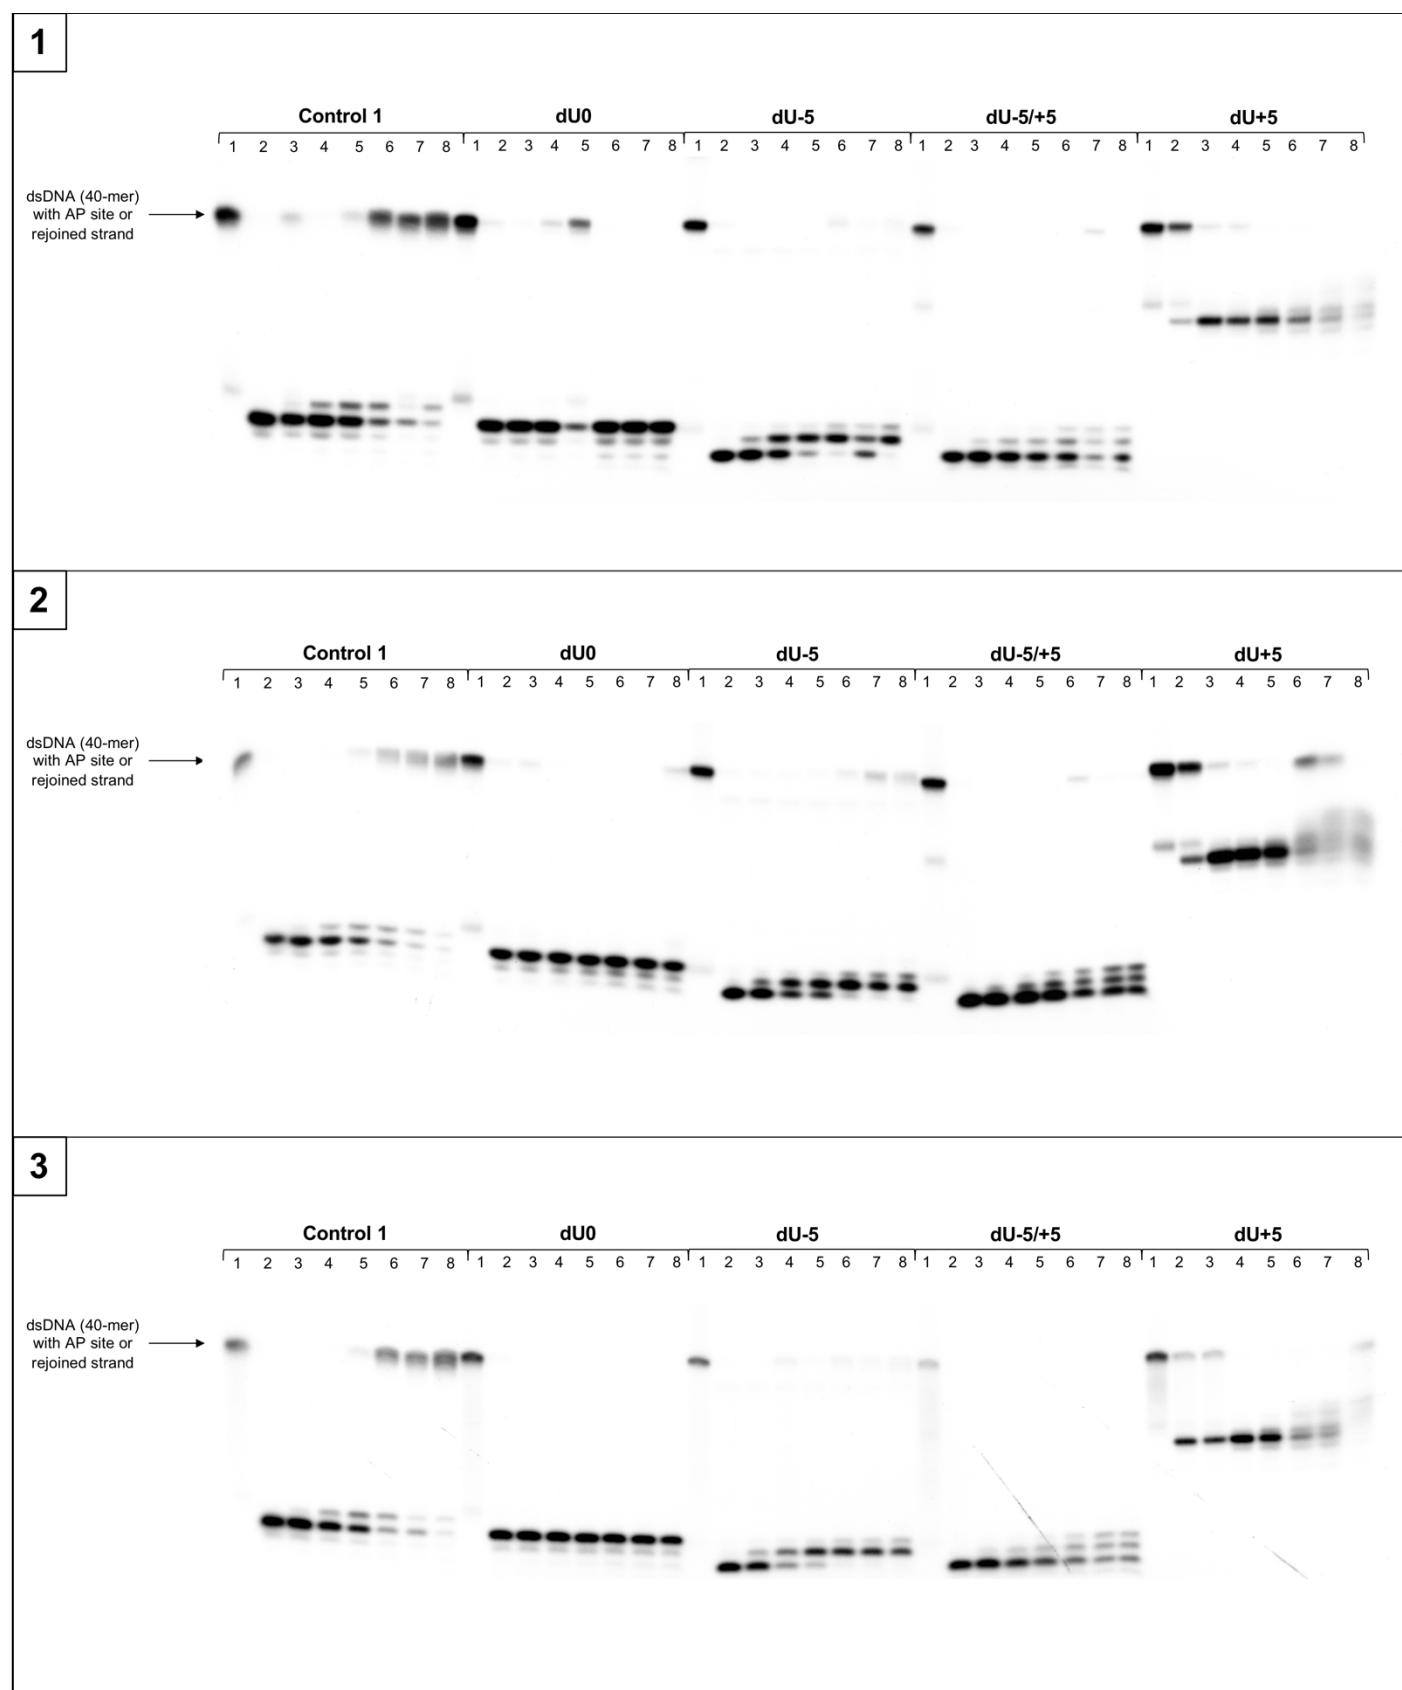



B.

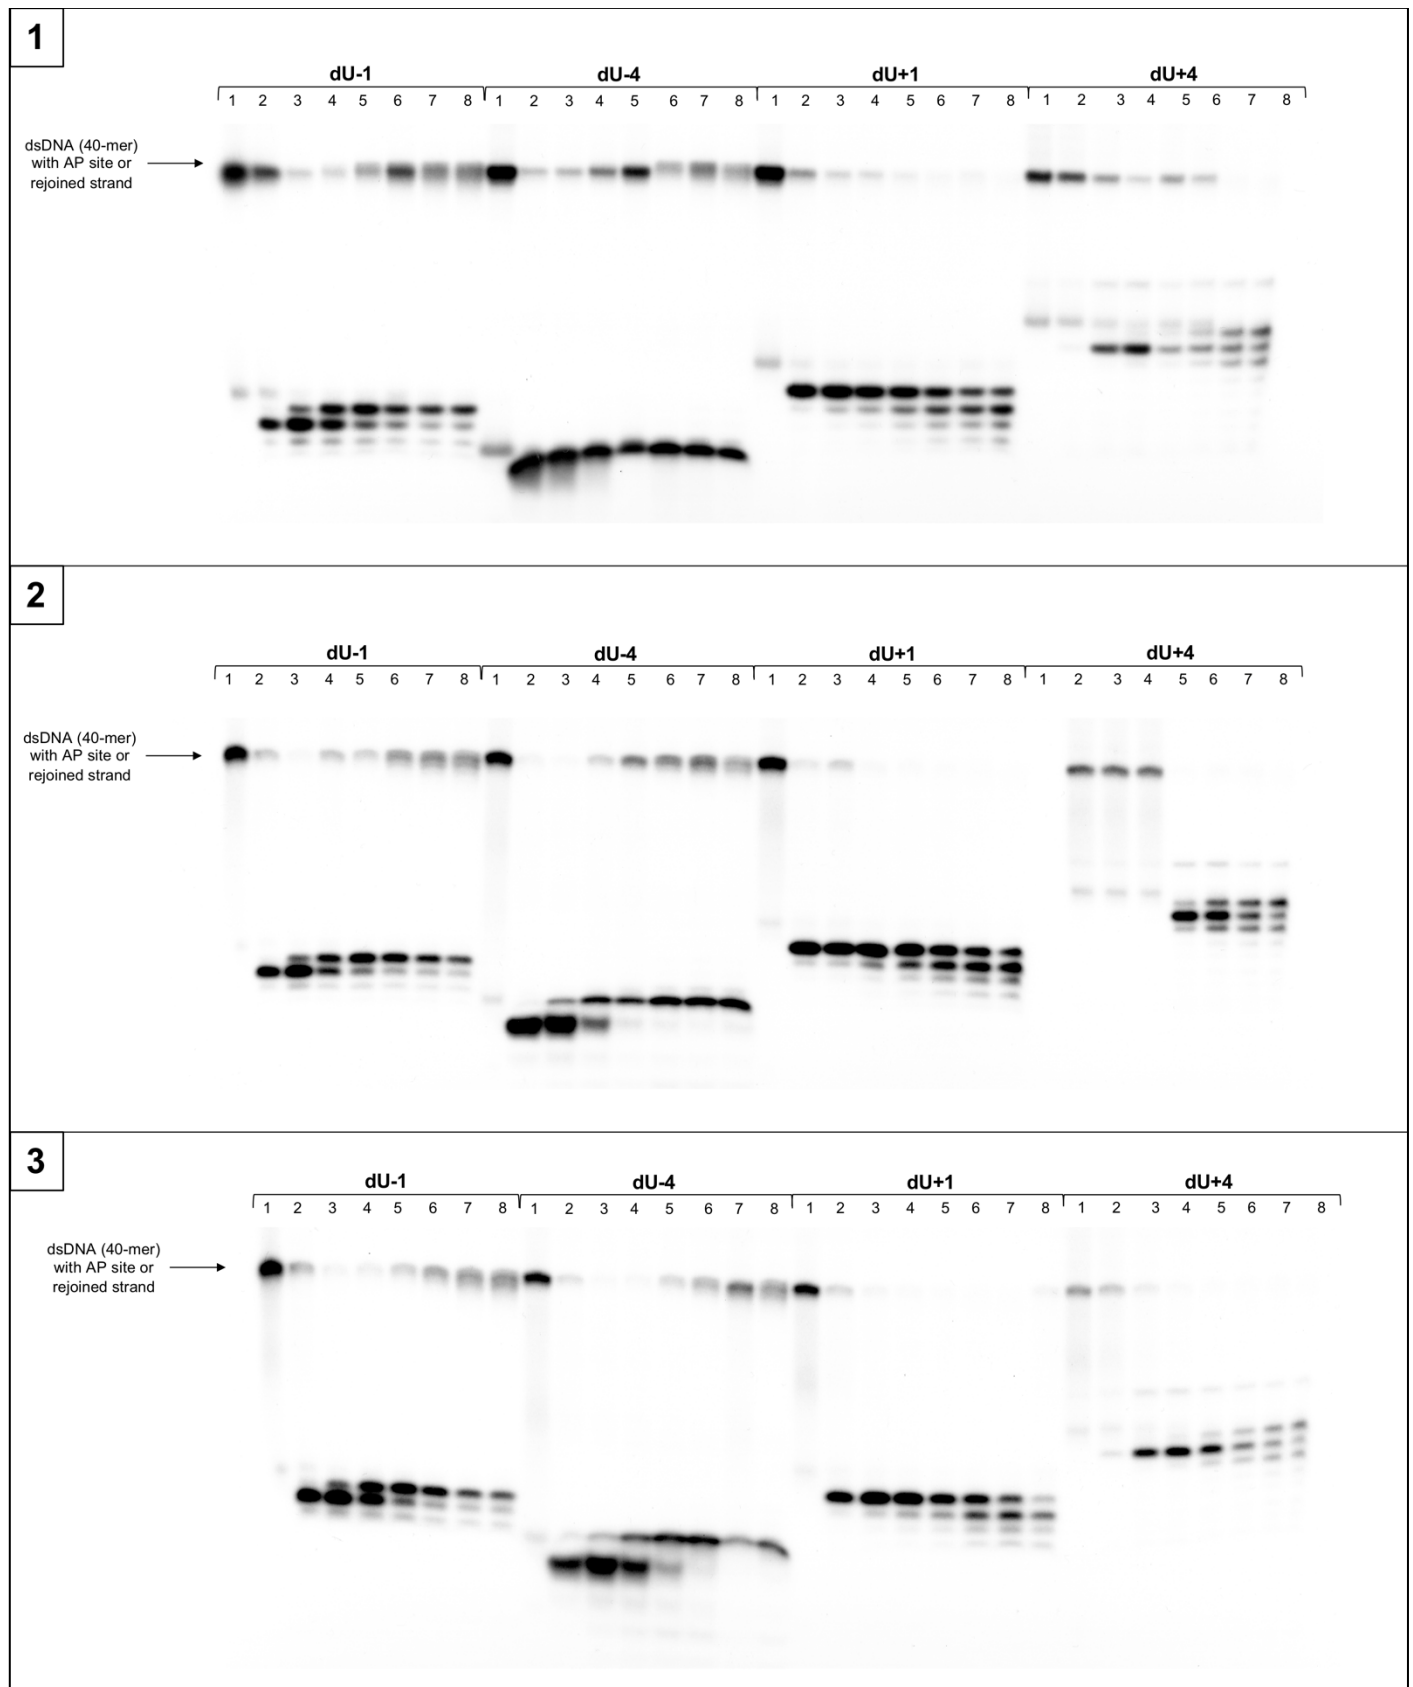

**Figure S8.** The autoradiograms presenting repair of (A) ss-CDL and (B) ds-CDL containing **ScdA** – BJ Nuclear Extract. Lanes correspond with different assay time: lane 1 - 0 min; lane 2 - 1 min; lane 3 - 5 min; lane 4 - 15 min; lane 5 - 30 min; lane 6 - 60 min; lane 7 - 90 min; lane 8 - 120 min. Three replications of the experiment are shown.

A.

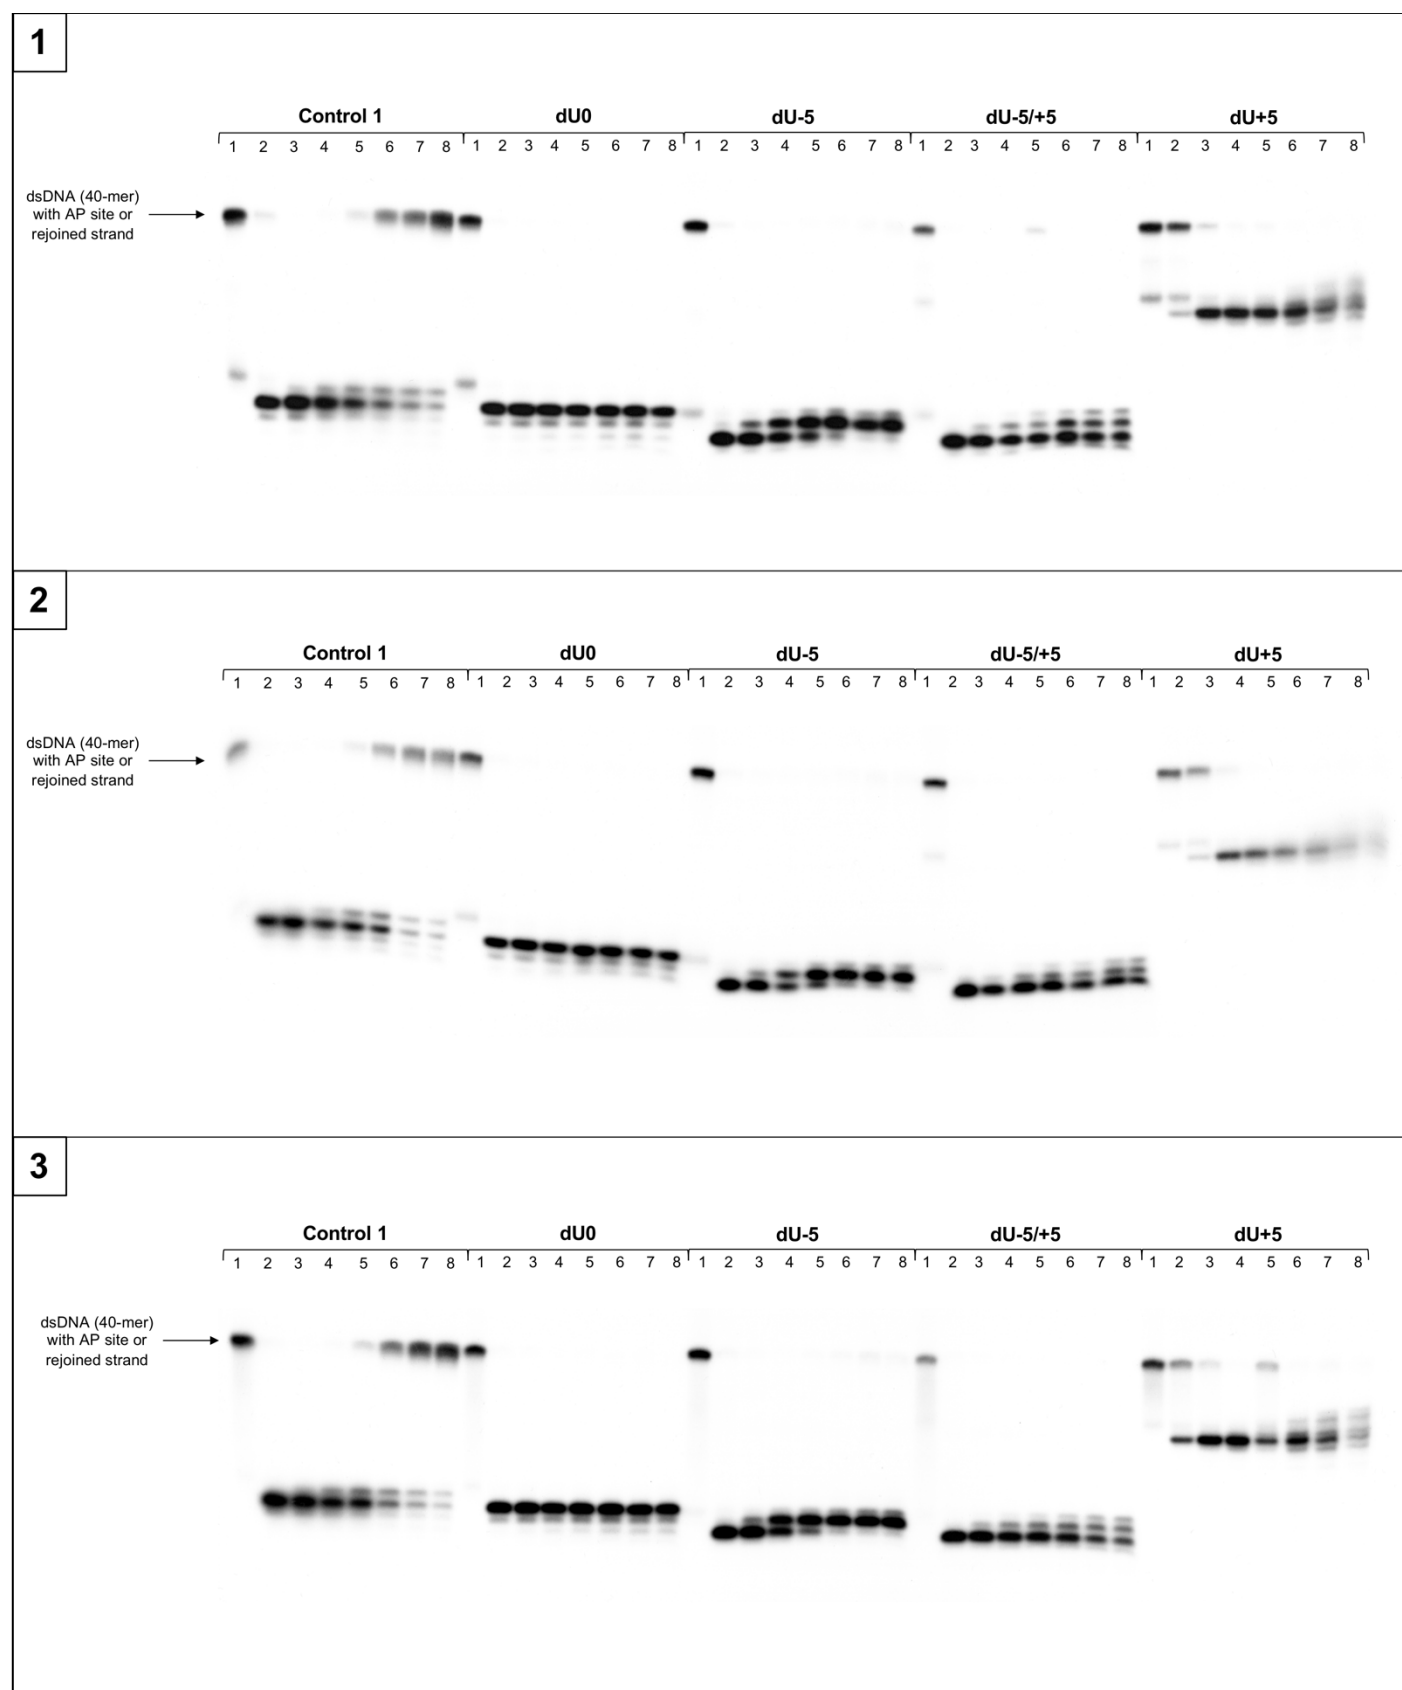

B.

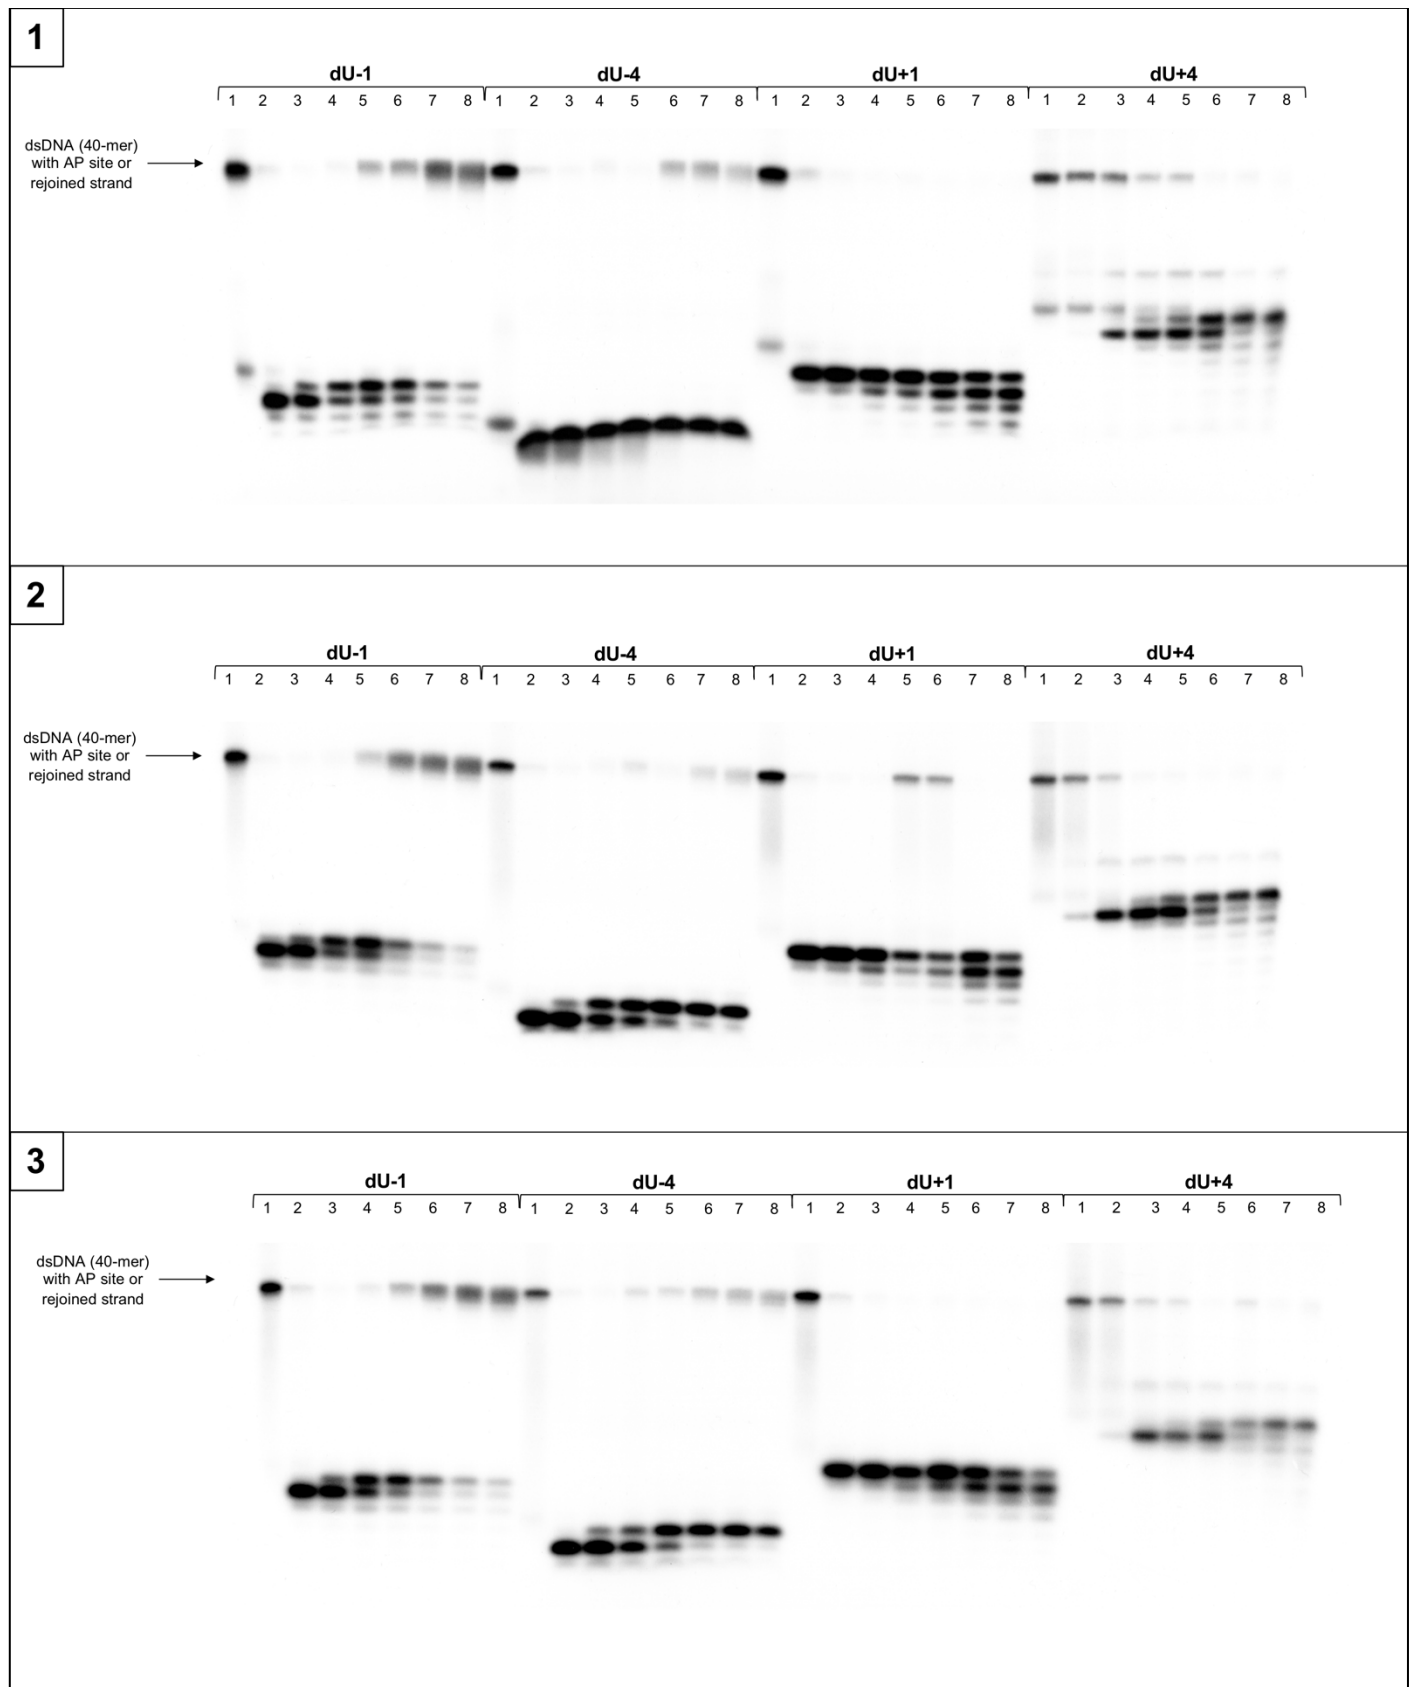

**Figure S9.** The autoradiograms presenting repair of (A) ss-CDL and (B) ds-CDL containing **RcdA** – BJ Nuclear Extract. Lanes correspond with different assay time: lane 1 - 0 min; lane 2 - 1 min; lane 3 - 5 min; lane 4 - 15 min; lane 5 - 30 min; lane 6 - 60 min; lane 7 - 90 min; lane 8 - 120 min. Three replications of the experiment are shown.

A.

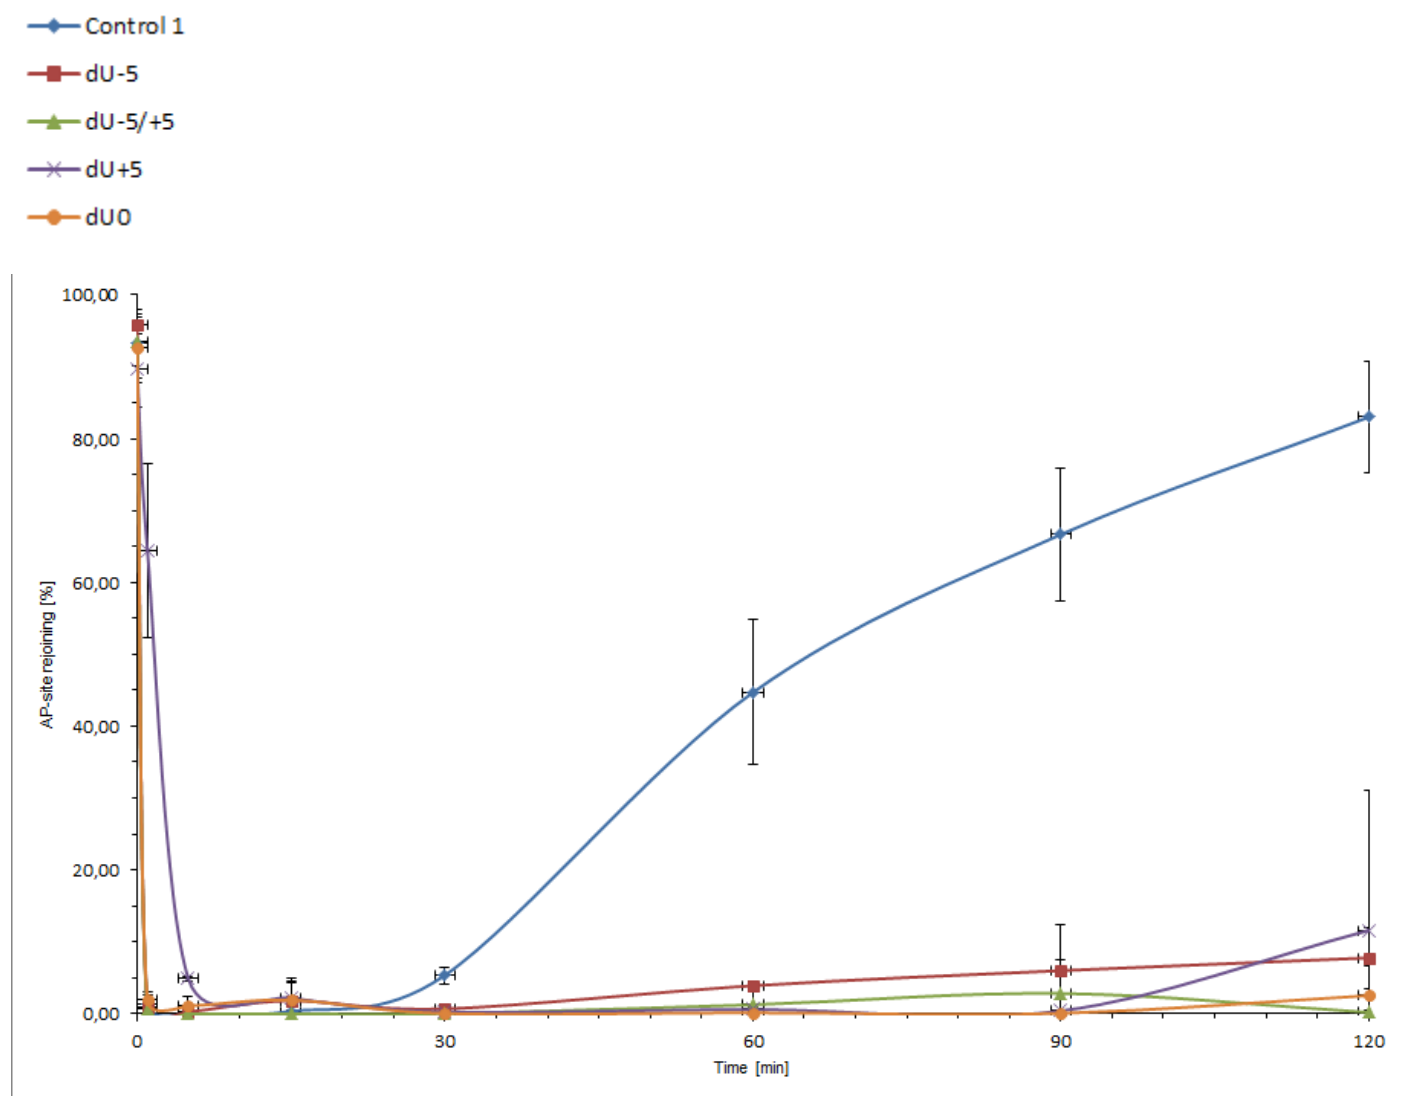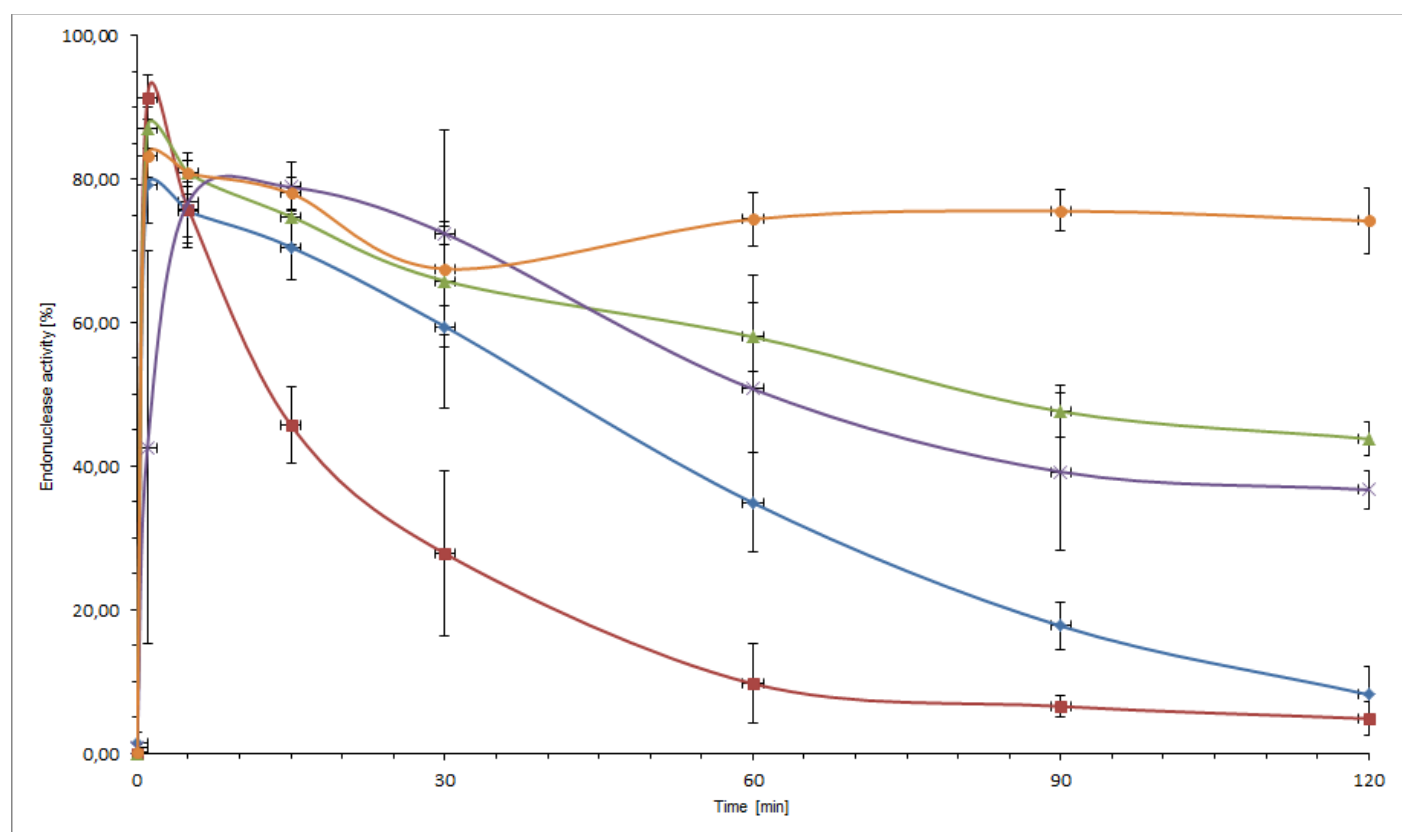

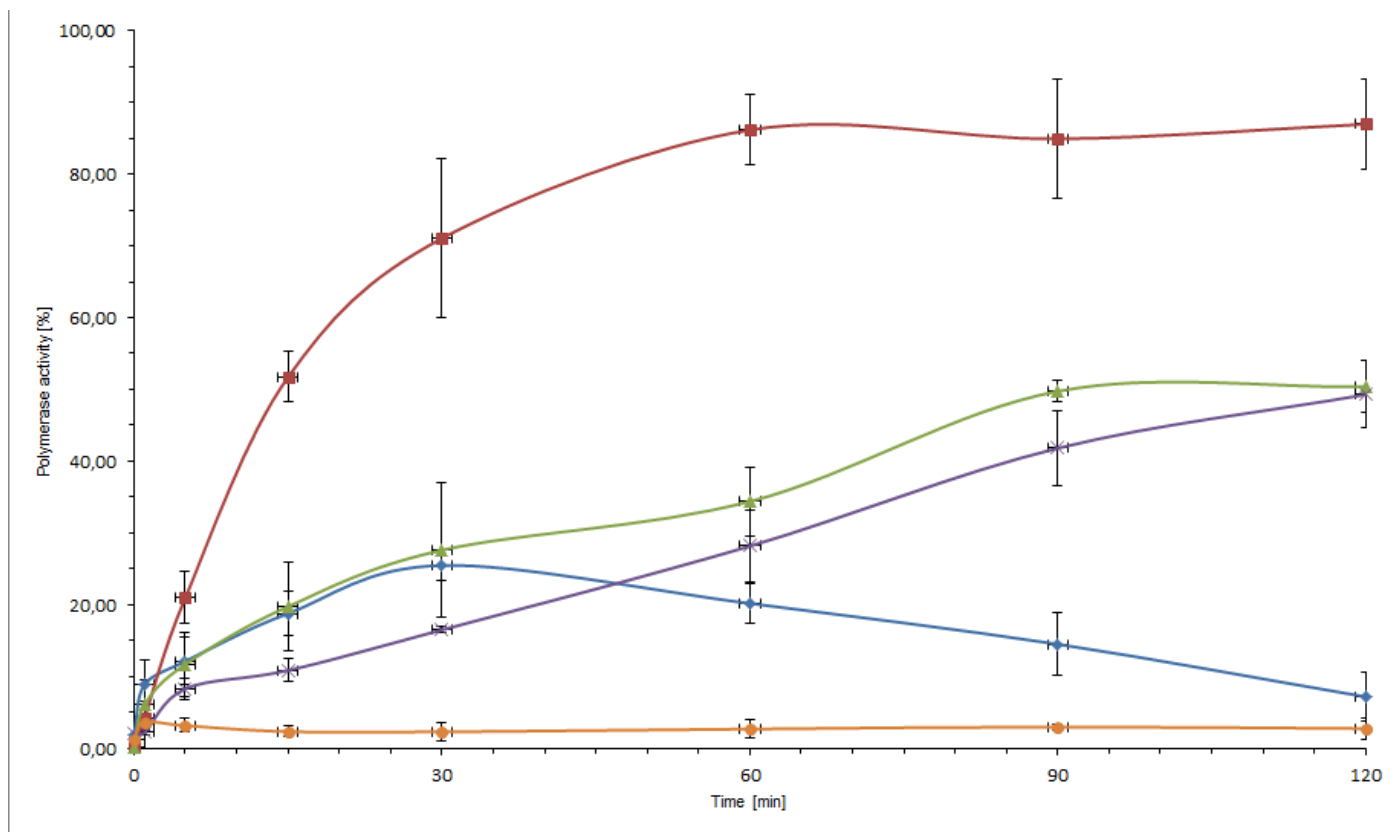

B.

- Control 1
- dU-1
- dU 0
- dU +1
- dU +4
- dU -4

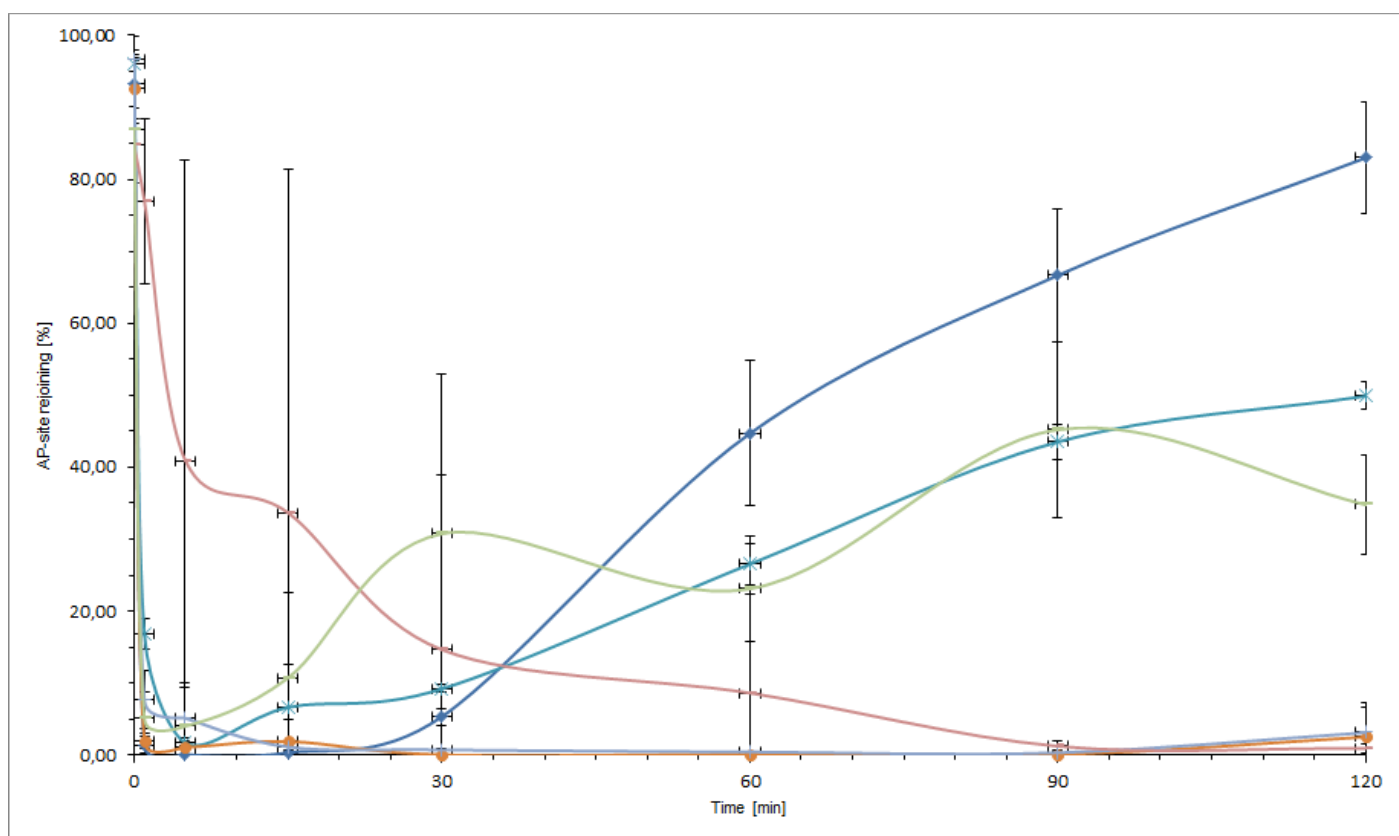

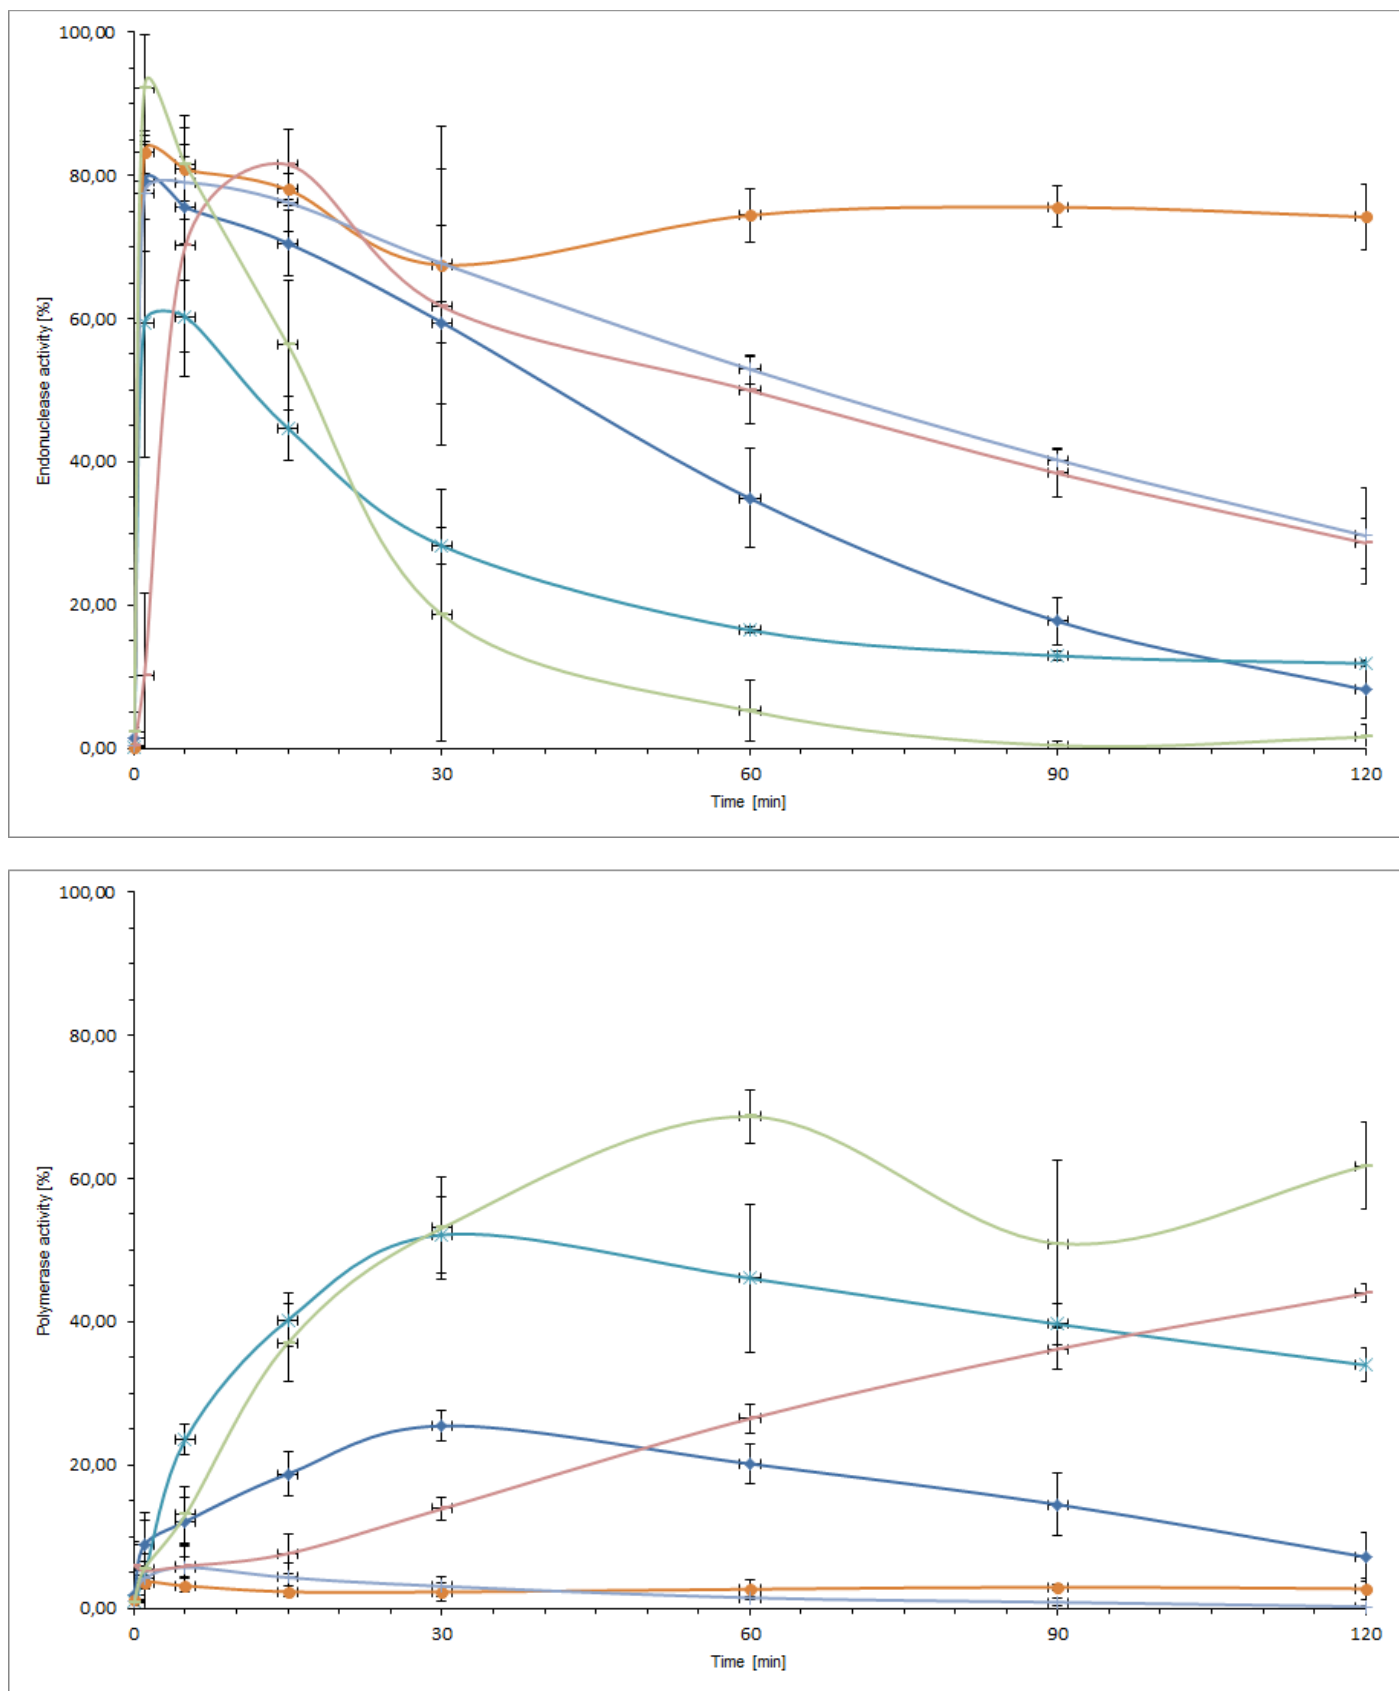

**Figure S10.** Graphical representation of DNA repair assays' results for ScdA – BJ Nuclear Extract. **(A)** ss-CDL, **(B)** ds-CDL

**Table S4.** Raw numerical data – Control 1 – BJ Nuclear Extract. \* rejected values

|           |          | Time [min]            |      |       |      |      |        |       |       |
|-----------|----------|-----------------------|------|-------|------|------|--------|-------|-------|
|           |          | 0                     | 1    | 5     | 15   | 30   | 60     | 90    | 120   |
| Strand    | Data set | AP site rejoining [%] |      |       |      |      |        |       |       |
| Control 1 | 1.       | 93,83                 | 0,87 | 9,73* | 0,55 | 6,20 | 52,04  | 73,82 | 79,86 |
|           | 2.       | 95,42                 | 0,70 | 0,06  | 0,28 | 6,11 | 37,93  | 66,81 | 90,54 |
|           | 3.       | 97,67                 | 0,23 | 0,05  | 0,15 | 4,78 | 57,57  | 72,02 | 91,79 |
|           | 4.       | 85,07                 | 3,42 | 0,05  | 0,33 | 4,59 | 32,76  | 49,07 | 74,22 |
|           | 5.       | 90,50                 | 2,16 | 0,17  | 0,27 | 3,74 | 23,88* | 66,10 | 75,09 |
|           | 6.       | 96,71                 | 1,03 | 0,14  | 0,65 | 6,77 | 43,21  | 72,09 | 86,36 |
|           | Avg      | 93,20                 | 1,40 | 0,09  | 0,37 | 5,37 | 44,70  | 66,65 | 82,98 |
|           | SD       | 4,71                  | 1,18 | 0,06  | 0,19 | 1,17 | 10,13  | 9,16  | 7,68  |

|           |          | Time [min]                |        |        |        |       |        |        |       |
|-----------|----------|---------------------------|--------|--------|--------|-------|--------|--------|-------|
|           |          | 0                         | 1      | 5      | 15     | 30    | 60     | 90     | 120   |
| Strand    | Data set | Endonuclease activity [%] |        |        |        |       |        |        |       |
| Control 1 | 1.       | 0,23                      | 80,03  | 74,09  | 67,73  | 58,27 | 25,92  | 20,45  | 8,17  |
|           | 2.       | 1,27                      | 80,28  | 78,76  | 74,25  | 61,83 | 32,64  | 14,02  | 4,09  |
|           | 3.       | 0,93                      | 83,90  | 81,89  | 76,37  | 61,45 | 21,84* | 21,61  | 4,06  |
|           | 4.       | 0,51                      | 80,97  | 74,28  | 68,57  | 61,48 | 39,63  | 27,69* | 13,27 |
|           | 5.       | 4,01                      | 70,23  | 68,65  | 65,76  | 59,42 | 43,68  | 17,60  | 12,13 |
|           | 6.       | 1,70                      | 65,43* | 61,13* | 58,62* | 54,26 | 32,60  | 14,89  | 7,20  |
|           | Avg      | 1,44                      | 79,08  | 75,54  | 70,53  | 59,45 | 34,90  | 17,72  | 8,15  |
|           | SD       | 1,36                      | 5,18   | 5,05   | 4,54   | 2,90  | 6,90   | 3,33   | 3,90  |

|           |          | Time [min]              |       |       |       |       |       |       |       |
|-----------|----------|-------------------------|-------|-------|-------|-------|-------|-------|-------|
|           |          | 0                       | 1     | 5     | 15    | 30    | 60    | 90    | 120   |
| Strand    | Data set | Polymerase activity [%] |       |       |       |       |       |       |       |
| Control 1 | 1.       | 1,50                    | 4,93* | 6,07* | 16,77 | 26,85 | 18,67 | 5,01* | 10,94 |
|           | 2.       | 2,11                    | 9,12  | 10,77 | 16,53 | 24,13 | 24,03 | 16,10 | 4,00  |
|           | 3.       | 0,83                    | 5,16  | 8,02  | 15,38 | 28,51 | 18,25 | 4,94* | 3,74  |
|           | 4.       | 1,79                    | 5,74  | 10,81 | 19,83 | 23,87 | 20,91 | 19,75 | 10,52 |
|           | 5.       | 4,22                    | 10,23 | 15,68 | 23,15 | 26,58 | 22,57 | 12,07 | 8,93  |
|           | 6.       | 0,69                    | 13,82 | 15,29 | 20,90 | 22,93 | 16,64 | 10,02 | 4,81  |
|           | Avg      | 1,86                    | 8,81  | 12,11 | 18,76 | 25,48 | 20,18 | 14,48 | 7,16  |
|           | SD       | 1,28                    | 3,53  | 3,28  | 3,01  | 2,15  | 2,81  | 4,32  | 3,34  |

**Table S5.** Raw numerical data – ScdA – BJ Nuclear Extract.

| ScdA    |          | Time [min]            |        |        |       |        |        |        |        |
|---------|----------|-----------------------|--------|--------|-------|--------|--------|--------|--------|
|         |          | 0                     | 1      | 5      | 15    | 30     | 60     | 90     | 120    |
| Strand  | Data set | AP site rejoining [%] |        |        |       |        |        |        |        |
| dU0     | 1.       | 88,26                 | 2,96   | 0,60   | 5,53  | 50,05* | 0,26   | 0,08   | 0,09   |
|         | 2.       | 91,72                 | 1,89   | 2,67   | 0,15  | 0,07   | 0,11   | 0,08   | 7,40   |
|         | 3.       | 97,67                 | 0,95   | 0,13   | 0,07  | 0,05   | 0,05   | 0,07   | 0,15   |
|         | Avg      | 92,55                 | 1,93   | 1,13   | 1,92  | 0,06   | 0,14   | 0,08   | 2,55   |
|         | SD       | 4,76                  | 1,01   | 1,35   | 3,13  | 0,02   | 0,10   | 0,01   | 4,20   |
| dU-5    | 1.       | 95,18                 | 1,14   | 0,08   | 0,05  | 0,15   | 3,89   | 1,20   | 3,86   |
|         | 2.       | 94,84                 | 0,81   | 0,58   | 0,61  | 0,69   | 3,30   | 13,19  | 12,27  |
|         | 3.       | 97,16                 | 0,54   | 0,33   | 4,78  | 1,27   | 4,53   | 3,62   | 7,22   |
|         | Avg      | 95,72                 | 0,83   | 0,33   | 1,81  | 0,70   | 3,91   | 6,00   | 7,78   |
|         | SD       | 1,25                  | 0,30   | 0,25   | 2,58  | 0,56   | 0,61   | 6,34   | 4,23   |
| dU-5/+5 | 1.       | 93,97                 | 1,34   | 0,02   | 0,01  | 0,02   | 0,07   | 8,16   | 0,02   |
|         | 2.       | 92,13                 | 0,47   | 0,03   | 0,02  | 0,05   | 3,70   | 0,30   | 0,39   |
|         | 3.       | 94,24                 | 0,17   | 0,00   | 0,02  | 0,07   | 0,04   | 0,06   | 0,21   |
|         | Avg      | 93,44                 | 0,66   | 0,02   | 0,02  | 0,04   | 1,27   | 2,84   | 0,20   |
|         | SD       | 1,15                  | 0,61   | 0,01   | 0,00  | 0,03   | 2,10   | 4,61   | 0,18   |
| dU+5    | 1.       | 91,16                 | 72,97  | 4,68   | 4,60  | 0,23   | 0,40   | 0,29   | 0,32   |
|         | 2.       | 83,71                 | 55,86  | 5,06   | 1,81  | 0,39   | 28,91* | 18,35* | 0,51   |
|         | 3.       | 94,07                 | 19,43* | 18,35* | 0,20  | 0,18   | 0,81   | 0,54   | 34,00* |
|         | Avg      | 89,65                 | 64,42  | 4,87   | 2,20  | 0,27   | 0,61   | 0,41   | 11,61  |
|         | SD       | 5,34                  | 12,10  | 0,27   | 2,23  | 0,11   | 0,29   | 0,18   | 19,39  |
| dU-1    | 1.       | 91,59                 | 49,93* | 7,14*  | 6,49* | 18,98* | 45,60* | 45,54  | 47,86  |
|         | 2.       | 98,97                 | 15,36  | 1,46   | 10,89 | 9,59   | 28,61  | 40,85  | 50,21  |
|         | 3.       | 97,29                 | 18,35  | 1,94   | 2,43  | 8,86   | 24,49  | 44,15  | 51,59  |
|         | Avg      | 95,95                 | 16,85  | 1,70   | 6,66  | 9,22   | 26,55  | 43,52  | 49,88  |
|         | SD       | 3,87                  | 2,12   | 0,34   | 5,98  | 0,52   | 2,91   | 2,41   | 1,89   |
| dU-4    | 1.       | 75,74                 | 9,06   | 11,00  | 23,93 | 49,05  | 21,68  | 37,05  | 33,89  |
|         | 2.       | 94,89                 | 1,91   | 0,53   | 7,42  | 37,02  | 31,05  | 39,40  | 28,37  |
|         | 3.       | 89,85                 | 4,20   | 0,55   | 0,88  | 6,24   | 16,63  | 59,20  | 42,11  |
|         | Avg      | 86,83                 | 5,06   | 4,03   | 10,74 | 30,77  | 23,12  | 45,22  | 34,79  |
|         | SD       | 9,93                  | 3,65   | 6,04   | 11,88 | 22,08  | 7,32   | 12,17  | 6,91   |
| dU+1    | 1.       | 88,71*                | 21,63* | 7,38*  | 6,25* | 3,24*  | 1,92*  | 2,95*  | 1,55*  |
|         | 2.       | 96,53                 | 4,79   | 8,17   | 1,21  | 0,71   | 0,46   | 0,27   | 0,23   |
|         | 3.       | 96,74                 | 10,51  | 2,15   | 1,10  | 0,80   | 0,46   | 0,43   | 6,07   |
|         | Avg      | 96,64                 | 7,65   | 5,16   | 1,16  | 0,76   | 0,46   | 0,35   | 3,15   |
|         | SD       | 0,14                  | 4,04   | 4,26   | 0,08  | 0,07   | 0,00   | 0,11   | 4,13   |
| dU+4    | 1.       | 78,67                 | 77,33  | 28,66  | 10,70 | 42,66  | 24,42  | 1,95   | 1,57   |
|         | 2.       | 88,25                 | 88,28  | 87,31  | 88,53 | 0,48   | 0,54   | 0,75   | 0,37   |
|         | 3.       | 87,21                 | 65,35  | 6,81   | 1,82  | 0,83   | 0,98   | 1,06   | 0,95   |
|         | Avg      | 84,71                 | 76,98  | 40,93  | 33,68 | 14,65  | 8,65   | 1,26   | 0,96   |
|         | SD       | 5,26                  | 11,47  | 41,63  | 47,70 | 24,25  | 13,67  | 0,62   | 0,60   |

\* rejected values



| ScdA    |          | Time [min]                |        |       |       |       |       |        |        |
|---------|----------|---------------------------|--------|-------|-------|-------|-------|--------|--------|
|         |          | 0                         | 1      | 5     | 15    | 30    | 60    | 90     | 120    |
| Strand  | Data set | Endonuclease activity [%] |        |       |       |       |       |        |        |
| dU0     | 1.       | 0,12                      | 80,77  | 80,85 | 75,67 | 45,25 | 71,40 | 73,56  | 71,46  |
|         | 2.       | 0,37                      | 82,46  | 79,06 | 78,28 | 76,98 | 73,28 | 74,32  | 71,59  |
|         | 3.       | 0,01                      | 86,45  | 82,57 | 80,10 | 80,24 | 78,61 | 78,87  | 79,54  |
|         | Avg      | 0,17                      | 83,23  | 80,83 | 78,02 | 67,49 | 74,43 | 75,58  | 74,20  |
|         | SD       | 0,18                      | 2,92   | 1,75  | 2,22  | 19,33 | 3,74  | 2,88   | 4,62   |
| dU-5    | 1.       | 0,00                      | 94,94  | 78,94 | 50,84 | 21,75 | 5,55  | 44,83* | 3,01   |
|         | 2.       | 0,00                      | 88,86  | 71,56 | 45,92 | 41,07 | 15,96 | 7,59   | 7,40   |
|         | 3.       | 0,00                      | 90,48  | 76,88 | 40,35 | 20,64 | 7,53  | 5,42   | 3,97   |
|         | Avg      | 0,00                      | 91,43  | 75,79 | 45,70 | 27,82 | 9,68  | 6,51   | 4,79   |
|         | SD       | 0,00                      | 3,15   | 3,81  | 5,25  | 11,49 | 5,53  | 1,53   | 2,31   |
| dU-5/+5 | 1.       | 0,00                      | 90,28  | 84,05 | 78,50 | 74,55 | 63,06 | 50,98  | 61,31* |
|         | 2.       | 0,00                      | 84,54  | 78,70 | 70,75 | 61,45 | 57,33 | 48,05  | 45,52  |
|         | 3.       | 0,00                      | 86,61  | 79,71 | 75,12 | 61,48 | 53,66 | 43,83  | 42,08  |
|         | Avg      | 0,00                      | 87,14  | 80,82 | 74,79 | 65,82 | 58,02 | 47,62  | 43,80  |
|         | SD       | 0,00                      | 2,91   | 2,84  | 3,88  | 7,56  | 4,74  | 3,59   | 2,43   |
| dU+5    | 1.       | 0,21                      | 20,30  | 83,04 | 77,61 | 72,85 | 64,01 | 48,20  | 34,86  |
|         | 2.       | 0,94                      | 34,18  | 75,84 | 76,28 | 70,73 | 33,15 | 26,99  | 38,55  |
|         | 3.       | 1,13                      | 73,13  | 71,69 | 82,74 | 73,75 | 55,11 | 42,42  | 9,40*  |
|         | Avg      | 0,76                      | 42,54  | 76,85 | 78,88 | 72,44 | 50,76 | 39,20  | 27,60  |
|         | SD       | 0,48                      | 27,38  | 5,74  | 3,41  | 1,55  | 15,88 | 10,97  | 15,87  |
| dU-1    | 1.       | 0,00                      | 39,21  | 55,39 | 42,41 | 26,06 | 16,05 | 12,22  | 11,72  |
|         | 2.       | 0,04                      | 76,37  | 65,38 | 41,77 | 27,82 | 16,48 | 13,00  | 11,55  |
|         | 3.       | 0,35                      | 62,19  | 60,10 | 49,88 | 30,97 | 16,92 | 13,48  | 12,27  |
|         | Avg      | 0,13                      | 59,26  | 60,29 | 44,68 | 28,28 | 16,48 | 12,90  | 11,85  |
|         | SD       | 0,19                      | 18,75  | 4,99  | 4,51  | 2,49  | 0,44  | 0,64   | 0,38   |
| dU-4    | 1.       | 3,06*                     | 50,59* | 60,22 | 33,05 | 5,11  | 10,06 | 5,99   | 3,85   |
|         | 2.       | 0,35                      | 97,40  | 85,14 | 49,92 | 6,21  | 2,18  | 0,75   | 2,78   |
|         | 3.       | 4,19                      | 86,93  | 77,98 | 62,72 | 31,07 | 8,21  | 0,00   | 0,35   |
|         | Avg      | 2,27                      | 92,16  | 81,56 | 56,32 | 18,64 | 5,19  | 0,38   | 1,56   |
|         | SD       | 2,72                      | 7,40   | 5,06  | 9,05  | 17,58 | 4,27  | 0,53   | 1,72   |
| dU+1    | 1.       | 0,00                      | 68,20  | 74,13 | 73,46 | 65,34 | 51,74 | 40,31  | 32,77  |
|         | 2.       | 0,48                      | 82,96  | 78,44 | 74,38 | 63,97 | 51,80 | 41,97  | 34,33  |
|         | 3.       | 0,32                      | 81,16  | 84,53 | 80,82 | 73,86 | 55,21 | 38,49  | 21,92  |
|         | Avg      | 0,27                      | 77,44  | 79,03 | 76,22 | 67,72 | 52,92 | 40,26  | 29,67  |
|         | SD       | 0,24                      | 8,05   | 5,23  | 4,01  | 5,36  | 1,99  | 1,74   | 6,76   |
| dU+4    | 1.       | 0,00                      | 1,88   | 57,25 | 78,08 | 39,53 | 44,86 | 41,78  | 32,47  |
|         | 2.       | 0,11                      | 0,12*  | 0,17* | 0,27* | 70,79 | 50,85 | 38,39  | 27,94  |
|         | 3.       | 0,58                      | 18,34  | 83,09 | 84,93 | 74,77 | 54,17 | 34,98  | 25,55  |
|         | Avg      | 0,23                      | 10,11  | 70,17 | 81,51 | 61,69 | 49,96 | 38,38  | 28,65  |
|         | SD       | 0,31                      | 11,64  | 18,27 | 4,85  | 19,30 | 4,72  | 3,40   | 3,51   |

\* rejected values

| ScdA    |          | Time [min]              |       |       |       |       |       |        |        |
|---------|----------|-------------------------|-------|-------|-------|-------|-------|--------|--------|
|         |          | 0                       | 1     | 5     | 15    | 30    | 60    | 90     | 120    |
| Strand  | Data set | Polymerase activity [%] |       |       |       |       |       |        |        |
| dU0     | 1.       | 1,97                    | 4,81  | 2,06  | 2,13  | 0,94  | 1,56  | 2,90   | 2,70   |
|         | 2.       | 1,08                    | 2,95  | 3,99  | 3,08  | 2,60  | 4,10  | 3,37   | 4,16   |
|         | 3.       | 0,69                    | 3,09  | 3,38  | 1,71  | 3,29  | 2,30  | 2,61   | 1,30   |
|         | Avg      | 1,25                    | 3,62  | 3,14  | 2,31  | 2,28  | 2,65  | 2,96   | 2,72   |
|         | SD       | 0,66                    | 1,03  | 0,98  | 0,70  | 1,21  | 1,30  | 0,39   | 1,43   |
| dU-5    | 1.       | 0,00                    | 1,91  | 18,13 | 47,68 | 77,08 | 90,06 | 53,14* | 92,35  |
|         | 2.       | 0,48                    | 6,48  | 25,07 | 53,47 | 58,24 | 80,68 | 79,05  | 80,11  |
|         | 3.       | 0,00                    | 4,14  | 19,74 | 54,06 | 77,85 | 87,82 | 90,83  | 88,50  |
|         | Avg      | 0,16                    | 4,18  | 20,98 | 51,74 | 71,06 | 86,19 | 84,94  | 86,98  |
|         | SD       | 0,28                    | 2,29  | 3,63  | 3,52  | 11,11 | 4,90  | 8,33   | 6,26   |
| dU-5/+5 | 1.       | 0,00                    | 2,95  | 9,10  | 15,97 | 18,14 | 28,90 | 32,58* | 29,20* |
|         | 2.       | 0,09                    | 9,90  | 16,87 | 26,83 | 36,87 | 37,96 | 50,82  | 52,91  |
|         | 3.       | 0,00                    | 5,30  | 9,10  | 16,40 | 27,82 | 36,28 | 48,68  | 47,83  |
|         | Avg      | 0,03                    | 6,05  | 11,69 | 19,73 | 27,61 | 34,38 | 49,75  | 50,37  |
|         | SD       | 0,05                    | 3,54  | 4,49  | 6,15  | 9,37  | 4,82  | 1,52   | 3,59   |
| dU+5    | 1.       | 0,90                    | 0,66  | 7,01  | 12,25 | 16,44 | 22,54 | 35,91  | 50,84  |
|         | 2.       | 0,14                    | 0,06  | 9,95  | 11,18 | 16,12 | 29,77 | 44,04  | 44,01  |
|         | 3.       | 4,80                    | 5,74  | 7,92  | 9,10  | 16,90 | 32,20 | 45,50  | 53,03  |
|         | Avg      | 1,95                    | 2,15  | 8,29  | 10,84 | 16,49 | 28,17 | 41,82  | 49,29  |
|         | SD       | 2,50                    | 3,12  | 1,51  | 1,60  | 0,39  | 5,03  | 5,16   | 4,71   |
| dU-1    | 1.       | 1,06                    | 3,43  | 24,19 | 41,92 | 47,66 | 34,09 | 38,42  | 35,40  |
|         | 2.       | 0,36                    | 3,63  | 25,39 | 42,84 | 58,12 | 51,39 | 42,99  | 35,25  |
|         | 3.       | 1,44                    | 6,77  | 21,12 | 36,07 | 50,66 | 52,75 | 37,62  | 31,23  |
|         | Avg      | 0,95                    | 4,61  | 23,57 | 40,28 | 52,15 | 46,08 | 39,68  | 33,96  |
|         | SD       | 0,55                    | 1,87  | 2,20  | 3,67  | 5,39  | 10,40 | 2,90   | 2,37   |
| dU-4    | 1.       | 1,64                    | 14,47 | 8,60  | 37,30 | 44,95 | 67,12 | 56,27  | 61,58  |
|         | 2.       | 0,00                    | 0,63  | 14,22 | 42,43 | 55,92 | 66,02 | 58,87  | 67,97  |
|         | 3.       | 0,53                    | 1,49  | 16,22 | 31,55 | 58,39 | 72,86 | 37,69  | 55,82  |
|         | Avg      | 0,72                    | 5,53  | 13,02 | 37,09 | 53,09 | 68,67 | 50,95  | 61,79  |
|         | SD       | 0,84                    | 7,75  | 3,95  | 5,44  | 7,16  | 3,68  | 11,55  | 6,08   |
| dU+1    | 1.       | 1,85                    | 3,94  | 8,90  | 6,35  | 4,25  | 1,43  | 1,43   | 0,20   |
|         | 2.       | 0,60                    | 4,17  | 3,46  | 4,24  | 3,43  | 1,69  | 0,47   | 0,06   |
|         | 3.       | 0,52                    | 4,35  | 4,78  | 2,28  | 1,52  | 1,27  | 0,61   | 0,42   |
|         | Avg      | 0,99                    | 4,15  | 5,71  | 4,29  | 3,07  | 1,46  | 0,84   | 0,23   |
|         | SD       | 0,74                    | 0,21  | 2,84  | 2,04  | 1,40  | 0,21  | 0,52   | 0,18   |
| dU+4    | 1.       | 9,38                    | 6,35  | 6,98  | 9,72  | 15,29 | 28,44 | 39,45  | 43,23  |
|         | 2.       | 2,55                    | 2,47  | 4,32  | 4,47  | 14,33 | 26,67 | 34,15  | 45,43  |
|         | 3.       | 5,98                    | 6,87  | 6,30  | 8,76  | 12,00 | 24,31 | 35,03  | 43,26  |
|         | Avg      | 5,97                    | 5,23  | 5,87  | 7,65  | 13,87 | 26,47 | 36,21  | 43,97  |
|         | SD       | 3,41                    | 2,41  | 1,38  | 2,80  | 1,69  | 2,07  | 2,84   | 1,27   |

\* rejected values

A.

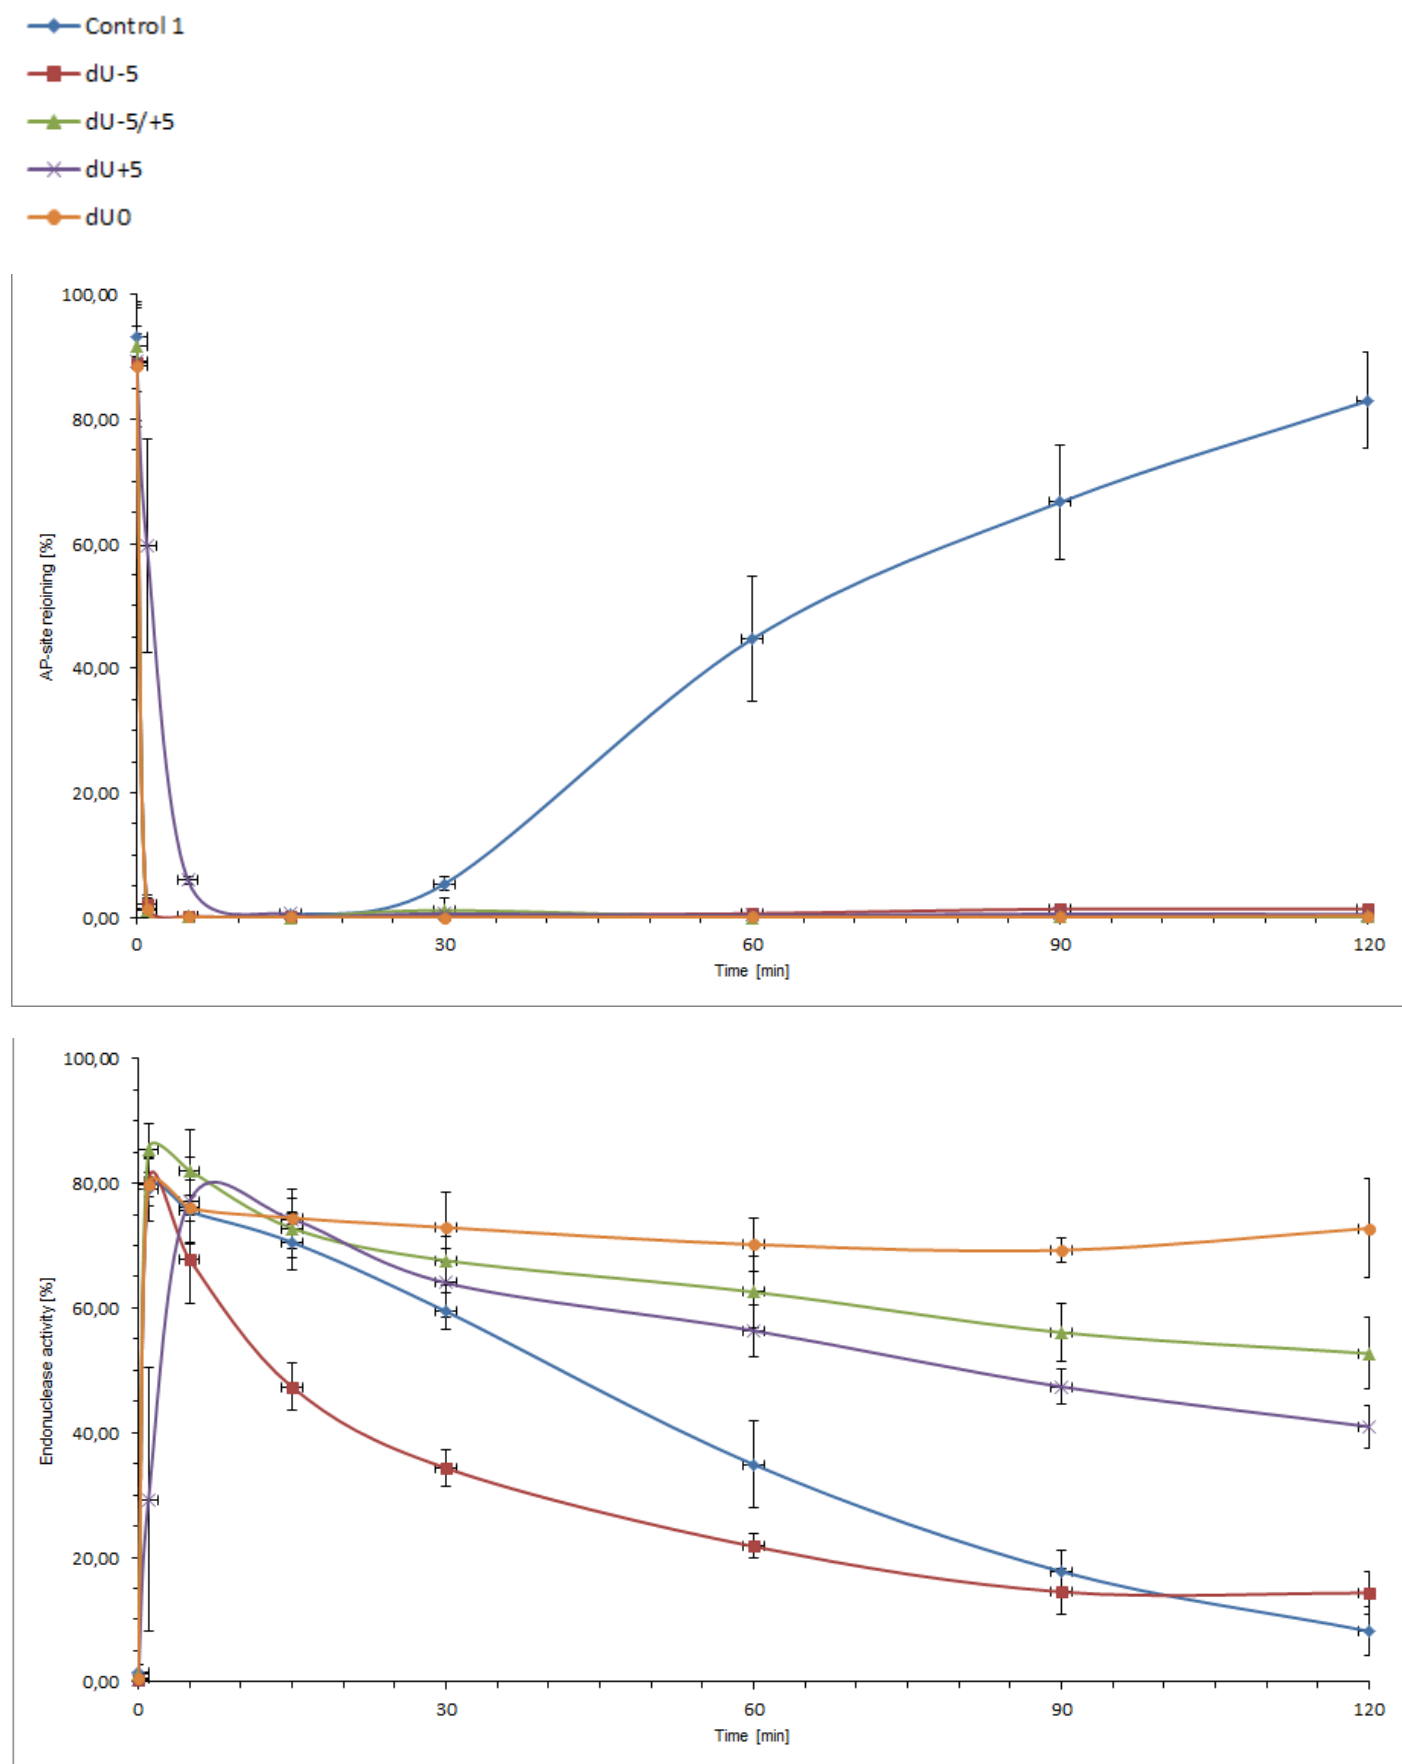

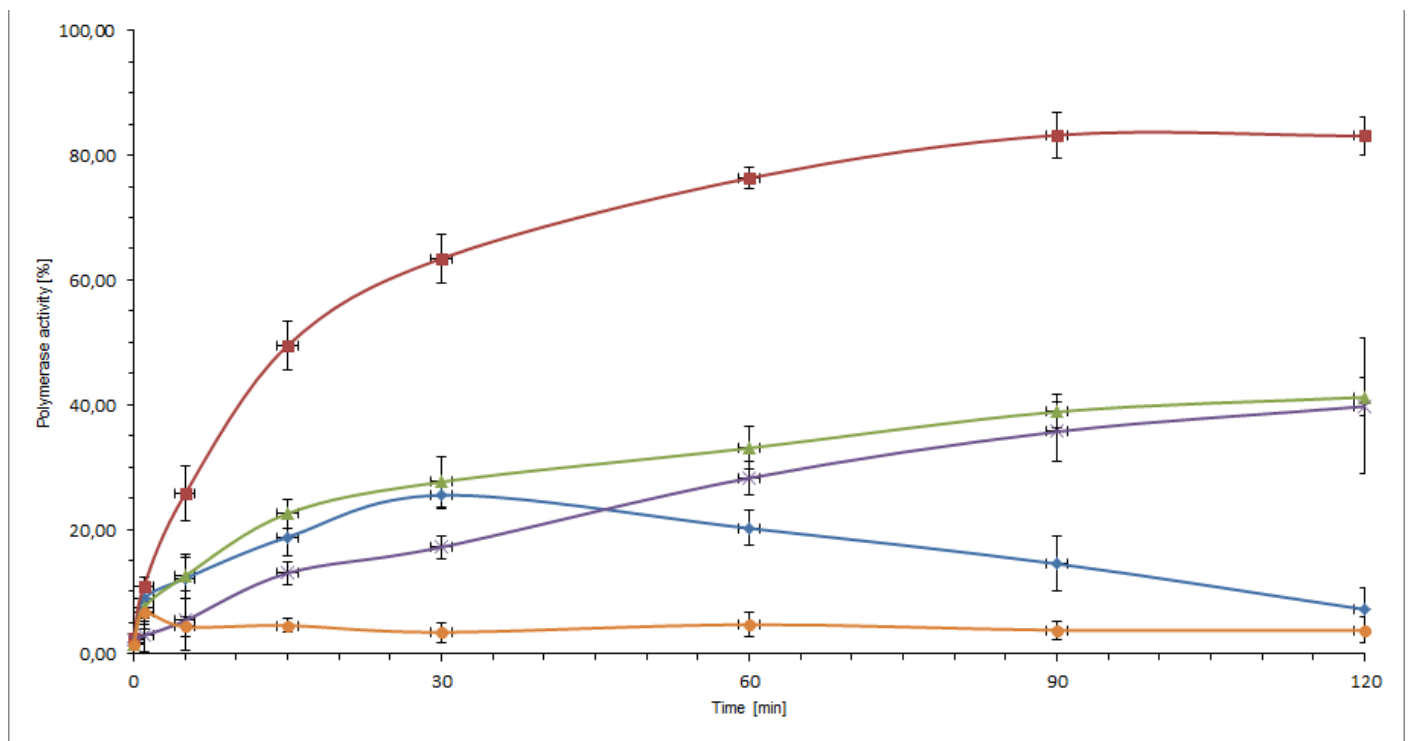

B.

- Control 1
- dU-1
- dU 0
- dU +1
- dU +4
- dU -4

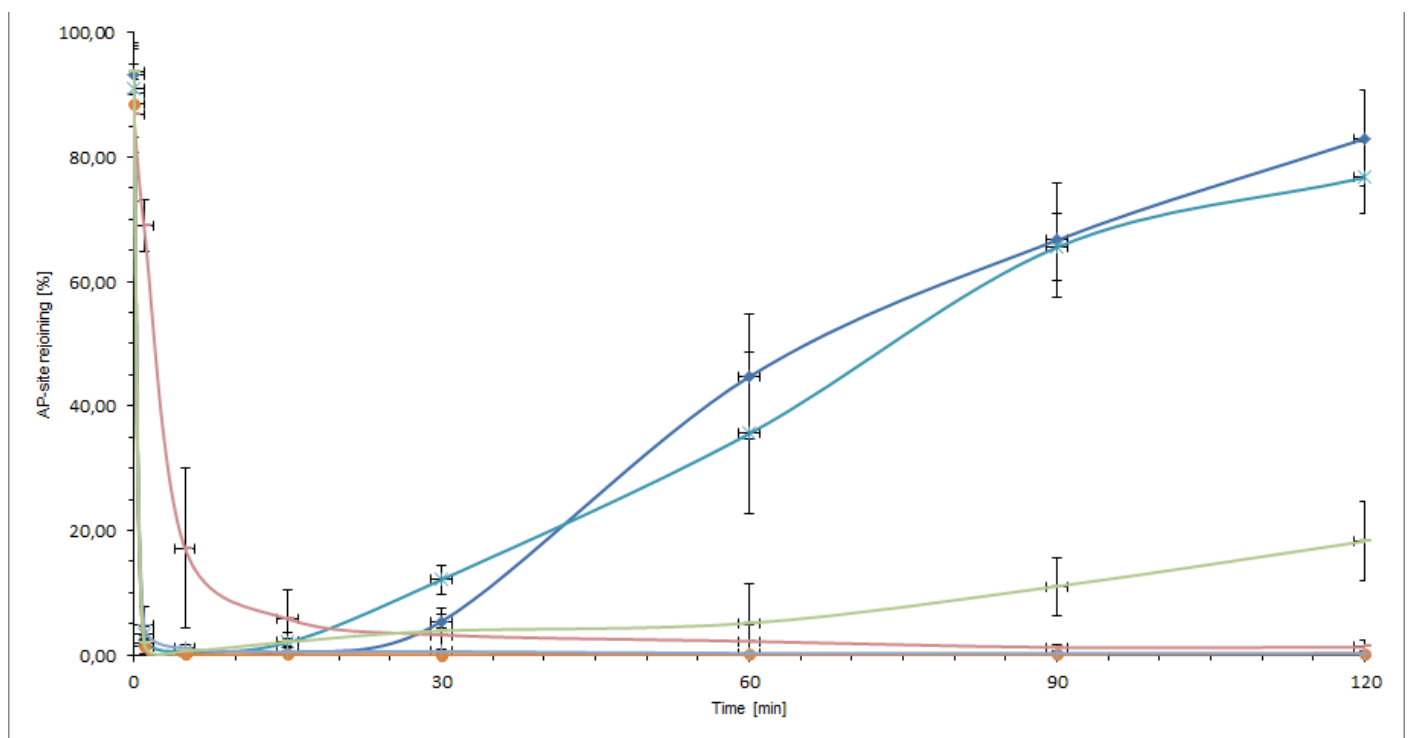

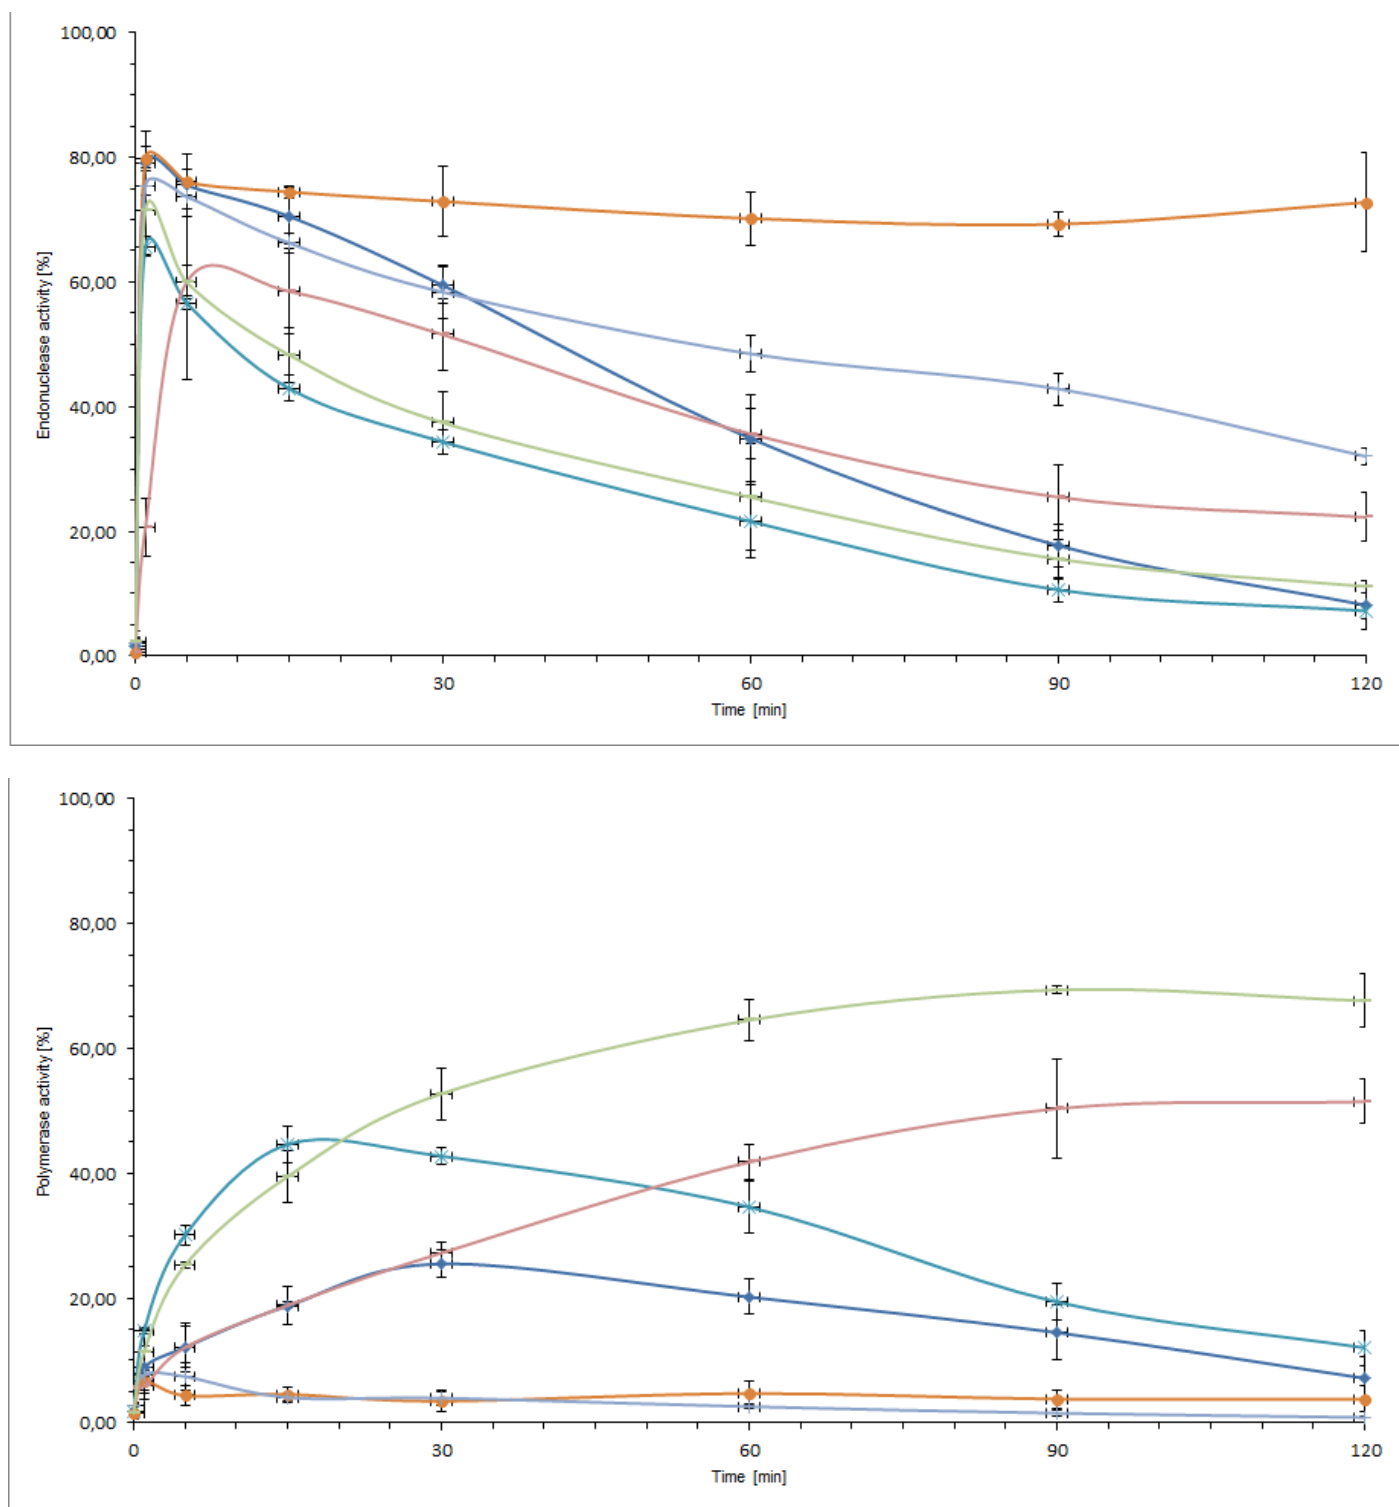

**Figure S11.** Graphical representation of DNA repair assays' results for RcdA – BJ Nuclear Extract. **(A)** ss-CDL, **(B)** ds-CDL

**Table S6.** Raw numerical data – RcdA – BJ Nuclear Extract.

| RcdA    |          | Time [min]            |       |       |       |        |        |       |       |
|---------|----------|-----------------------|-------|-------|-------|--------|--------|-------|-------|
|         |          | 0                     | 1     | 5     | 15    | 30     | 60     | 90    | 120   |
| Strand  | Data set | AP site rejoining [%] |       |       |       |        |        |       |       |
| dU0     | 1.       | 78,56                 | 0,66  | 0,10  | 0,05  | 0,03   | 0,03   | 0,04  | 0,07  |
|         | 2.       | 89,23                 | 3,38  | 0,22  | 0,05  | 0,04   | 0,10   | 0,05  | 0,56  |
|         | 3.       | 98,10                 | 0,44  | 0,10  | 0,00  | 0,00   | 0,04   | 0,09  | 0,09  |
|         | Avg      | 88,63                 | 1,49  | 0,14  | 0,03  | 0,03   | 0,06   | 0,06  | 0,24  |
|         | SD       | 9,78                  | 1,64  | 0,07  | 0,03  | 0,02   | 0,04   | 0,02  | 0,28  |
| dU-5    | 1.       | 84,34                 | 1,29  | 0,12  | 0,08  | 0,14   | 0,22   | 0,57  | 0,95  |
|         | 2.       | 88,98                 | 3,76  | 0,37  | 0,27  | 0,32   | 0,62   | 1,23  | 1,41  |
|         | 3.       | 93,76                 | 1,23  | 0,31  | 0,08  | 0,41   | 1,00   | 2,22  | 1,66  |
|         | Avg      | 89,03                 | 2,10  | 0,27  | 0,15  | 0,29   | 0,61   | 1,34  | 1,34  |
|         | SD       | 4,71                  | 1,44  | 0,13  | 0,11  | 0,14   | 0,39   | 0,83  | 0,36  |
| dU-5/+5 | 1.       | 88,41                 | 0,30  | 0,06  | 0,00  | 3,33   | 0,02   | 0,01  | 0,01  |
|         | 2.       | 93,26                 | 2,84  | 0,10  | 0,03  | 0,03   | 0,00   | 0,03  | 0,08  |
|         | 3.       | 93,88                 | 0,53  | 0,04  | 0,00  | 0,00   | 0,00   | 0,05  | 0,03  |
|         | Avg      | 91,85                 | 1,22  | 0,07  | 0,01  | 1,12   | 0,01   | 0,03  | 0,04  |
|         | SD       | 2,99                  | 1,41  | 0,03  | 0,01  | 1,92   | 0,01   | 0,02  | 0,04  |
| dU+5    | 1.       | 78,73                 | 65,11 | 5,78  | 0,91  | 1,00   | 0,21   | 0,17  | 0,23  |
|         | 2.       | 91,69                 | 73,33 | 5,47  | 0,41  | 0,18   | 0,16   | 0,48  | 0,78  |
|         | 3.       | 97,29                 | 40,41 | 6,65  | 0,28  | 19,62* | 0,65   | 1,01  | 0,48  |
|         | Avg      | 89,23                 | 59,62 | 5,97  | 0,53  | 0,59   | 0,34   | 0,56  | 0,50  |
|         | SD       | 9,52                  | 17,13 | 0,61  | 0,33  | 0,58   | 0,27   | 0,42  | 0,27  |
| dU-1    | 1.       | 79,04                 | 3,49  | 0,57  | 1,88  | 13,11  | 21,38  | 59,68 | 70,16 |
|         | 2.       | 96,29                 | 1,98  | 0,82  | 1,53  | 9,40   | 38,38  | 66,52 | 80,79 |
|         | 3.       | 98,06                 | 4,30  | 0,66  | 2,58  | 13,74  | 46,89  | 70,34 | 79,20 |
|         | Avg      | 91,13                 | 3,26  | 0,68  | 2,00  | 12,08  | 35,55  | 65,51 | 76,72 |
|         | SD       | 10,51                 | 1,18  | 0,13  | 0,53  | 2,35   | 12,99  | 5,40  | 5,73  |
| dU-4    | 1.       | 94,86                 | 2,19  | 0,73  | 1,18  | 3,43   | 1,48   | 8,28  | 14,50 |
|         | 2.       | 93,90                 | 2,07  | 0,71  | 1,17  | 3,63   | 1,55   | 8,37  | 14,58 |
|         | 3.       | 92,43                 | 1,59  | 0,54  | 3,86  | 4,48   | 12,25  | 16,41 | 25,69 |
|         | Avg      | 93,73                 | 1,95  | 0,66  | 2,07  | 3,85   | 5,09   | 11,02 | 18,26 |
|         | SD       | 1,23                  | 0,32  | 0,11  | 1,55  | 0,55   | 6,20   | 4,67  | 6,44  |
| dU+1    | 1.       | 82,31                 | 8,27  | 1,69  | 0,63  | 0,73   | 0,28   | 0,22  | 0,30  |
|         | 2.       | 96,17                 | 2,57  | 0,73  | 0,58  | 21,85* | 16,90* | 0,33  | 0,08  |
|         | 3.       | 92,40                 | 3,45  | 0,84  | 0,31  | 0,37   | 0,24   | 0,13  | 0,22  |
|         | Avg      | 90,30                 | 4,76  | 1,09  | 0,51  | 0,55   | 0,26   | 0,23  | 0,20  |
|         | SD       | 7,17                  | 3,07  | 0,53  | 0,18  | 0,26   | 0,03   | 0,10  | 0,11  |
| dU+4    | 1.       | 70,64                 | 65,04 | 31,89 | 10,55 | 8,26   | 0,96   | 1,69  | 0,73  |
|         | 2.       | 94,72                 | 68,42 | 10,48 | 1,07  | 0,76   | 0,49   | 0,81  | 0,57  |
|         | 3.       | 95,10                 | 73,44 | 8,91  | 5,72  | 0,60   | 5,11   | 1,08  | 2,49  |
|         | Avg      | 86,82                 | 68,97 | 17,10 | 5,78  | 3,21   | 2,18   | 1,19  | 1,26  |
|         | SD       | 14,02                 | 4,22  | 12,84 | 4,74  | 4,38   | 2,54   | 0,45  | 1,06  |

\* rejected values

| RcdA    |          | Time [min]                |       |       |       |       |       |       |       |
|---------|----------|---------------------------|-------|-------|-------|-------|-------|-------|-------|
|         |          | 0                         | 1     | 5     | 15    | 30    | 60    | 90    | 120   |
| Strand  | Data set | Endonuclease activity [%] |       |       |       |       |       |       |       |
| dU0     | 1.       | 0,27                      | 80,91 | 77,01 | 75,57 | 79,49 | 75,05 | 71,49 | 81,81 |
|         | 2.       | 0,99                      | 80,93 | 77,51 | 74,21 | 69,31 | 68,70 | 68,69 | 67,37 |
|         | 3.       | 0,31                      | 77,60 | 73,64 | 73,61 | 69,95 | 66,85 | 67,65 | 69,26 |
|         | Avg      | 0,52                      | 79,82 | 76,05 | 74,46 | 72,92 | 70,20 | 69,27 | 72,81 |
|         | SD       | 0,41                      | 1,92  | 2,11  | 1,01  | 5,70  | 4,30  | 1,99  | 7,85  |
| dU-5    | 1.       | 0,16                      | 75,72 | 61,31 | 46,14 | 35,93 | 22,36 | 12,24 | 13,07 |
|         | 2.       | 0,04                      | 82,70 | 75,39 | 51,58 | 36,12 | 23,30 | 18,62 | 18,12 |
|         | 3.       | 0,80                      | 82,03 | 66,69 | 44,24 | 30,91 | 19,57 | 12,53 | 11,67 |
|         | Avg      | 0,33                      | 80,15 | 67,80 | 47,32 | 34,32 | 21,75 | 14,46 | 14,29 |
|         | SD       | 0,41                      | 3,85  | 7,10  | 3,81  | 2,96  | 1,94  | 3,61  | 3,39  |
| dU-5/+5 | 1.       | 0,00                      | 90,30 | 85,48 | 75,26 | 69,97 | 60,84 | 56,61 | 52,01 |
|         | 2.       | 0,93                      | 82,44 | 86,04 | 75,85 | 69,75 | 69,04 | 60,46 | 58,76 |
|         | 3.       | 2,86                      | 83,41 | 74,59 | 67,31 | 63,16 | 57,83 | 51,19 | 47,34 |
|         | Avg      | 1,26                      | 85,38 | 82,03 | 72,81 | 67,63 | 62,57 | 56,09 | 52,70 |
|         | SD       | 1,46                      | 4,28  | 6,45  | 4,77  | 3,87  | 5,80  | 4,66  | 5,74  |
| dU+5    | 1.       | 0,35                      | 16,42 | 69,42 | 68,79 | 65,09 | 51,84 | 44,07 | 38,93 |
|         | 2.       | 0,48                      | 17,71 | 82,95 | 76,45 | 69,03 | 57,39 | 48,61 | 44,99 |
|         | 3.       | 0,11                      | 53,58 | 79,09 | 77,56 | 58,01 | 59,88 | 49,43 | 38,98 |
|         | Avg      | 0,31                      | 29,24 | 77,15 | 74,27 | 64,04 | 56,37 | 47,37 | 40,97 |
|         | SD       | 0,19                      | 21,10 | 6,97  | 4,77  | 5,58  | 4,12  | 2,89  | 3,48  |
| dU-1    | 1.       | 0,48                      | 66,42 | 56,59 | 41,03 | 33,92 | 27,34 | 11,74 | 8,66  |
|         | 2.       | 2,09                      | 63,82 | 55,59 | 45,08 | 36,57 | 21,62 | 11,63 | 6,26  |
|         | 3.       | 0,66                      | 66,75 | 57,75 | 42,70 | 32,56 | 15,79 | 8,48  | 6,79  |
|         | Avg      | 1,07                      | 65,66 | 56,64 | 42,93 | 34,35 | 21,59 | 10,62 | 7,24  |
|         | SD       | 0,88                      | 1,61  | 1,08  | 2,04  | 2,04  | 5,77  | 1,85  | 1,26  |
| dU-4    | 1.       | 1,53                      | 69,47 | 59,98 | 45,80 | 39,83 | 29,06 | 15,14 | 10,83 |
|         | 2.       | 2,17                      | 65,67 | 57,23 | 45,68 | 40,79 | 31,58 | 18,93 | 12,28 |
|         | 3.       | 3,06                      | 79,19 | 62,78 | 53,44 | 31,65 | 15,76 | 12,57 | 10,36 |
|         | Avg      | 2,25                      | 71,44 | 60,00 | 48,31 | 37,42 | 25,47 | 15,55 | 11,15 |
|         | SD       | 0,77                      | 6,97  | 2,78  | 4,45  | 5,02  | 8,50  | 3,20  | 1,00  |
| dU+1    | 1.       | 0,61                      | 71,16 | 71,38 | 64,52 | 62,02 | 49,85 | 40,77 | 31,20 |
|         | 2.       | 1,12                      | 78,47 | 75,33 | 66,65 | 53,59 | 45,01 | 45,73 | 33,65 |
|         | 3.       | 4,18                      | 76,58 | 74,33 | 67,64 | 59,54 | 50,60 | 42,06 | 31,21 |
|         | Avg      | 1,97                      | 75,41 | 73,68 | 66,27 | 58,38 | 48,49 | 42,85 | 32,02 |
|         | SD       | 1,93                      | 3,79  | 2,06  | 1,59  | 4,33  | 3,03  | 2,57  | 1,41  |
| dU+4    | 1.       | 0,33                      | 1,57* | 42,71 | 52,12 | 45,10 | 32,95 | 19,60 | 18,74 |
|         | 2.       | 0,42                      | 23,97 | 72,90 | 65,75 | 55,68 | 40,33 | 27,18 | 26,50 |
|         | 3.       | 0,85                      | 17,36 | 64,27 | 57,67 | 53,90 | 33,59 | 29,71 | 21,54 |
|         | Avg      | 0,53                      | 20,67 | 59,96 | 58,51 | 51,56 | 35,63 | 25,50 | 22,26 |
|         | SD       | 0,28                      | 4,67  | 15,55 | 6,85  | 5,66  | 4,09  | 5,26  | 3,93  |

\* rejected values

| RcdA    |          | Time [min]              |       |       |       |       |       |       |       |
|---------|----------|-------------------------|-------|-------|-------|-------|-------|-------|-------|
|         |          | 0                       | 1     | 5     | 15    | 30    | 60    | 90    | 120   |
| Strand  | Data set | Polymerase activity [%] |       |       |       |       |       |       |       |
| dU0     | 1.       | 2,20                    | 5,38  | 2,98  | 3,62  | 1,67  | 2,54  | 2,18  | 2,40  |
|         | 2.       | 1,53                    | 5,51  | 3,94  | 5,66  | 4,44  | 6,11  | 4,22  | 2,82  |
|         | 3.       | 1,11                    | 8,82  | 6,21  | 4,46  | 4,39  | 5,52  | 5,08  | 6,17  |
|         | Avg      | 1,61                    | 6,57  | 4,38  | 4,58  | 3,50  | 4,72  | 3,83  | 3,80  |
|         | SD       | 0,55                    | 1,95  | 1,66  | 1,03  | 1,59  | 1,91  | 1,49  | 2,07  |
| dU-5    | 1.       | 2,01                    | 11,51 | 27,65 | 47,36 | 59,61 | 75,34 | 86,49 | 84,99 |
|         | 2.       | 2,51                    | 10,83 | 20,62 | 47,15 | 63,18 | 75,50 | 79,36 | 79,50 |
|         | 3.       | 3,11                    | 10,42 | 28,76 | 53,95 | 67,56 | 78,22 | 83,87 | 84,82 |
|         | Avg      | 2,54                    | 10,92 | 25,68 | 49,49 | 63,45 | 76,35 | 83,24 | 83,10 |
|         | SD       | 0,55                    | 0,55  | 4,41  | 3,87  | 3,98  | 1,62  | 3,61  | 3,12  |
| dU-5/+5 | 1.       | 0,95                    | 3,68  | 10,43 | 20,28 | 23,09 | 34,48 | 36,86 | 39,76 |
|         | 2.       | 1,92                    | 10,14 | 10,46 | 22,49 | 28,74 | 29,12 | 37,80 | 39,09 |
|         | 3.       | 1,82                    | 8,49  | 16,62 | 24,87 | 31,03 | 35,54 | 41,93 | 44,75 |
|         | Avg      | 1,56                    | 7,44  | 12,50 | 22,55 | 27,62 | 33,05 | 38,86 | 41,20 |
|         | SD       | 0,53                    | 3,36  | 3,56  | 2,30  | 4,08  | 3,44  | 2,70  | 3,09  |
| dU+5    | 1.       | 4,49                    | 3,62  | 9,52  | 13,44 | 19,00 | 30,48 | 40,51 | 42,29 |
|         | 2.       | 0,03                    | 0,02  | 0,02  | 14,54 | 15,44 | 25,30 | 30,84 | 27,77 |
|         | 3.       | 2,61                    | 5,23  | 6,51  | 10,94 | 17,02 | 28,88 | 35,64 | 49,11 |
|         | Avg      | 2,38                    | 2,96  | 5,35  | 12,98 | 17,15 | 28,22 | 35,66 | 39,72 |
|         | SD       | 2,24                    | 2,67  | 4,85  | 1,85  | 1,78  | 2,65  | 4,84  | 10,90 |
| dU-1    | 1.       | 3,56                    | 15,15 | 31,34 | 48,02 | 41,63 | 39,47 | 22,74 | 15,27 |
|         | 2.       | 0,87                    | 14,35 | 30,69 | 42,64 | 42,19 | 32,44 | 17,86 | 10,05 |
|         | 3.       | 0,75                    | 14,60 | 28,19 | 43,13 | 44,38 | 31,86 | 17,54 | 10,79 |
|         | Avg      | 1,73                    | 14,70 | 30,07 | 44,60 | 42,73 | 34,59 | 19,38 | 12,03 |
|         | SD       | 1,59                    | 0,41  | 1,66  | 2,98  | 1,45  | 4,23  | 2,91  | 2,82  |
| dU-4    | 1.       | 1,33                    | 15,89 | 25,55 | 42,37 | 50,26 | 62,02 | 69,55 | 69,37 |
|         | 2.       | 1,30                    | 9,25  | 25,60 | 41,32 | 50,42 | 63,19 | 69,94 | 70,74 |
|         | 3.       | 2,11                    | 8,89  | 24,67 | 34,69 | 57,52 | 68,33 | 68,62 | 62,73 |
|         | Avg      | 1,58                    | 11,34 | 25,27 | 39,46 | 52,74 | 64,51 | 69,37 | 67,61 |
|         | SD       | 0,46                    | 3,94  | 0,53  | 4,17  | 4,15  | 3,36  | 0,68  | 4,28  |
| dU+1    | 1.       | 3,03                    | 9,50  | 9,77  | 4,31  | 4,45  | 2,23  | 1,15  | 0,70  |
|         | 2.       | 2,53                    | 6,39  | 5,41  | 3,28  | 2,69  | 2,57  | 1,56  | 0,89  |
|         | 3.       | 2,70                    | 7,43  | 7,12  | 4,64  | 4,82  | 3,04  | 1,97  | 1,04  |
|         | Avg      | 2,75                    | 7,77  | 7,43  | 4,07  | 3,98  | 2,61  | 1,56  | 0,88  |
|         | SD       | 0,25                    | 1,58  | 2,20  | 0,71  | 1,14  | 0,41  | 0,41  | 0,17  |
| dU+4    | 1.       | 8,27                    | 3,64  | 8,13  | 19,01 | 25,64 | 44,43 | 58,73 | 55,51 |
|         | 2.       | 4,72                    | 6,11  | 11,98 | 19,19 | 29,04 | 42,22 | 49,45 | 48,92 |
|         | 3.       | 3,84                    | 7,82  | 16,15 | 18,24 | 27,02 | 38,71 | 42,87 | 49,96 |
|         | Avg      | 5,61                    | 5,86  | 12,08 | 18,81 | 27,23 | 41,79 | 50,35 | 51,47 |
|         | SD       | 2,34                    | 2,10  | 4,01  | 0,51  | 1,71  | 2,88  | 7,97  | 3,54  |

\* rejected values



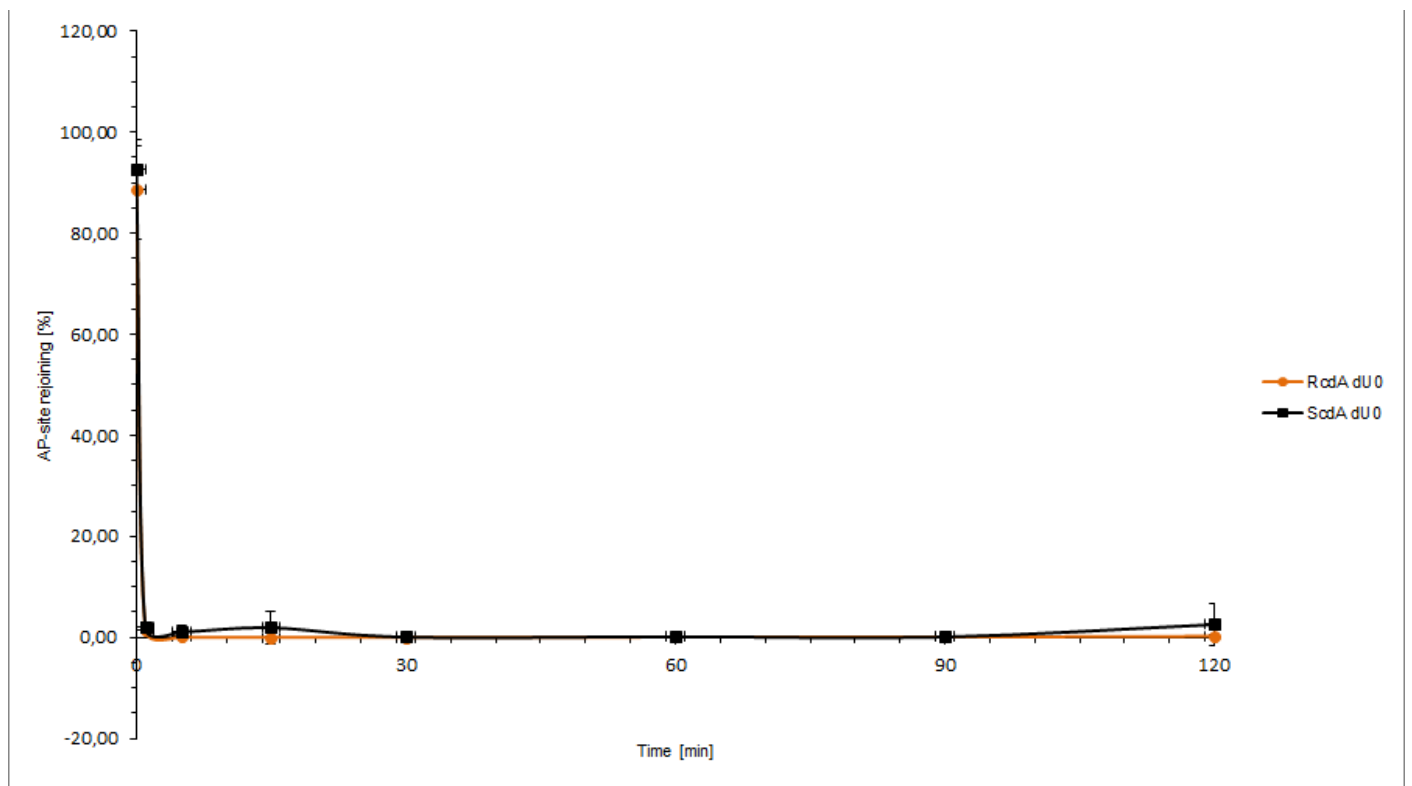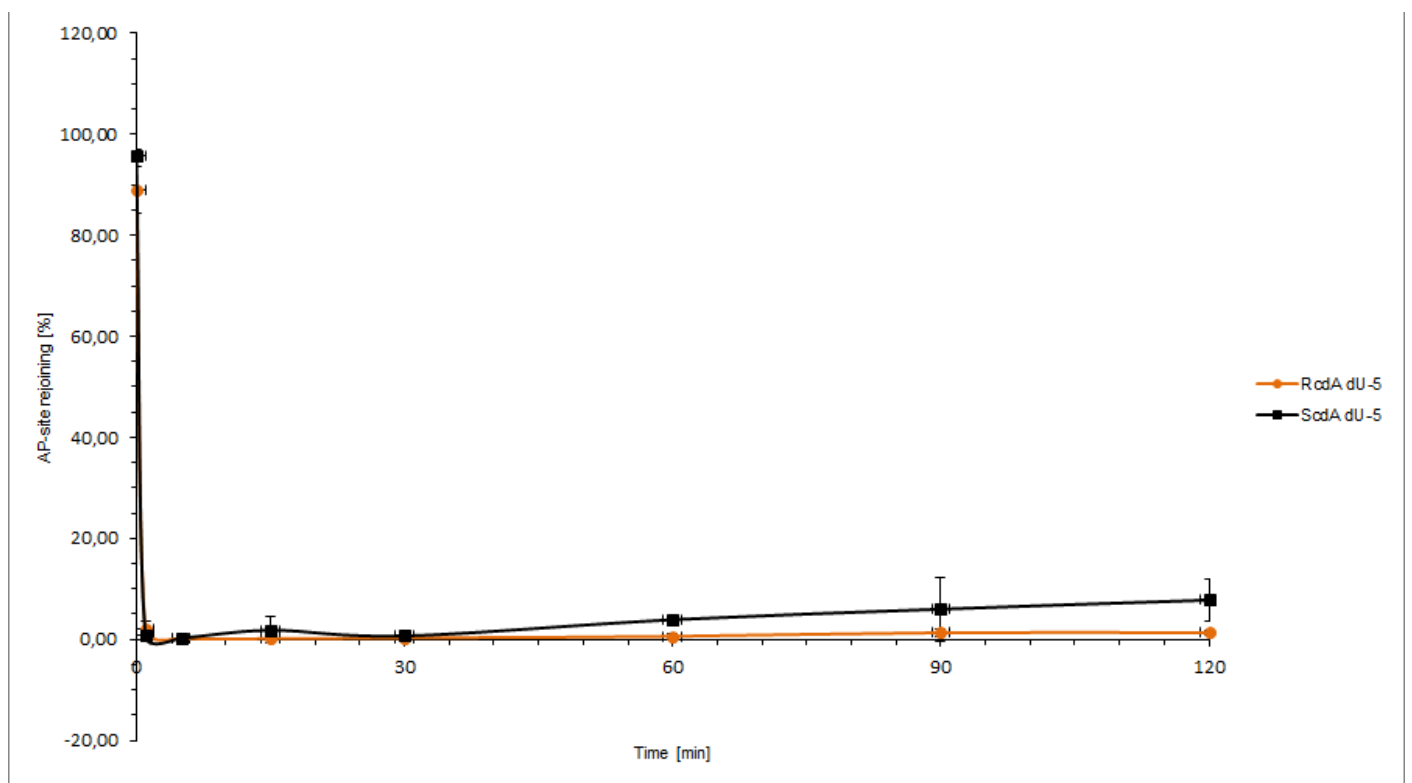

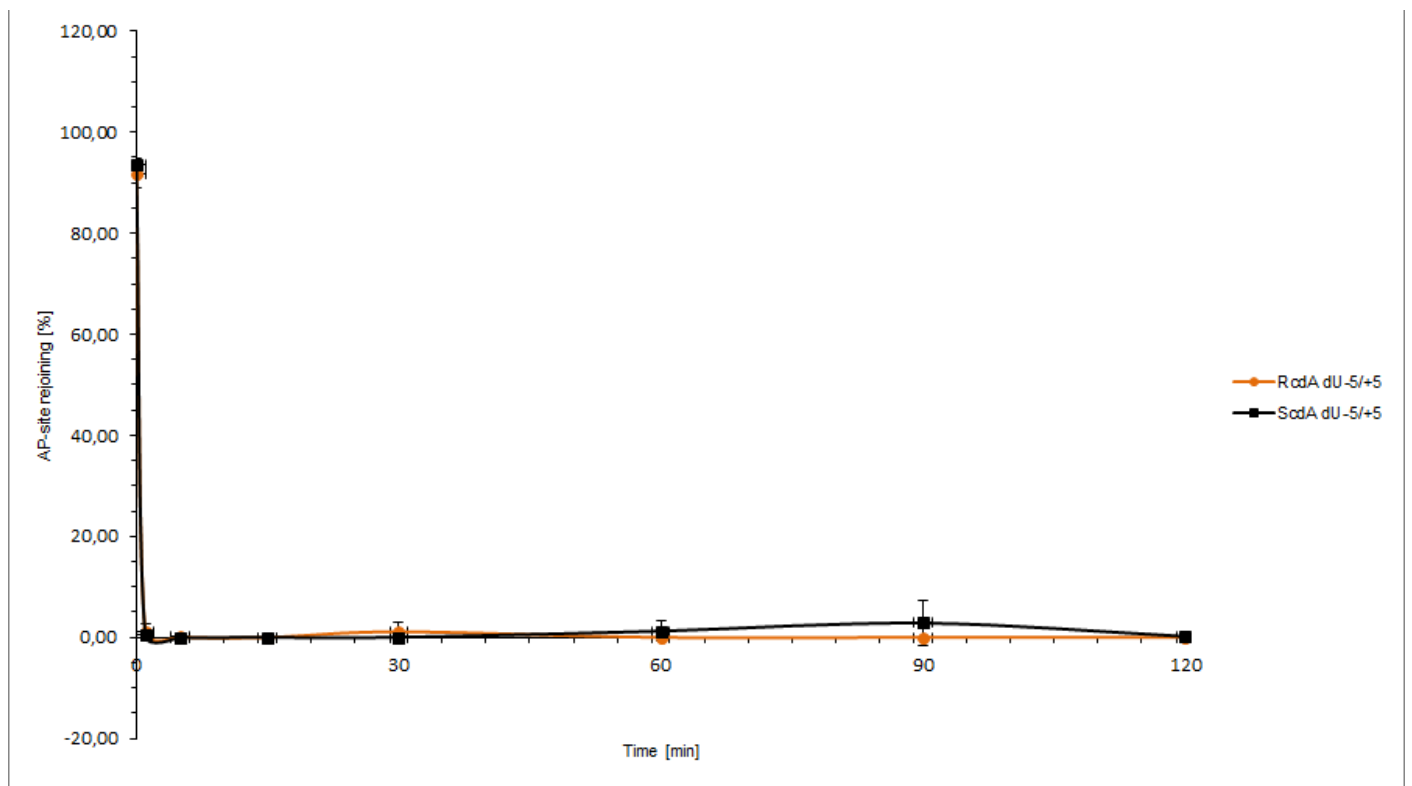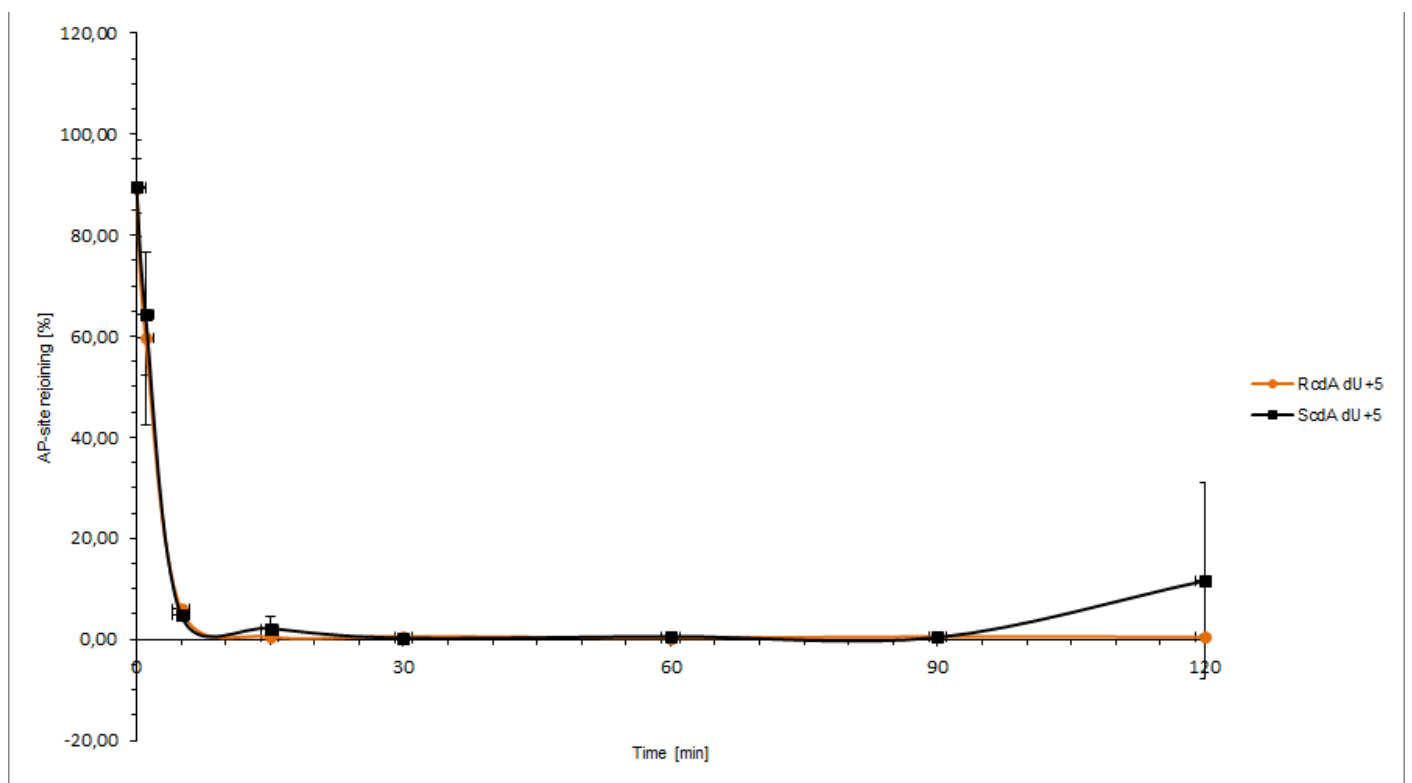

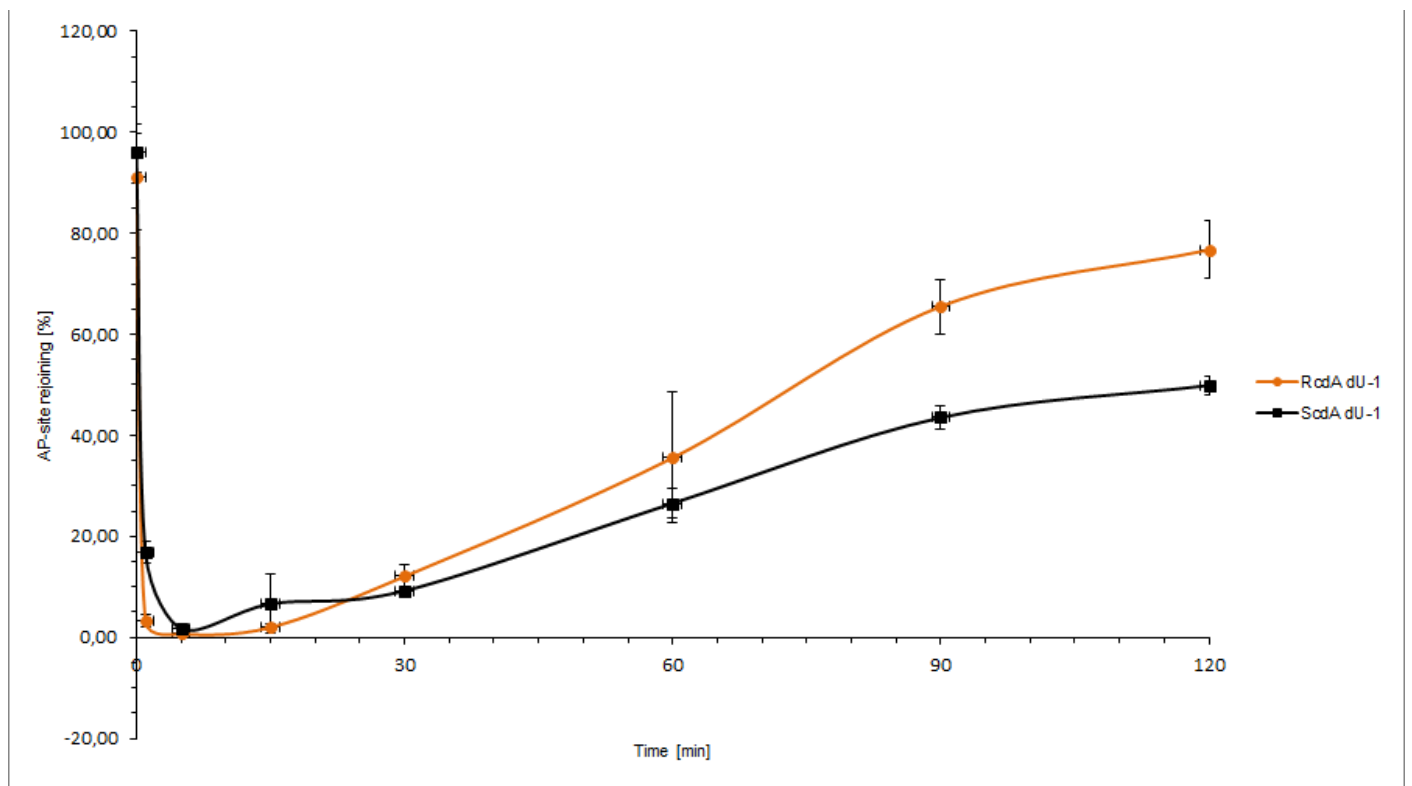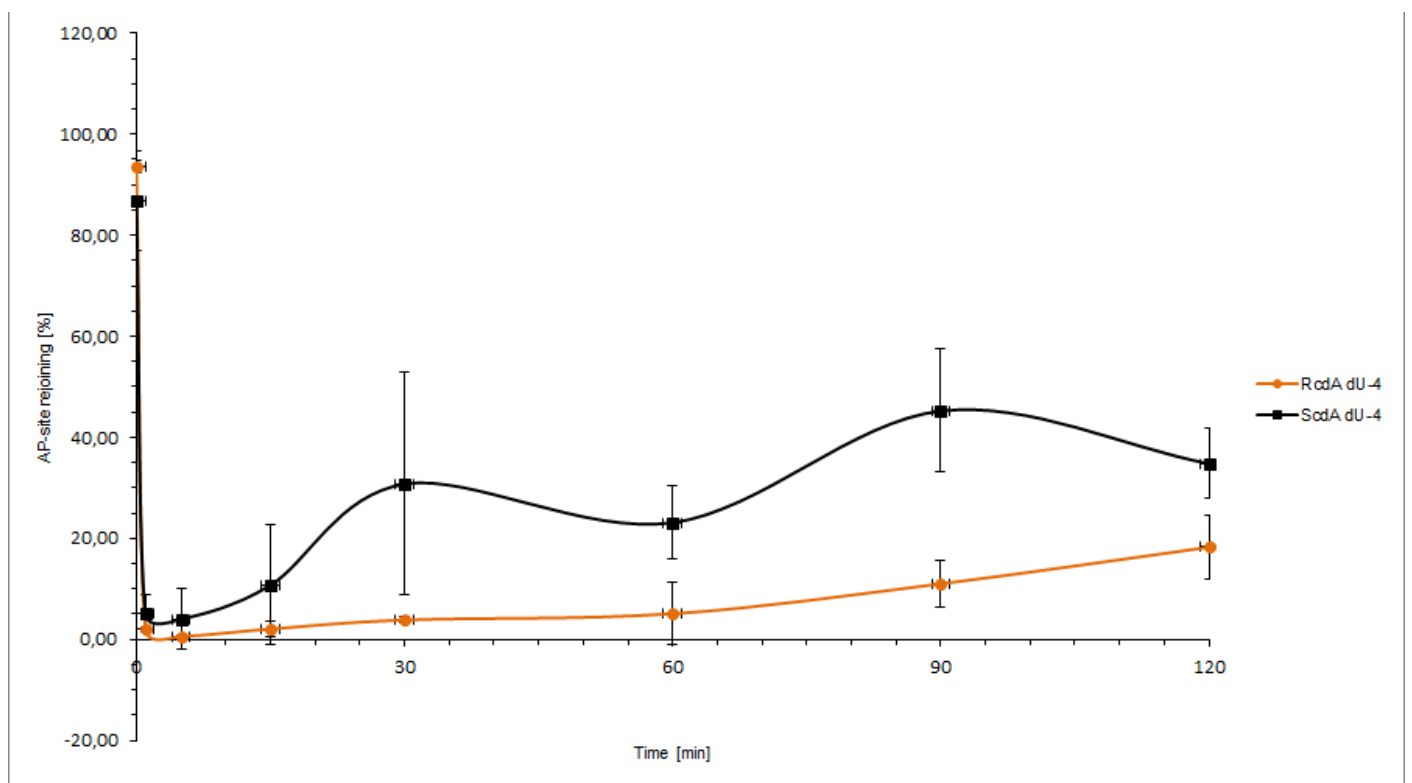

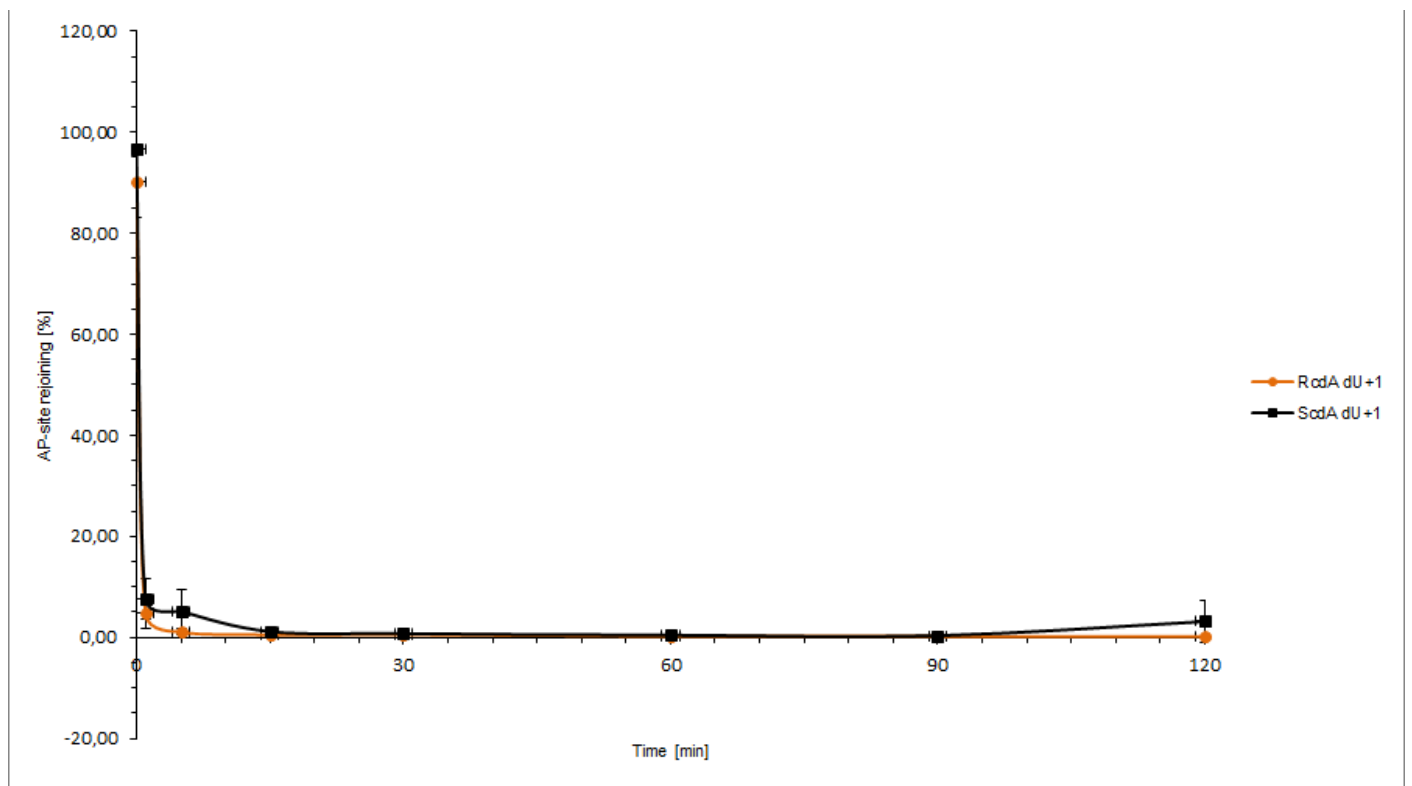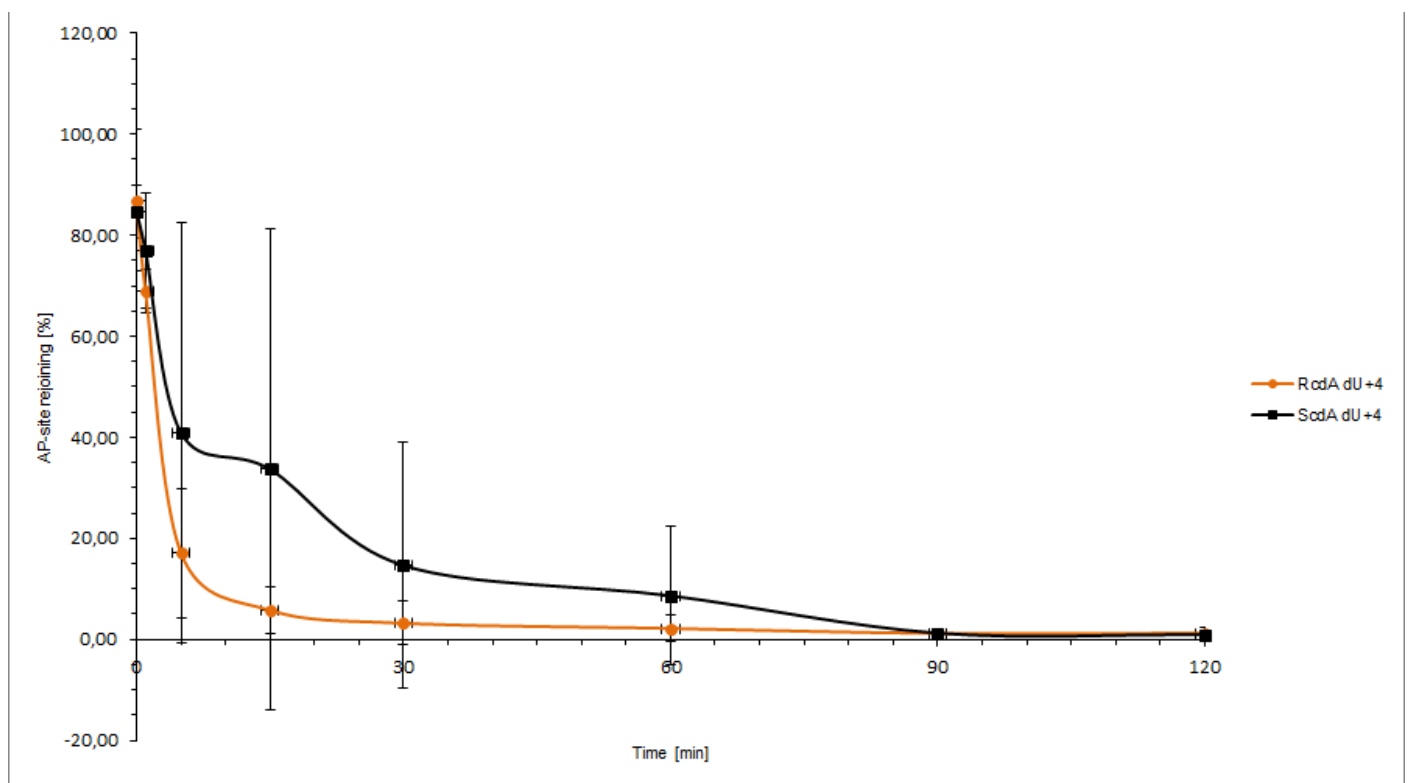

**Figure S12.** AP site rejoining [%] of ScdA vs. RcdA – comparison of individual strands – BJ Nuclear Extract.

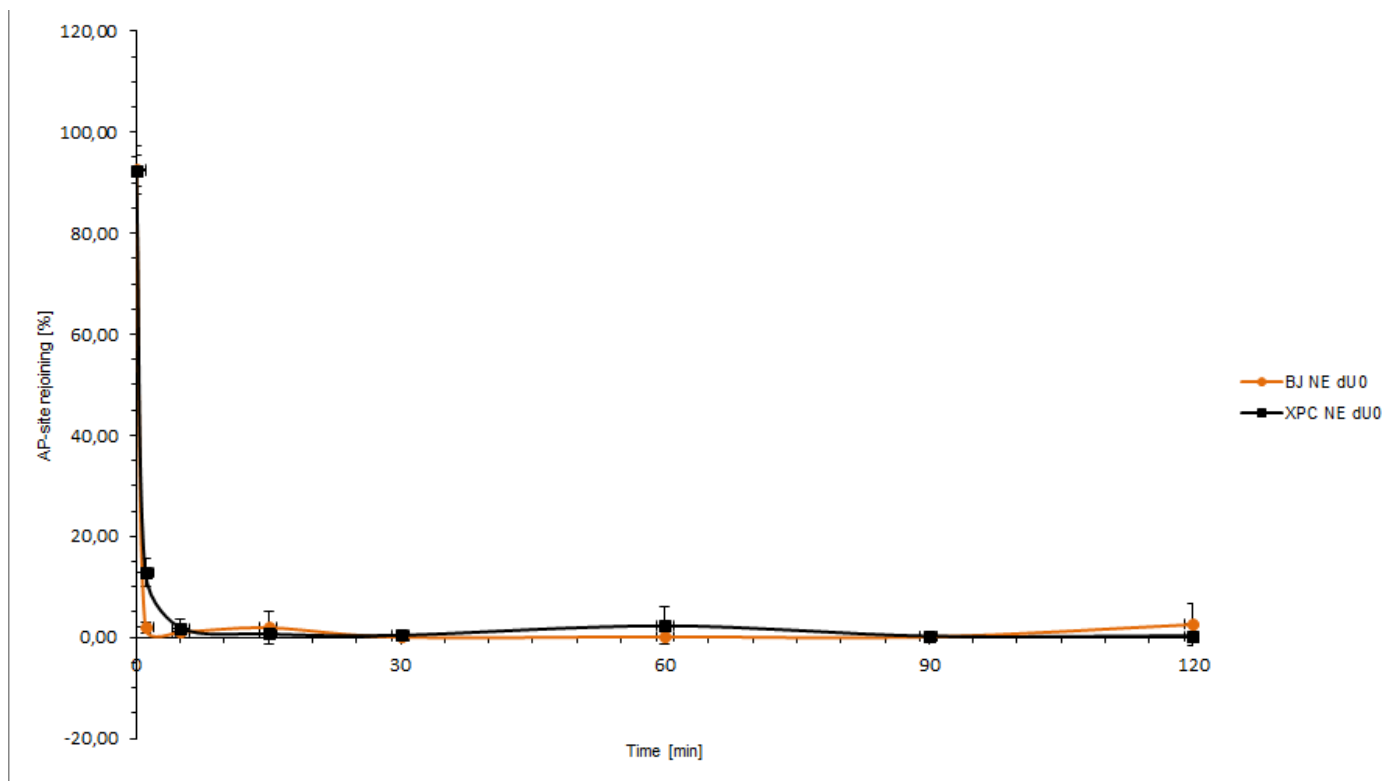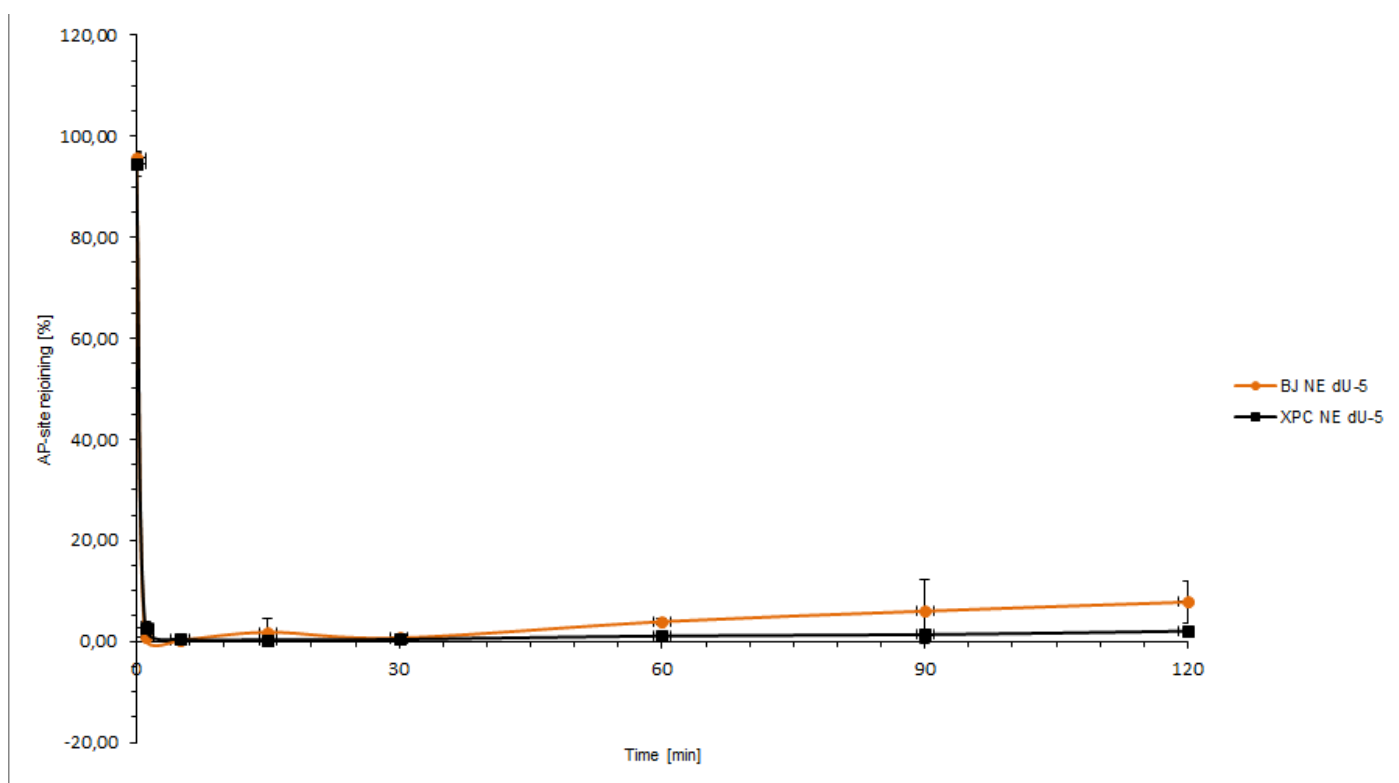

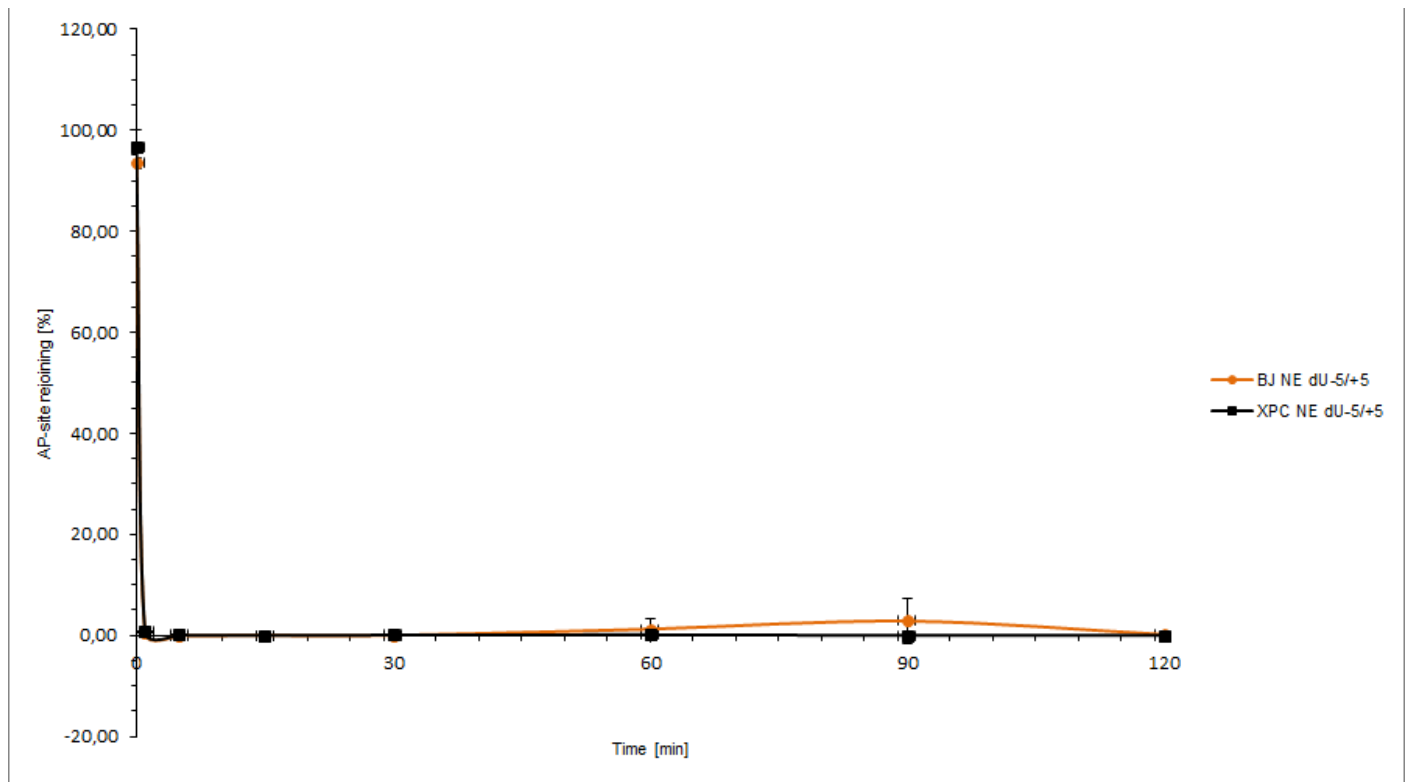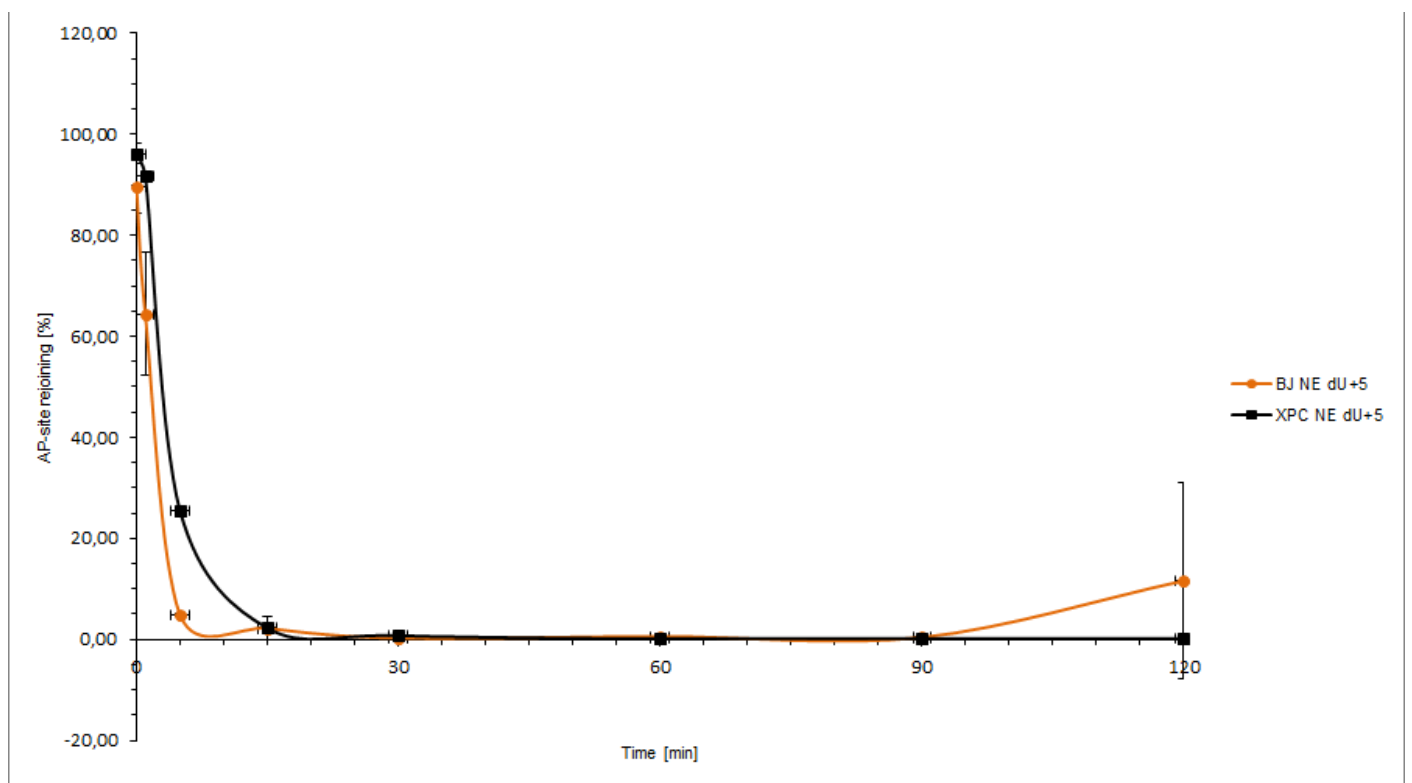

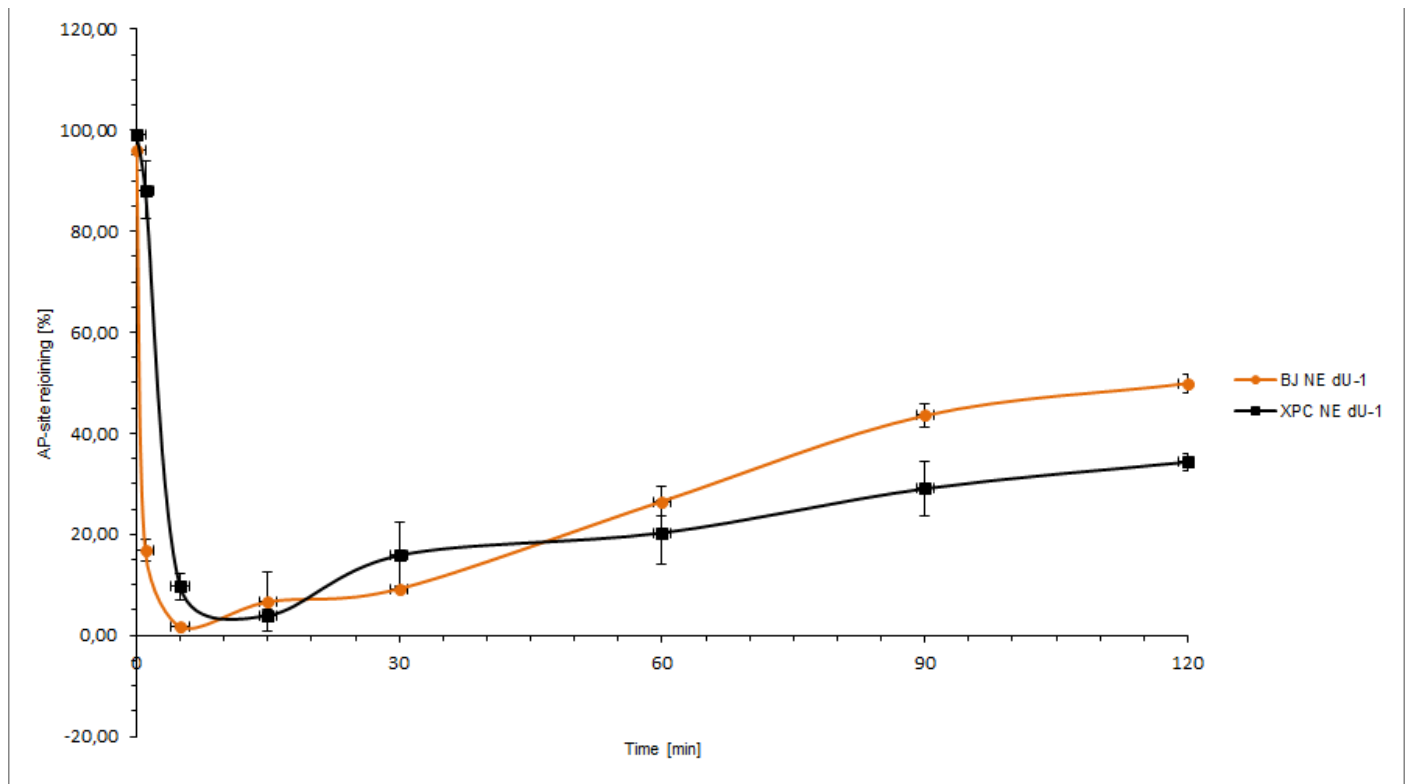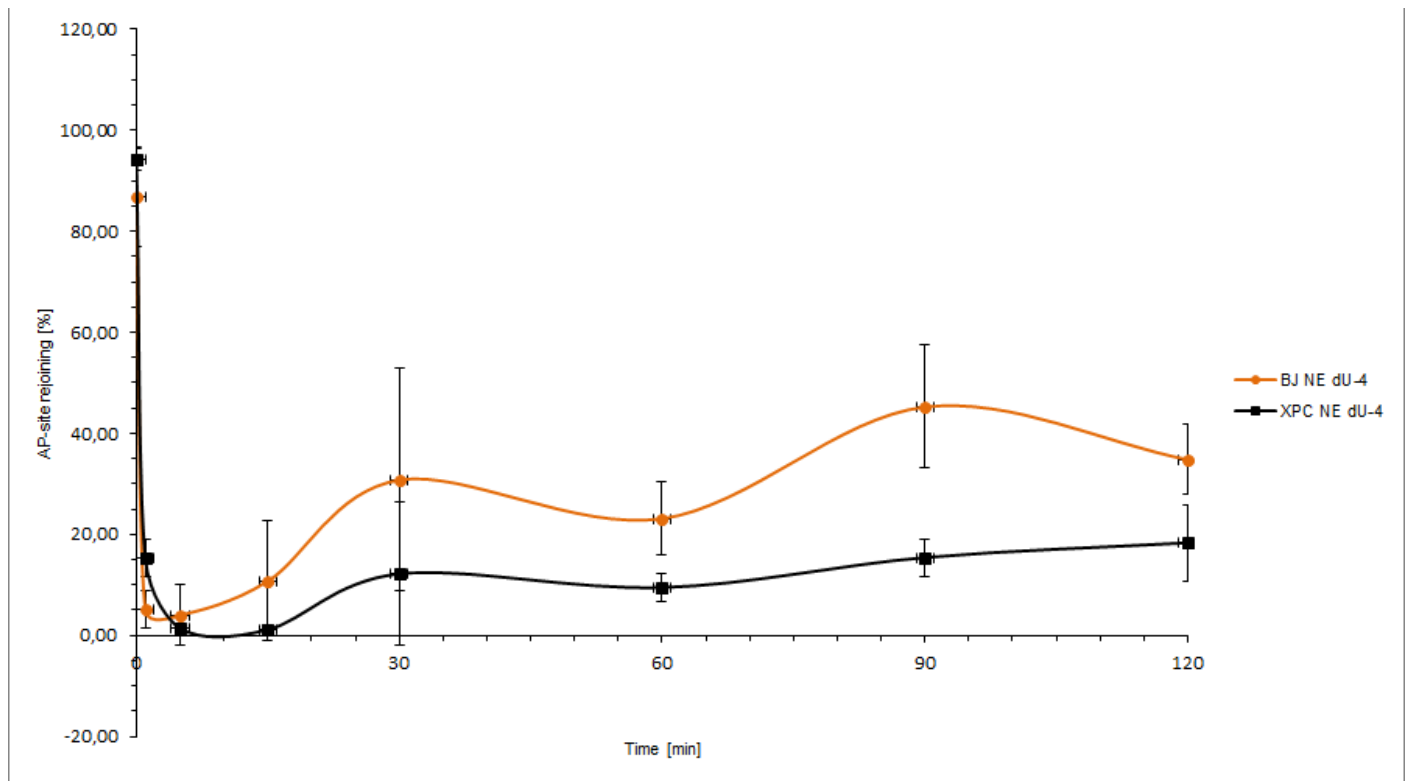

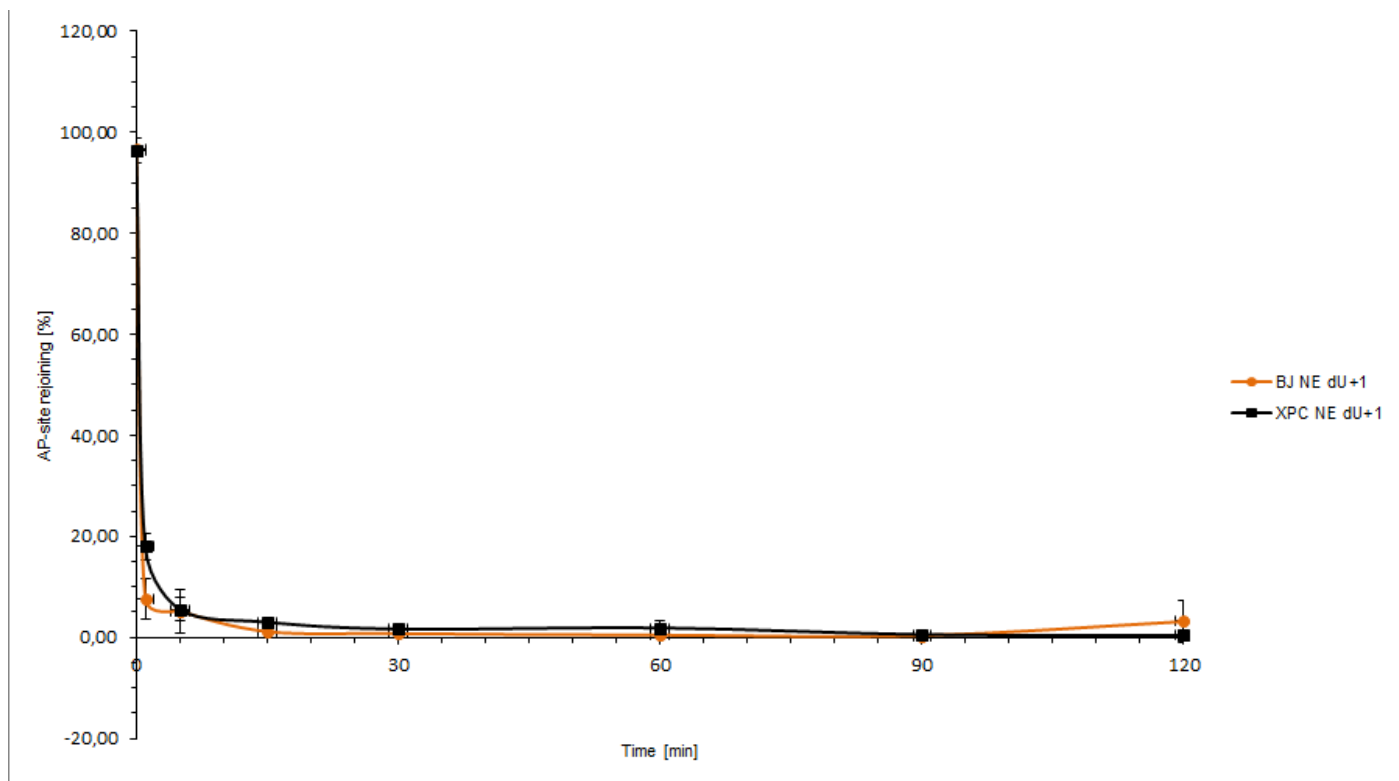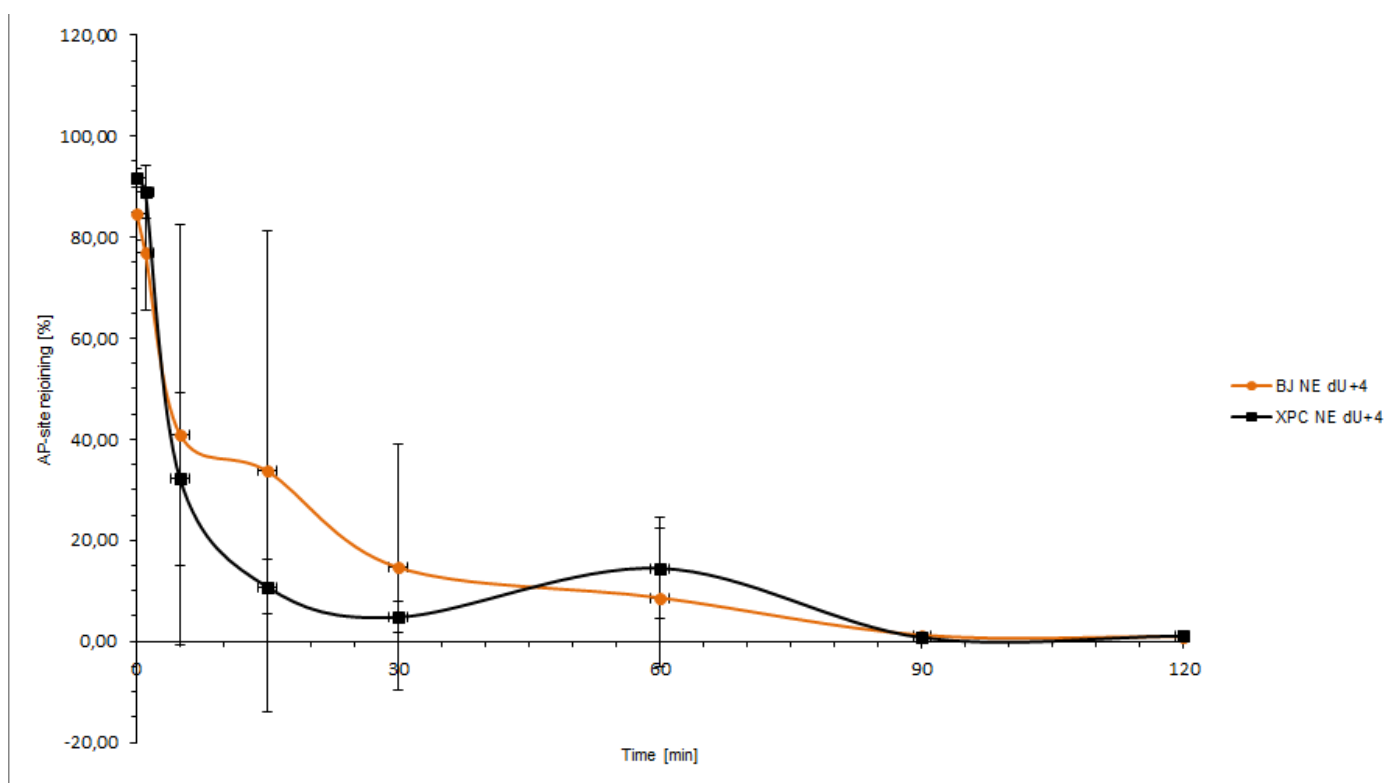

**Figure S13.** AP site rejoining [%] of BJ vs. XPC – comparison of individual strands – ScdA Nuclear Extract.



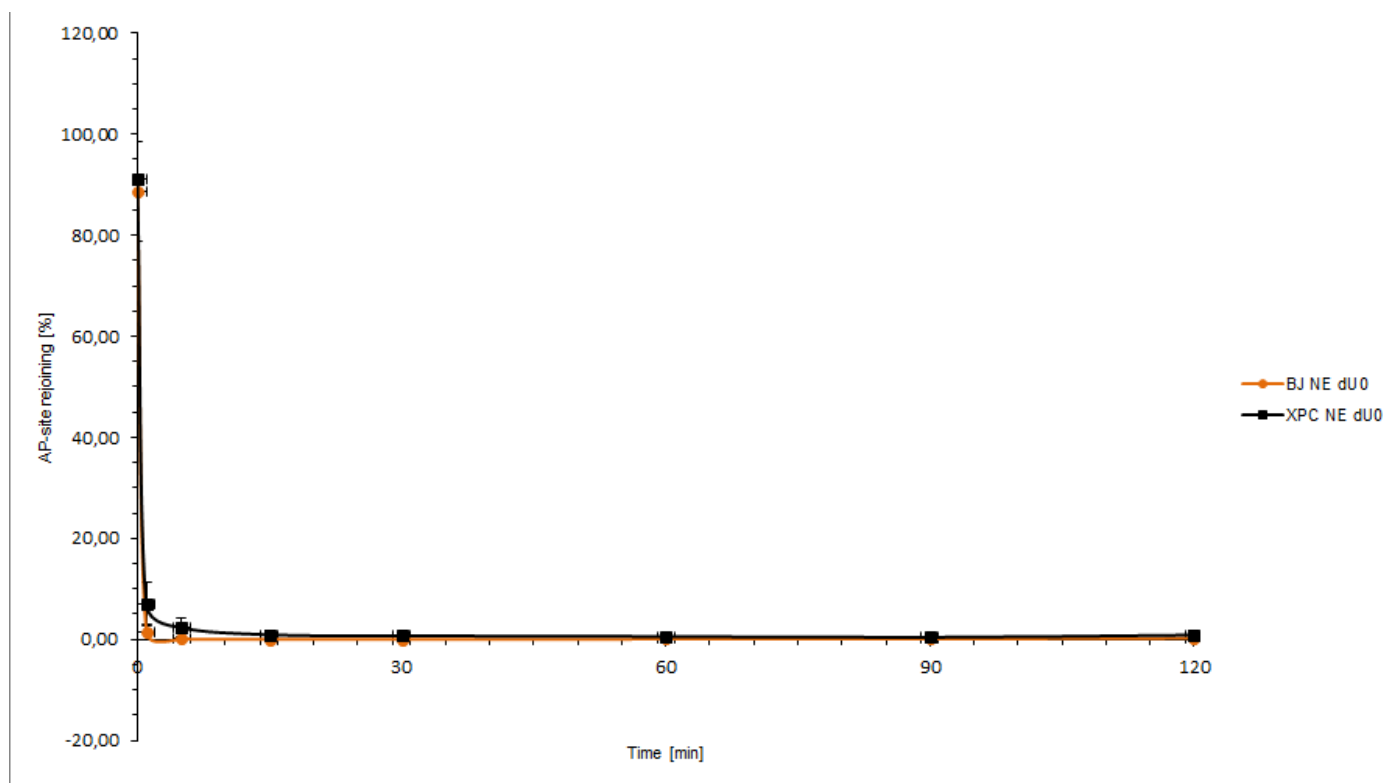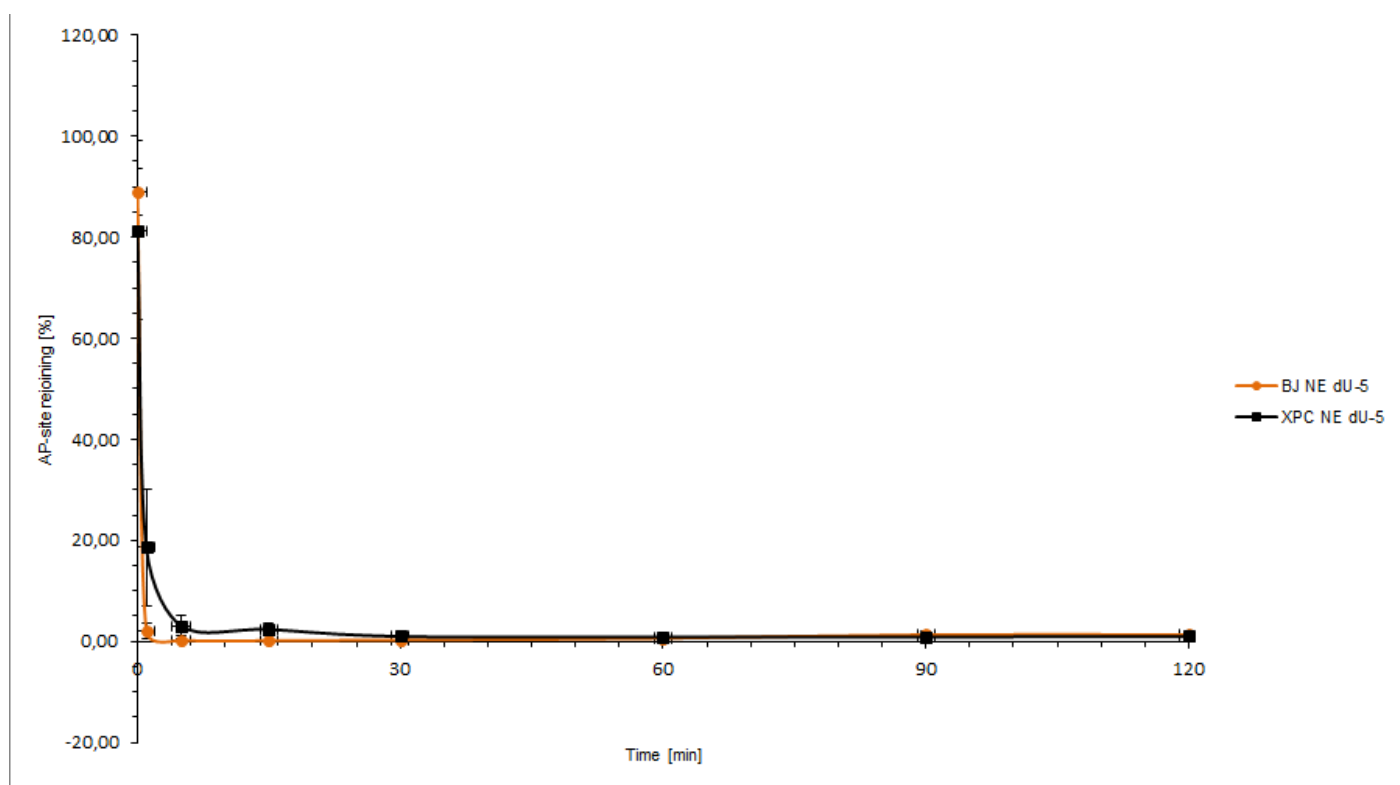

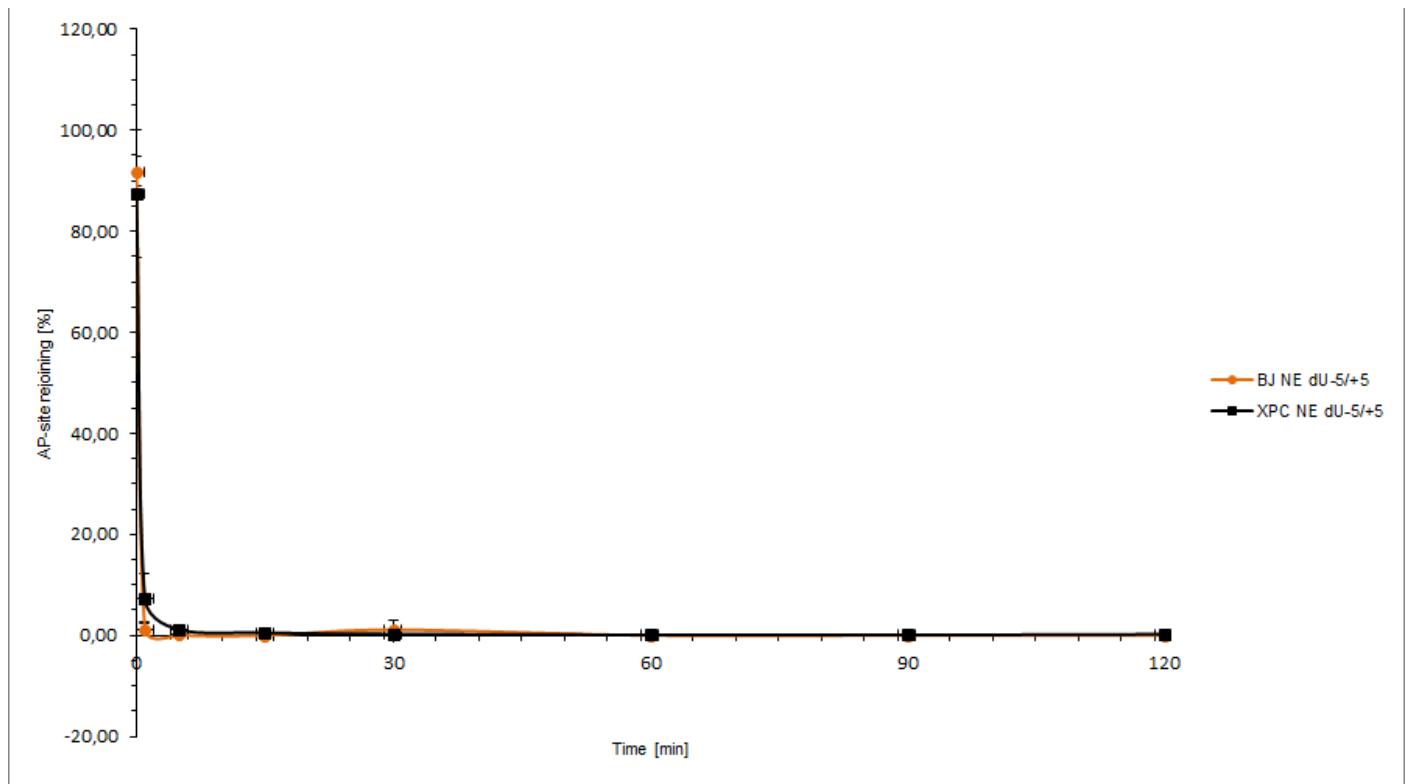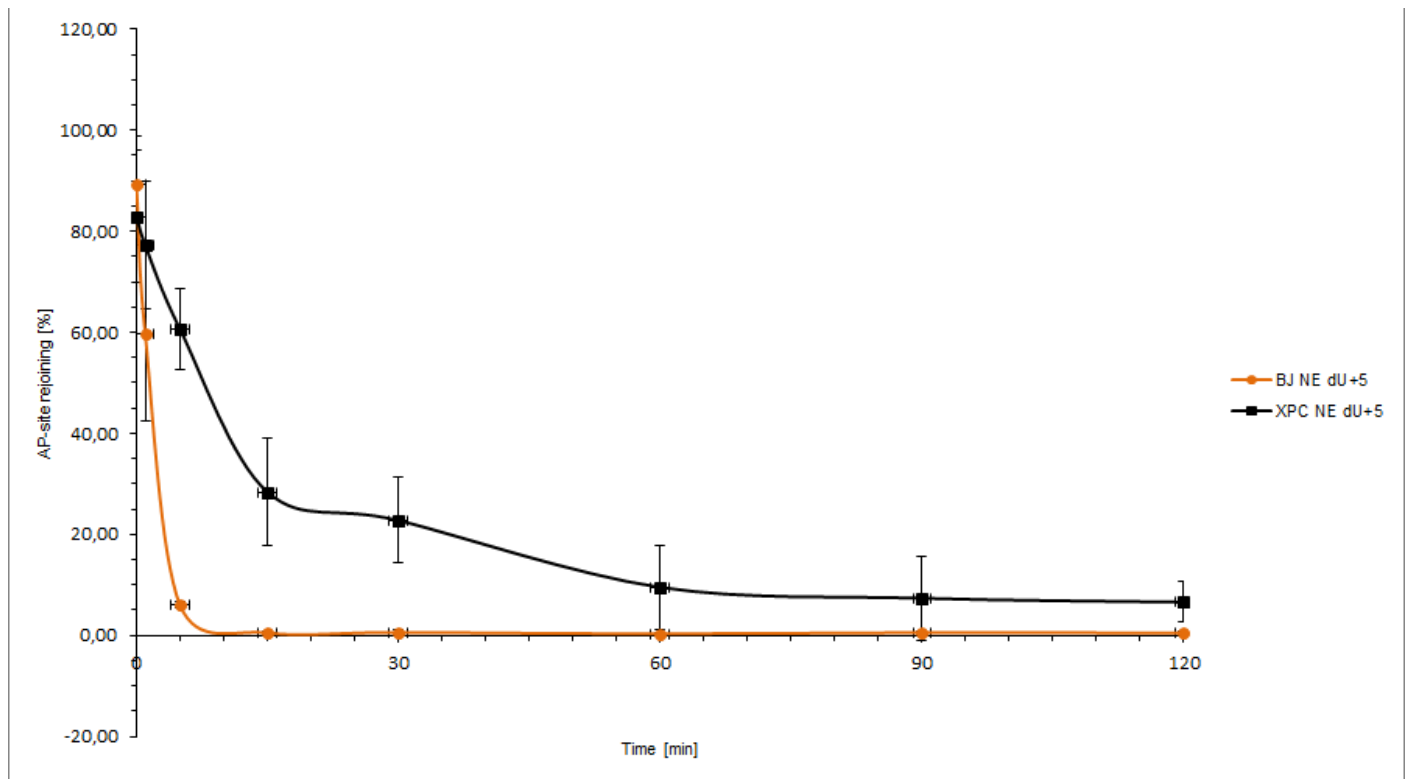

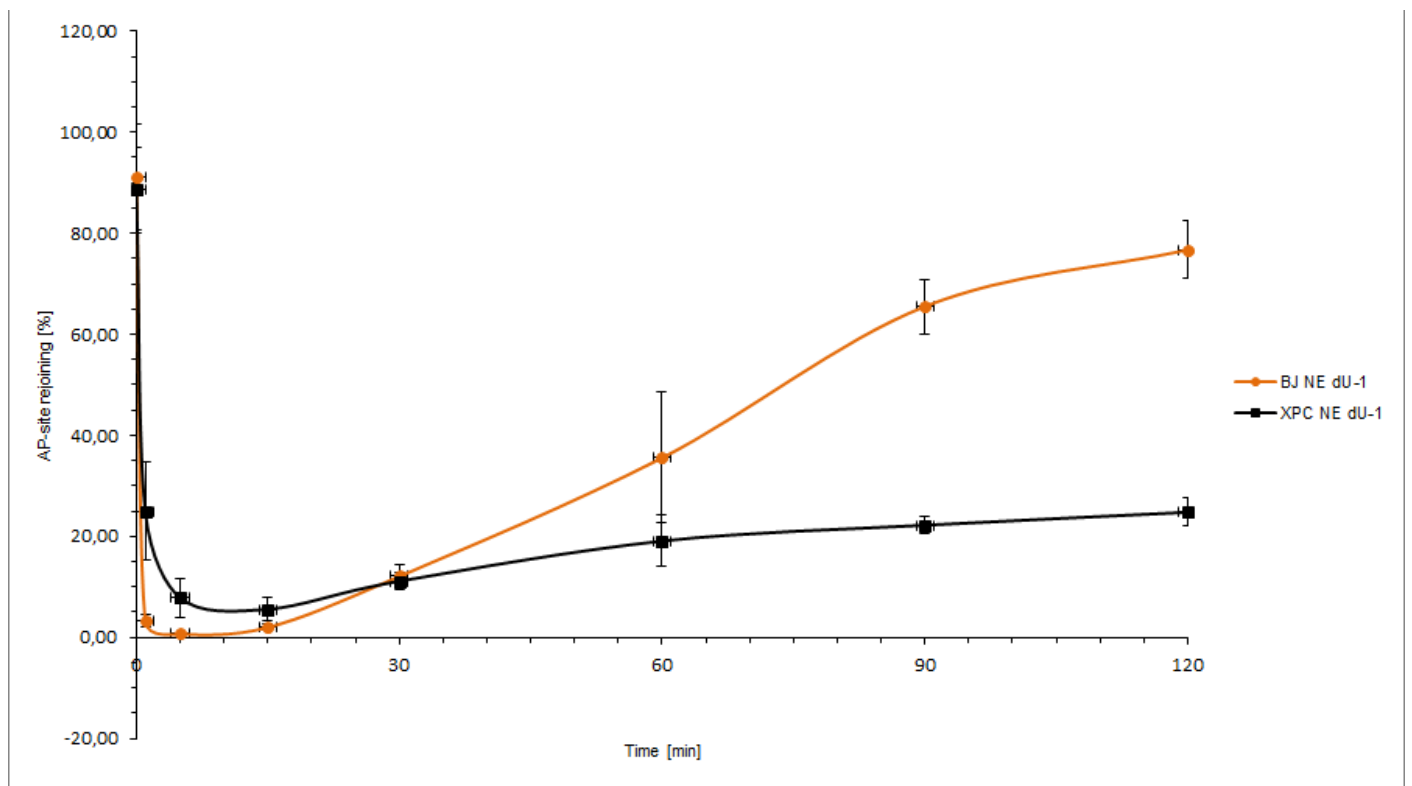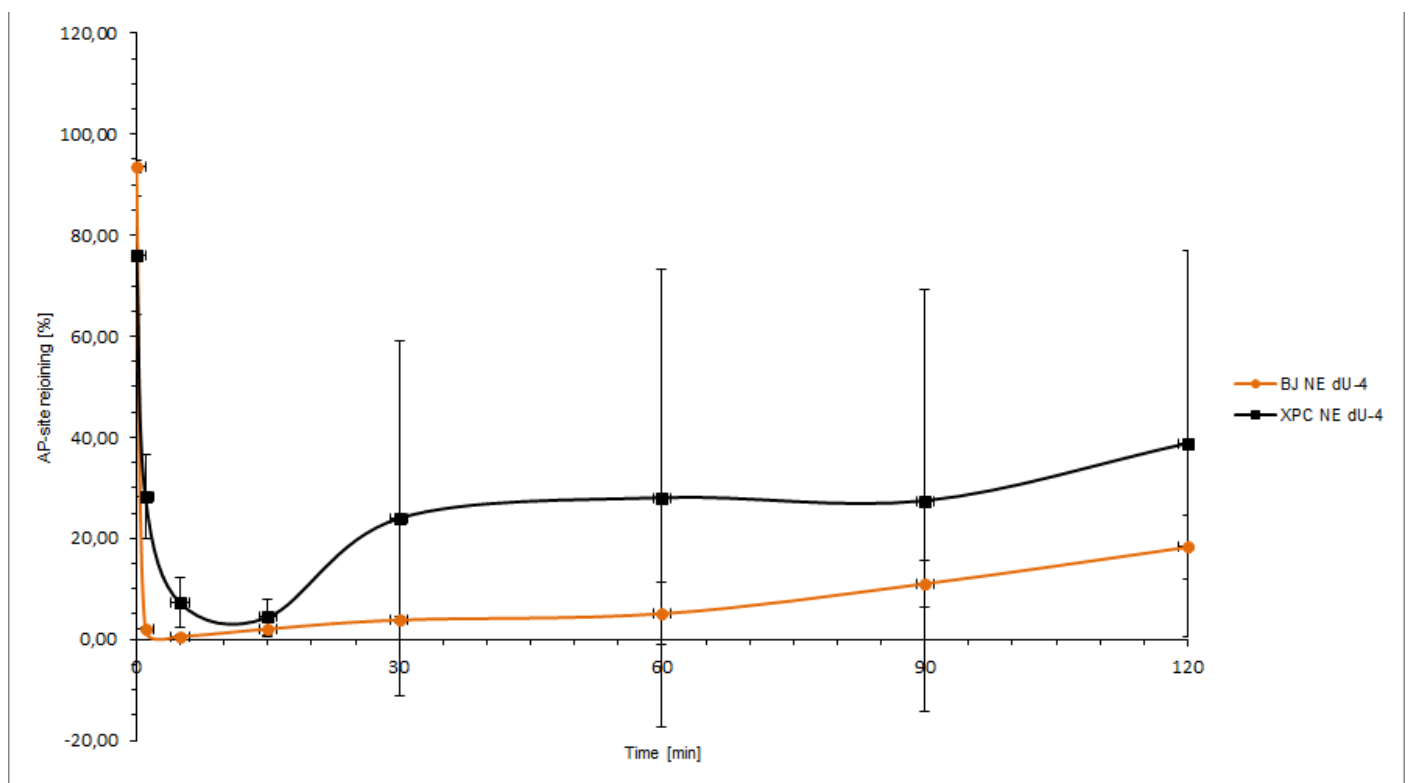

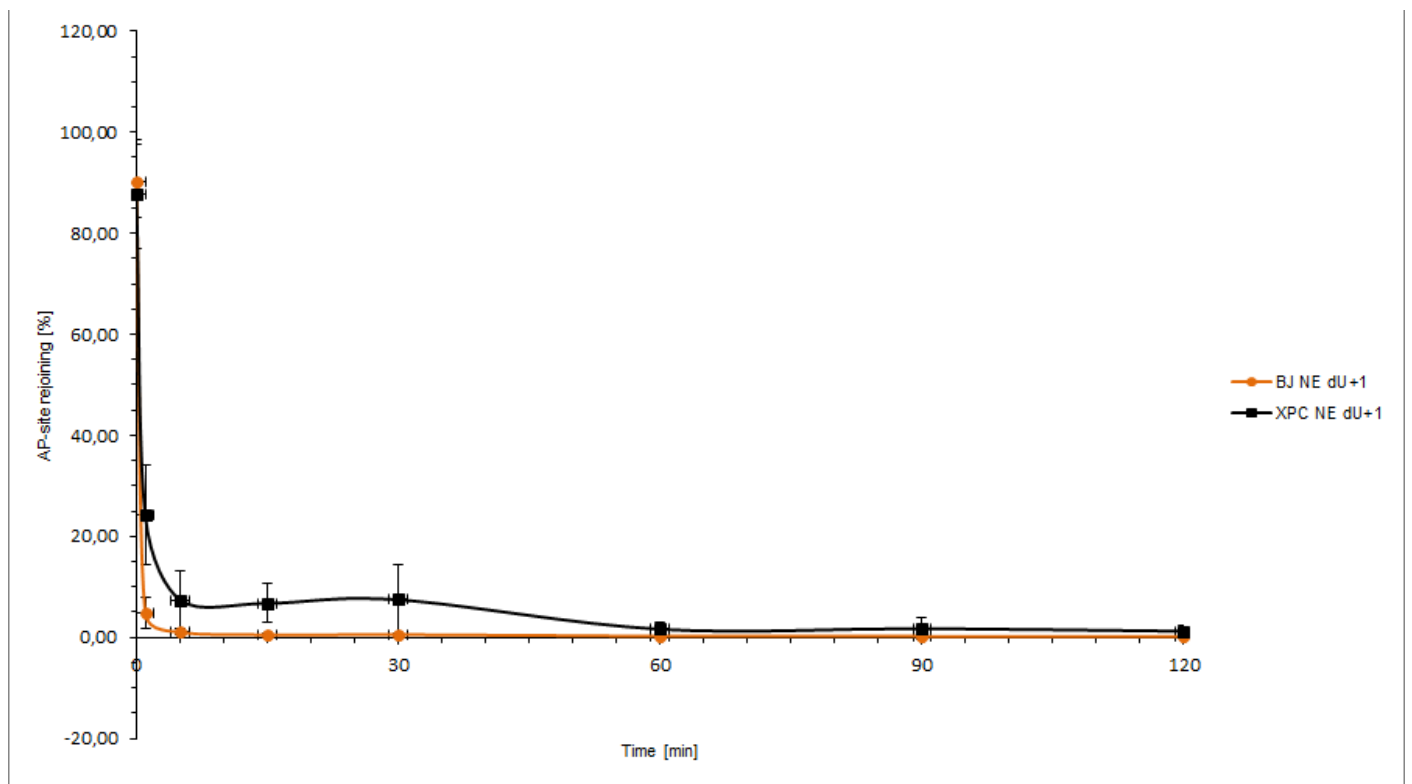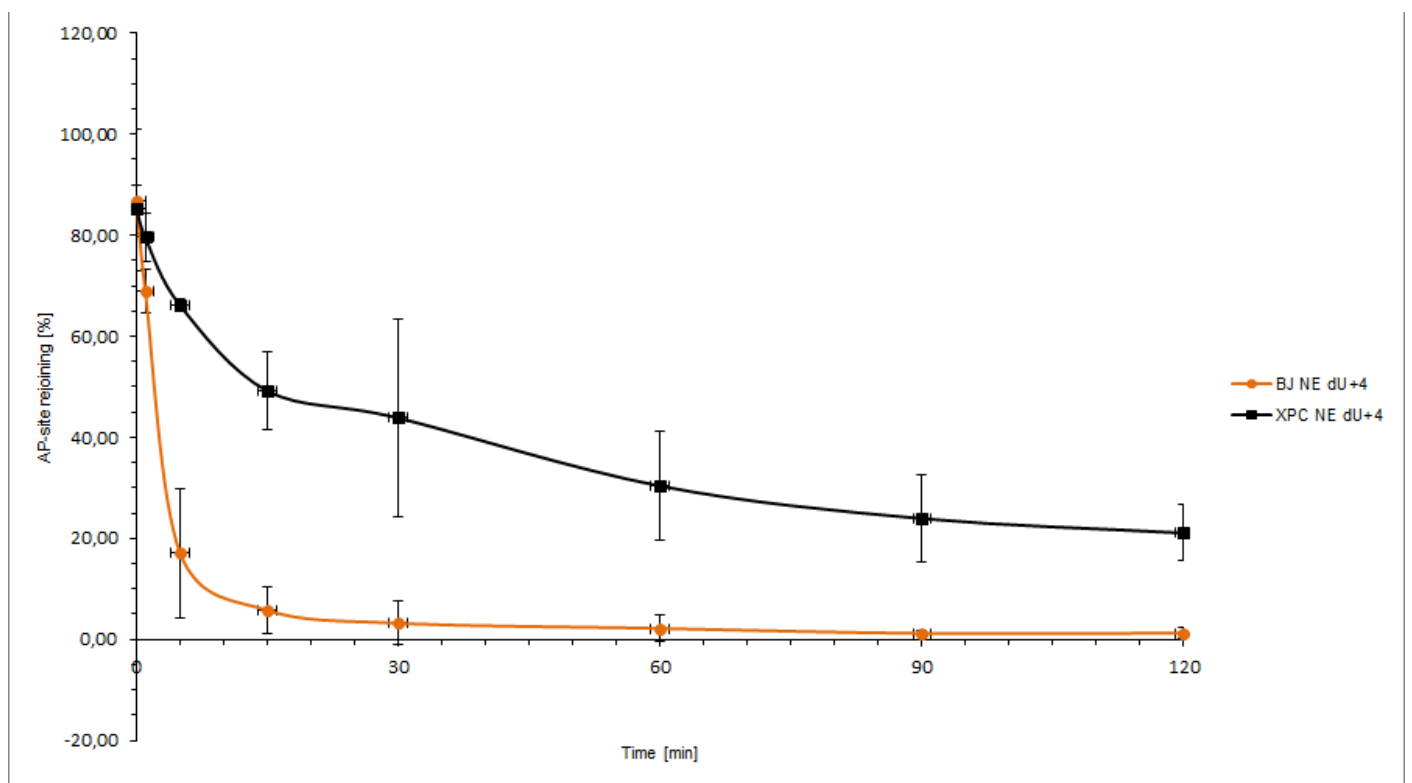

**Figure S14.** AP site rejoining [%] of BJ vs. XPC – comparison of individual strands – RcdA Nuclear Extract.
